# Supplementary material for: Identification and integration analysis of a novel prognostic signature associated with cuproptosis-related ferroptosis genes and relevant lncRNA regulatory axis in lung adenocarcinoma
Source: Aging (Albany NY). 2023 Mar 3;15(5):1543–63. doi: 10.18632/aging.204561 (PMC10042693; doi:10.18632/aging.204561)
Supplement: Supplementary Table 1 [file aging-15-204561-s002.xlsx]

## Sheet: Sheet1
Supplementary Table 1. The gene for ferroptosis in GeneCards.
Gene Symbol	Description	Category	Gifts	GC Id	Relevance score	GeneCards Link
AIFM2	Apoptosis Inducing Factor Mitochondria Associated 2	Protein Coding	41	GC10M070098	12.7566	https://www.genecards.org/cgi-bin/carddisp.pl?gene=AIFM2
GPX4	Glutathione Peroxidase 4	Protein Coding	48	GC19P001103	11.5524	https://www.genecards.org/cgi-bin/carddisp.pl?gene=GPX4
SLC7A11	Solute Carrier Family 7 Member 11	Protein Coding	47	GC04M138164	6.54781	https://www.genecards.org/cgi-bin/carddisp.pl?gene=SLC7A11
TP53	Tumor Protein P53	Protein Coding	55	GC17M007661	5.42653	https://www.genecards.org/cgi-bin/carddisp.pl?gene=TP53
NFE2L2	NFE2 Like BZIP Transcription Factor 2	Protein Coding	53	GC02M177227	5.22664	https://www.genecards.org/cgi-bin/carddisp.pl?gene=NFE2L2
ACSL4	Acyl-CoA Synthetase Long Chain Family Member 4	Protein Coding	48	GC0XM109624	4.44644	https://www.genecards.org/cgi-bin/carddisp.pl?gene=ACSL4
TFRC	Transferrin Receptor	Protein Coding	54	GC03M196031	3.88212	https://www.genecards.org/cgi-bin/carddisp.pl?gene=TFRC
NCOA4	Nuclear Receptor Coactivator 4	Protein Coding	42	GC10M046005	3.57646	https://www.genecards.org/cgi-bin/carddisp.pl?gene=NCOA4
HMOX1	Heme Oxygenase 1	Protein Coding	55	GC22P035380	3.36487	https://www.genecards.org/cgi-bin/carddisp.pl?gene=HMOX1
SLC40A1	Solute Carrier Family 40 Member 1	Protein Coding	48	GC02M189560	3.27099	https://www.genecards.org/cgi-bin/carddisp.pl?gene=SLC40A1
SLC3A2	Solute Carrier Family 3 Member 2	Protein Coding	45	GC11P062856	3.24577	https://www.genecards.org/cgi-bin/carddisp.pl?gene=SLC3A2
ALOX15	Arachidonate 15-Lipoxygenase	Protein Coding	48	GC17M004630	3.10786	https://www.genecards.org/cgi-bin/carddisp.pl?gene=ALOX15
IREB2	Iron Responsive Element Binding Protein 2	Protein Coding	47	GC15P078437	3.0119	https://www.genecards.org/cgi-bin/carddisp.pl?gene=IREB2
VDAC3	Voltage Dependent Anion Channel 3	Protein Coding	46	GC08P042392	2.82525	https://www.genecards.org/cgi-bin/carddisp.pl?gene=VDAC3
HSPB1	Heat Shock Protein Family B (Small) Member 1	Protein Coding	54	GC07P076302	2.80319	https://www.genecards.org/cgi-bin/carddisp.pl?gene=HSPB1
FTH1	Ferritin Heavy Chain 1	Protein Coding	52	GC11M061959	2.77942	https://www.genecards.org/cgi-bin/carddisp.pl?gene=FTH1
POR	Cytochrome P450 Oxidoreductase	Protein Coding	52	GC07P075899	2.74819	https://www.genecards.org/cgi-bin/carddisp.pl?gene=POR
PCBP1	Poly(RC) Binding Protein 1	Protein Coding	44	GC02P070087	2.7056	https://www.genecards.org/cgi-bin/carddisp.pl?gene=PCBP1
CBS	Cystathionine Beta-Synthase	Protein Coding	53	GC21M043053	2.68068	https://www.genecards.org/cgi-bin/carddisp.pl?gene=CBS
BECN1	Beclin 1	Protein Coding	48	GC17M042810	2.61893	https://www.genecards.org/cgi-bin/carddisp.pl?gene=BECN1
YAP1	Yes1 Associated Transcriptional Regulator	Protein Coding	50	GC11P102110	2.54597	https://www.genecards.org/cgi-bin/carddisp.pl?gene=YAP1
FTMT	Ferritin Mitochondrial	Protein Coding	39	GC05P121851	2.52213	https://www.genecards.org/cgi-bin/carddisp.pl?gene=FTMT
ACSL3	Acyl-CoA Synthetase Long Chain Family Member 3	Protein Coding	44	GC02P222860	2.49943	https://www.genecards.org/cgi-bin/carddisp.pl?gene=ACSL3
MAP1LC3B	Microtubule Associated Protein 1 Light Chain 3 Beta	Protein Coding	44	GC16P087384	2.49943	https://www.genecards.org/cgi-bin/carddisp.pl?gene=MAP1LC3B
SAT1	Spermidine/Spermine N1-Acetyltransferase 1	Protein Coding	46	GC0XP023784	2.47526	https://www.genecards.org/cgi-bin/carddisp.pl?gene=SAT1
CP	Ceruloplasmin	Protein Coding	51	GC03M149162	2.44929	https://www.genecards.org/cgi-bin/carddisp.pl?gene=CP
CISD1	CDGSH Iron Sulfur Domain 1	Protein Coding	41	GC10P058269	2.44929	https://www.genecards.org/cgi-bin/carddisp.pl?gene=CISD1
MAP1LC3C	Microtubule Associated Protein 1 Light Chain 3 Gamma	Protein Coding	36	GC01M241995	2.44929	https://www.genecards.org/cgi-bin/carddisp.pl?gene=MAP1LC3C
SLC1A5	Solute Carrier Family 1 Member 5	Protein Coding	47	GC19M068072	2.42105	https://www.genecards.org/cgi-bin/carddisp.pl?gene=SLC1A5
AKR1C2	Aldo-Keto Reductase Family 1 Member C2	Protein Coding	48	GC10M004987	2.38982	https://www.genecards.org/cgi-bin/carddisp.pl?gene=AKR1C2
AKR1C3	Aldo-Keto Reductase Family 1 Member C3	Protein Coding	48	GC10P005035	2.38982	https://www.genecards.org/cgi-bin/carddisp.pl?gene=AKR1C3
STEAP3	STEAP3 Metalloreductase	Protein Coding	48	GC02P123196	2.38982	https://www.genecards.org/cgi-bin/carddisp.pl?gene=STEAP3
AKR1C1	Aldo-Keto Reductase Family 1 Member C1	Protein Coding	45	GC10P004963	2.38982	https://www.genecards.org/cgi-bin/carddisp.pl?gene=AKR1C1
PCBP2	Poly(RC) Binding Protein 2	Protein Coding	44	GC12P053452	2.38982	https://www.genecards.org/cgi-bin/carddisp.pl?gene=PCBP2
ATF4	Activating Transcription Factor 4	Protein Coding	47	GC22P039519	2.3649	https://www.genecards.org/cgi-bin/carddisp.pl?gene=ATF4
GCLC	Glutamate-Cysteine Ligase Catalytic Subunit	Protein Coding	47	GC06M053497	2.35437	https://www.genecards.org/cgi-bin/carddisp.pl?gene=GCLC
NOX4	NADPH Oxidase 4	Protein Coding	47	GC11M089324	2.35437	https://www.genecards.org/cgi-bin/carddisp.pl?gene=NOX4
VDAC2	Voltage Dependent Anion Channel 2	Protein Coding	46	GC10P075210	2.35437	https://www.genecards.org/cgi-bin/carddisp.pl?gene=VDAC2
ATG5	Autophagy Related 5	Protein Coding	47	GC06M106045	2.19362	https://www.genecards.org/cgi-bin/carddisp.pl?gene=ATG5
ATG7	Autophagy Related 7	Protein Coding	45	GC03P012714	2.19362	https://www.genecards.org/cgi-bin/carddisp.pl?gene=ATG7
PARK7	Parkinsonism Associated Deglycase	Protein Coding	50	GC01P008121	2.18032	https://www.genecards.org/cgi-bin/carddisp.pl?gene=PARK7
PRKAA1	Protein Kinase AMP-Activated Catalytic Subunit Alpha 1	Protein Coding	50	GC05M040759	1.93826	https://www.genecards.org/cgi-bin/carddisp.pl?gene=PRKAA1
ACSL1	Acyl-CoA Synthetase Long Chain Family Member 1	Protein Coding	47	GC04M184755	1.8917	https://www.genecards.org/cgi-bin/carddisp.pl?gene=ACSL1
LCN2	Lipocalin 2	Protein Coding	48	GC09P128149	1.84785	https://www.genecards.org/cgi-bin/carddisp.pl?gene=LCN2
SCD	Stearoyl-CoA Desaturase	Protein Coding	52	GC10P100347	1.79439	https://www.genecards.org/cgi-bin/carddisp.pl?gene=SCD
TF	Transferrin	Protein Coding	53	GC03P134678	1.77081	https://www.genecards.org/cgi-bin/carddisp.pl?gene=TF
MIR214	MicroRNA 214	RNA Gene	24	GC01M172234	1.71861	https://www.genecards.org/cgi-bin/carddisp.pl?gene=MIR214
FBXW7	F-Box And WD Repeat Domain Containing 7	Protein Coding	46	GC04M152321	1.71321	https://www.genecards.org/cgi-bin/carddisp.pl?gene=FBXW7
SIRT3	Sirtuin 3	Protein Coding	50	GC11M000215	1.7006	https://www.genecards.org/cgi-bin/carddisp.pl?gene=SIRT3
HMGB1	High Mobility Group Box 1	Protein Coding	49	GC13M030456	1.7006	https://www.genecards.org/cgi-bin/carddisp.pl?gene=HMGB1
SP1	Sp1 Transcription Factor	Protein Coding	49	GC12P053380	1.7006	https://www.genecards.org/cgi-bin/carddisp.pl?gene=SP1
ELAVL1	ELAV Like RNA Binding Protein 1	Protein Coding	43	GC19M007958	1.6986	https://www.genecards.org/cgi-bin/carddisp.pl?gene=ELAVL1
WWTR1	WW Domain Containing Transcription Regulator 1	Protein Coding	43	GC03M149517	1.66237	https://www.genecards.org/cgi-bin/carddisp.pl?gene=WWTR1
ATF3	Activating Transcription Factor 3	Protein Coding	47	GC01P212565	1.64195	https://www.genecards.org/cgi-bin/carddisp.pl?gene=ATF3
PANX1	Pannexin 1	Protein Coding	47	GC11P094128	1.64195	https://www.genecards.org/cgi-bin/carddisp.pl?gene=PANX1
OTUB1	OTU Deubiquitinase, Ubiquitin Aldehyde Binding 1	Protein Coding	44	GC11P063985	1.62048	https://www.genecards.org/cgi-bin/carddisp.pl?gene=OTUB1
KRAS	KRAS Proto-Oncogene, GTPase	Protein Coding	54	GC12M025204	1.59778	https://www.genecards.org/cgi-bin/carddisp.pl?gene=KRAS
PROM2	Prominin 2	Protein Coding	38	GC02P095274	1.59778	https://www.genecards.org/cgi-bin/carddisp.pl?gene=PROM2
LINC00336	Long Intergenic Non-Protein Coding RNA 336	RNA Gene	23	GC06M033586	1.59778	https://www.genecards.org/cgi-bin/carddisp.pl?gene=LINC00336
SOCS1	Suppressor Of Cytokine Signaling 1	Protein Coding	46	GC16M012363	1.56523	https://www.genecards.org/cgi-bin/carddisp.pl?gene=SOCS1
HELLS	Helicase, Lymphoid Specific	Protein Coding	48	GC10P094546	1.5253	https://www.genecards.org/cgi-bin/carddisp.pl?gene=HELLS
ENO1	Enolase 1	Protein Coding	50	GC01M008861	1.50383	https://www.genecards.org/cgi-bin/carddisp.pl?gene=ENO1
LAMP2	Lysosomal Associated Membrane Protein 2	Protein Coding	46	GC0XM120426	1.50383	https://www.genecards.org/cgi-bin/carddisp.pl?gene=LAMP2
MIR497	MicroRNA 497	RNA Gene	23	GC17M007022	1.48817	https://www.genecards.org/cgi-bin/carddisp.pl?gene=MIR497
GOT1	Glutamic-Oxaloacetic Transaminase 1	Protein Coding	48	GC10M099396	1.48112	https://www.genecards.org/cgi-bin/carddisp.pl?gene=GOT1
DECR1	2,4-Dienoyl-CoA Reductase 1	Protein Coding	43	GC08P090001	1.48112	https://www.genecards.org/cgi-bin/carddisp.pl?gene=DECR1
ECH1	Enoyl-CoA Hydratase 1	Protein Coding	42	GC19M038815	1.48112	https://www.genecards.org/cgi-bin/carddisp.pl?gene=ECH1
DHODH	Dihydroorotate Dehydrogenase (Quinone)	Protein Coding	48	GC16P072008	1.45889	https://www.genecards.org/cgi-bin/carddisp.pl?gene=DHODH
STK11	Serine/Threonine Kinase 11	Protein Coding	53	GC19P001177	1.45272	https://www.genecards.org/cgi-bin/carddisp.pl?gene=STK11
PLA2G6	Phospholipase A2 Group VI	Protein Coding	50	GC22M060879	1.44017	https://www.genecards.org/cgi-bin/carddisp.pl?gene=PLA2G6
MDM2	MDM2 Proto-Oncogene	Protein Coding	55	GC12P068808	1.43099	https://www.genecards.org/cgi-bin/carddisp.pl?gene=MDM2
TIGAR	TP53 Induced Glycolysis Regulatory Phosphatase	Protein Coding	41	GC12P022313	1.43099	https://www.genecards.org/cgi-bin/carddisp.pl?gene=TIGAR
FTL	Ferritin Light Chain	Protein Coding	48	GC19P048965	1.39233	https://www.genecards.org/cgi-bin/carddisp.pl?gene=FTL
TXNRD1	Thioredoxin Reductase 1	Protein Coding	48	GC12P104215	1.39233	https://www.genecards.org/cgi-bin/carddisp.pl?gene=TXNRD1
FDFT1	Farnesyl-Diphosphate Farnesyltransferase 1	Protein Coding	47	GC08P011795	1.39233	https://www.genecards.org/cgi-bin/carddisp.pl?gene=FDFT1
LPCAT3	Lysophosphatidylcholine Acyltransferase 3	Protein Coding	39	GC12M006976	1.39233	https://www.genecards.org/cgi-bin/carddisp.pl?gene=LPCAT3
RELA	RELA Proto-Oncogene, NF-KB Subunit	Protein Coding	54	GC11M065653	1.37761	https://www.genecards.org/cgi-bin/carddisp.pl?gene=RELA
FSCN1	Fascin Actin-Bundling Protein 1	Protein Coding	47	GC07P005592	1.35607	https://www.genecards.org/cgi-bin/carddisp.pl?gene=FSCN1
NF2	NF2, Moesin-Ezrin-Radixin Like (MERLIN) Tumor Suppressor	Protein Coding	50	GC22P029603	1.34223	https://www.genecards.org/cgi-bin/carddisp.pl?gene=NF2
XRCC6	X-Ray Repair Cross Complementing 6	Protein Coding	48	GC22P041676	1.3319	https://www.genecards.org/cgi-bin/carddisp.pl?gene=XRCC6
CCT3	Chaperonin Containing TCP1 Subunit 3	Protein Coding	44	GC01M156308	1.3319	https://www.genecards.org/cgi-bin/carddisp.pl?gene=CCT3
ATM	ATM Serine/Threonine Kinase	Protein Coding	55	GC11P108222	1.32351	https://www.genecards.org/cgi-bin/carddisp.pl?gene=ATM
TNF	Tumor Necrosis Factor	Protein Coding	54	GC06P087731	1.32351	https://www.genecards.org/cgi-bin/carddisp.pl?gene=TNF
SKP2	S-Phase Kinase Associated Protein 2	Protein Coding	46	GC05P036151	1.32351	https://www.genecards.org/cgi-bin/carddisp.pl?gene=SKP2
ATG16L1	Autophagy Related 16 Like 1	Protein Coding	44	GC02P233258	1.32351	https://www.genecards.org/cgi-bin/carddisp.pl?gene=ATG16L1
SLC39A7	Solute Carrier Family 39 Member 7	Protein Coding	44	GC06P033200	1.32351	https://www.genecards.org/cgi-bin/carddisp.pl?gene=SLC39A7
ZFP36	ZFP36 Ring Finger Protein	Protein Coding	43	GC19P039406	1.32351	https://www.genecards.org/cgi-bin/carddisp.pl?gene=ZFP36
H2AC1	H2A Clustered Histone 1	Protein Coding	35	GC06M026001	1.30593	https://www.genecards.org/cgi-bin/carddisp.pl?gene=H2AC1
MEF2C	Myocyte Enhancer Factor 2C	Protein Coding	51	GC05M088718	1.304	https://www.genecards.org/cgi-bin/carddisp.pl?gene=MEF2C
BAP1	BRCA1 Associated Protein 1	Protein Coding	50	GC03M052401	1.304	https://www.genecards.org/cgi-bin/carddisp.pl?gene=BAP1
TGFB1	Transforming Growth Factor Beta 1	Protein Coding	55	GC19M041301	1.28358	https://www.genecards.org/cgi-bin/carddisp.pl?gene=TGFB1
ADCY10	Adenylate Cyclase 10	Protein Coding	46	GC01M167809	1.28358	https://www.genecards.org/cgi-bin/carddisp.pl?gene=ADCY10
ERBB2	Erb-B2 Receptor Tyrosine Kinase 2	Protein Coding	58	GC17P039687	1.26211	https://www.genecards.org/cgi-bin/carddisp.pl?gene=ERBB2
CTSB	Cathepsin B	Protein Coding	55	GC08M011842	1.26211	https://www.genecards.org/cgi-bin/carddisp.pl?gene=CTSB
TLR4	Toll Like Receptor 4	Protein Coding	54	GC09P117704	1.26211	https://www.genecards.org/cgi-bin/carddisp.pl?gene=TLR4
YWHAE	Tyrosine 3-Monooxygenase/Tryptophan 5-Monooxygenase Activation Protein Epsilon	Protein Coding	52	GC17M004893	1.26211	https://www.genecards.org/cgi-bin/carddisp.pl?gene=YWHAE
PKM	Pyruvate Kinase M1/2	Protein Coding	51	GC15M072199	1.26211	https://www.genecards.org/cgi-bin/carddisp.pl?gene=PKM
CDC25A	Cell Division Cycle 25A	Protein Coding	50	GC03M048183	1.26211	https://www.genecards.org/cgi-bin/carddisp.pl?gene=CDC25A
NR1H4	Nuclear Receptor Subfamily 1 Group H Member 4	Protein Coding	50	GC12P100473	1.26211	https://www.genecards.org/cgi-bin/carddisp.pl?gene=NR1H4
PRDX6	Peroxiredoxin 6	Protein Coding	50	GC01P173477	1.26211	https://www.genecards.org/cgi-bin/carddisp.pl?gene=PRDX6
RACK1	Receptor For Activated C Kinase 1	Protein Coding	45	GC05M181873	1.26211	https://www.genecards.org/cgi-bin/carddisp.pl?gene=RACK1
RPL7	Ribosomal Protein L7	Protein Coding	44	GC08M073290	1.26211	https://www.genecards.org/cgi-bin/carddisp.pl?gene=RPL7
RPS3A	Ribosomal Protein S3A	Protein Coding	43	GC04P151099	1.26211	https://www.genecards.org/cgi-bin/carddisp.pl?gene=RPS3A
MIR30E	MicroRNA 30e	RNA Gene	25	GC01P040754	1.26211	https://www.genecards.org/cgi-bin/carddisp.pl?gene=MIR30E
DPP4	Dipeptidyl Peptidase 4	Protein Coding	53	GC02M161992	1.26002	https://www.genecards.org/cgi-bin/carddisp.pl?gene=DPP4
CTH	Cystathionine Gamma-Lyase	Protein Coding	52	GC01P070411	1.26002	https://www.genecards.org/cgi-bin/carddisp.pl?gene=CTH
CYBB	Cytochrome B-245 Beta Chain	Protein Coding	51	GC0XP037780	1.26002	https://www.genecards.org/cgi-bin/carddisp.pl?gene=CYBB
PRNP	Prion Protein	Protein Coding	51	GC20P004686	1.26002	https://www.genecards.org/cgi-bin/carddisp.pl?gene=PRNP
SLC11A2	Solute Carrier Family 11 Member 2	Protein Coding	51	GC12M050952	1.26002	https://www.genecards.org/cgi-bin/carddisp.pl?gene=SLC11A2
HMGCR	3-Hydroxy-3-Methylglutaryl-CoA Reductase	Protein Coding	50	GC05P075336	1.26002	https://www.genecards.org/cgi-bin/carddisp.pl?gene=HMGCR
GCH1	GTP Cyclohydrolase 1	Protein Coding	49	GC14M054842	1.26002	https://www.genecards.org/cgi-bin/carddisp.pl?gene=GCH1
GSS	Glutathione Synthetase	Protein Coding	49	GC20M034928	1.26002	https://www.genecards.org/cgi-bin/carddisp.pl?gene=GSS
PHKG2	Phosphorylase Kinase Catalytic Subunit Gamma 2	Protein Coding	48	GC16P041931	1.26002	https://www.genecards.org/cgi-bin/carddisp.pl?gene=PHKG2
SLC39A8	Solute Carrier Family 39 Member 8	Protein Coding	47	GC04M102252	1.26002	https://www.genecards.org/cgi-bin/carddisp.pl?gene=SLC39A8
SLC39A14	Solute Carrier Family 39 Member 14	Protein Coding	46	GC08P022367	1.26002	https://www.genecards.org/cgi-bin/carddisp.pl?gene=SLC39A14
ACSL5	Acyl-CoA Synthetase Long Chain Family Member 5	Protein Coding	45	GC10P112374	1.26002	https://www.genecards.org/cgi-bin/carddisp.pl?gene=ACSL5
NOX1	NADPH Oxidase 1	Protein Coding	45	GC0XM100843	1.26002	https://www.genecards.org/cgi-bin/carddisp.pl?gene=NOX1
GCLM	Glutamate-Cysteine Ligase Modifier Subunit	Protein Coding	44	GC01M093885	1.26002	https://www.genecards.org/cgi-bin/carddisp.pl?gene=GCLM
SLC38A1	Solute Carrier Family 38 Member 1	Protein Coding	44	GC12M046183	1.26002	https://www.genecards.org/cgi-bin/carddisp.pl?gene=SLC38A1
ACSL6	Acyl-CoA Synthetase Long Chain Family Member 6	Protein Coding	43	GC05M131949	1.26002	https://www.genecards.org/cgi-bin/carddisp.pl?gene=ACSL6
MAP1LC3A	Microtubule Associated Protein 1 Light Chain 3 Alpha	Protein Coding	43	GC20P034546	1.26002	https://www.genecards.org/cgi-bin/carddisp.pl?gene=MAP1LC3A
CHMP5	Charged Multivesicular Body Protein 5	Protein Coding	42	GC09P033257	1.26002	https://www.genecards.org/cgi-bin/carddisp.pl?gene=CHMP5
COQ2	Coenzyme Q2, Polyprenyltransferase	Protein Coding	42	GC04M083261	1.26002	https://www.genecards.org/cgi-bin/carddisp.pl?gene=COQ2
SAT2	Spermidine/Spermine N1-Acetyltransferase Family Member 2	Protein Coding	40	GC17M007626	1.26002	https://www.genecards.org/cgi-bin/carddisp.pl?gene=SAT2
CHMP6	Charged Multivesicular Body Protein 6	Protein Coding	37	GC17P080991	1.26002	https://www.genecards.org/cgi-bin/carddisp.pl?gene=CHMP6
GRIK1-AS2	GRIK1 Antisense RNA 2	RNA Gene	19	GC21P029195	1.26002	https://www.genecards.org/cgi-bin/carddisp.pl?gene=GRIK1-AS2
IDH1	Isocitrate Dehydrogenase (NADP(+)) 1	Protein Coding	56	GC02M208236	1.23941	https://www.genecards.org/cgi-bin/carddisp.pl?gene=IDH1
PTEN	Phosphatase And Tensin Homolog	Protein Coding	54	GC10P093576	1.23941	https://www.genecards.org/cgi-bin/carddisp.pl?gene=PTEN
GJA1	Gap Junction Protein Alpha 1	Protein Coding	53	GC06P121436	1.23941	https://www.genecards.org/cgi-bin/carddisp.pl?gene=GJA1
GSK3B	Glycogen Synthase Kinase 3 Beta	Protein Coding	52	GC03M119821	1.23941	https://www.genecards.org/cgi-bin/carddisp.pl?gene=GSK3B
PRDX1	Peroxiredoxin 1	Protein Coding	52	GC01M045511	1.23941	https://www.genecards.org/cgi-bin/carddisp.pl?gene=PRDX1
CAV1	Caveolin 1	Protein Coding	51	GC07P116524	1.23941	https://www.genecards.org/cgi-bin/carddisp.pl?gene=CAV1
PRKCB	Protein Kinase C Beta	Protein Coding	50	GC16P024412	1.23941	https://www.genecards.org/cgi-bin/carddisp.pl?gene=PRKCB
TNFAIP3	TNF Alpha Induced Protein 3	Protein Coding	50	GC06P137866	1.23941	https://www.genecards.org/cgi-bin/carddisp.pl?gene=TNFAIP3
SREBF1	Sterol Regulatory Element Binding Transcription Factor 1	Protein Coding	48	GC17M017810	1.23941	https://www.genecards.org/cgi-bin/carddisp.pl?gene=SREBF1
HAMP	Hepcidin Antimicrobial Peptide	Protein Coding	46	GC19P069623	1.23941	https://www.genecards.org/cgi-bin/carddisp.pl?gene=HAMP
NEAT1	Nuclear Paraspeckle Assembly Transcript 1	RNA Gene	27	GC11P070383	1.23941	https://www.genecards.org/cgi-bin/carddisp.pl?gene=NEAT1
PSEN1	Presenilin 1	Protein Coding	55	GC14P073136	1.21524	https://www.genecards.org/cgi-bin/carddisp.pl?gene=PSEN1
AHCY	Adenosylhomocysteinase	Protein Coding	52	GC20M034890	1.21524	https://www.genecards.org/cgi-bin/carddisp.pl?gene=AHCY
GGT1	Gamma-Glutamyltransferase 1	Protein Coding	52	GC22P024583	1.21524	https://www.genecards.org/cgi-bin/carddisp.pl?gene=GGT1
SIRT1	Sirtuin 1	Protein Coding	52	GC10P067884	1.21524	https://www.genecards.org/cgi-bin/carddisp.pl?gene=SIRT1
SPARC	Secreted Protein Acidic And Cysteine Rich	Protein Coding	52	GC05M151661	1.21524	https://www.genecards.org/cgi-bin/carddisp.pl?gene=SPARC
MAT2A	Methionine Adenosyltransferase 2A	Protein Coding	50	GC02P085861	1.21524	https://www.genecards.org/cgi-bin/carddisp.pl?gene=MAT2A
MYCN	MYCN Proto-Oncogene, BHLH Transcription Factor	Protein Coding	50	GC02P015949	1.21524	https://www.genecards.org/cgi-bin/carddisp.pl?gene=MYCN
GPD2	Glycerol-3-Phosphate Dehydrogenase 2	Protein Coding	49	GC02P156401	1.21524	https://www.genecards.org/cgi-bin/carddisp.pl?gene=GPD2
FOXC1	Forkhead Box C1	Protein Coding	44	GC06P001610	1.21524	https://www.genecards.org/cgi-bin/carddisp.pl?gene=FOXC1
STYK1	Serine/Threonine/Tyrosine Kinase 1	Protein Coding	43	GC12M021854	1.21524	https://www.genecards.org/cgi-bin/carddisp.pl?gene=STYK1
RBMS1	RNA Binding Motif Single Stranded Interacting Protein 1	Protein Coding	42	GC02M160272	1.21524	https://www.genecards.org/cgi-bin/carddisp.pl?gene=RBMS1
NKAP	NFKB Activating Protein	Protein Coding	40	GC0XM120154	1.21524	https://www.genecards.org/cgi-bin/carddisp.pl?gene=NKAP
PIR	Pirin	Protein Coding	40	GC0XM015402	1.21524	https://www.genecards.org/cgi-bin/carddisp.pl?gene=PIR
SESN2	Sestrin 2	Protein Coding	40	GC01P028290	1.21524	https://www.genecards.org/cgi-bin/carddisp.pl?gene=SESN2
PVT1	Pvt1 Oncogene	RNA Gene	27	GC08P127877	1.21524	https://www.genecards.org/cgi-bin/carddisp.pl?gene=PVT1
MIR670	MicroRNA 670	RNA Gene	15	GC11P043792	1.21524	https://www.genecards.org/cgi-bin/carddisp.pl?gene=MIR670
VDAC1	Voltage Dependent Anion Channel 1	Protein Coding	49	GC05M133975	1.21101	https://www.genecards.org/cgi-bin/carddisp.pl?gene=VDAC1
IDH2	Isocitrate Dehydrogenase (NADP(+)) 2	Protein Coding	55	GC15M090083	1.18927	https://www.genecards.org/cgi-bin/carddisp.pl?gene=IDH2
NFKB1	Nuclear Factor Kappa B Subunit 1	Protein Coding	55	GC04P102501	1.18927	https://www.genecards.org/cgi-bin/carddisp.pl?gene=NFKB1
IL6	Interleukin 6	Protein Coding	53	GC07P022725	1.18927	https://www.genecards.org/cgi-bin/carddisp.pl?gene=IL6
DLD	Dihydrolipoamide Dehydrogenase	Protein Coding	51	GC07P107890	1.18927	https://www.genecards.org/cgi-bin/carddisp.pl?gene=DLD
KAT5	Lysine Acetyltransferase 5	Protein Coding	51	GC11P065711	1.18927	https://www.genecards.org/cgi-bin/carddisp.pl?gene=KAT5
DKK1	Dickkopf WNT Signaling Pathway Inhibitor 1	Protein Coding	50	GC10P052314	1.18927	https://www.genecards.org/cgi-bin/carddisp.pl?gene=DKK1
HNRNPA1	Heterogeneous Nuclear Ribonucleoprotein A1	Protein Coding	50	GC12P054280	1.18927	https://www.genecards.org/cgi-bin/carddisp.pl?gene=HNRNPA1
JUN	Jun Proto-Oncogene, AP-1 Transcription Factor Subunit	Protein Coding	50	GC01M058780	1.18927	https://www.genecards.org/cgi-bin/carddisp.pl?gene=JUN
LIFR	LIF Receptor Subunit Alpha	Protein Coding	49	GC05M038475	1.18927	https://www.genecards.org/cgi-bin/carddisp.pl?gene=LIFR
SNAI2	Snail Family Transcriptional Repressor 2	Protein Coding	48	GC08M048917	1.18927	https://www.genecards.org/cgi-bin/carddisp.pl?gene=SNAI2
STUB1	STIP1 Homology And U-Box Containing Protein 1	Protein Coding	48	GC16P012618	1.18927	https://www.genecards.org/cgi-bin/carddisp.pl?gene=STUB1
MDM4	MDM4 Regulator Of P53	Protein Coding	47	GC01P204516	1.18927	https://www.genecards.org/cgi-bin/carddisp.pl?gene=MDM4
SOX2	SRY-Box Transcription Factor 2	Protein Coding	47	GC03P181711	1.18927	https://www.genecards.org/cgi-bin/carddisp.pl?gene=SOX2
GPX3	Glutathione Peroxidase 3	Protein Coding	44	GC05P150997	1.18927	https://www.genecards.org/cgi-bin/carddisp.pl?gene=GPX3
GSTZ1	Glutathione S-Transferase Zeta 1	Protein Coding	44	GC14P077320	1.18927	https://www.genecards.org/cgi-bin/carddisp.pl?gene=GSTZ1
HCAR1	Hydroxycarboxylic Acid Receptor 1	Protein Coding	43	GC12M122726	1.18927	https://www.genecards.org/cgi-bin/carddisp.pl?gene=HCAR1
BMAL1	Basic Helix-Loop-Helix ARNT Like 1	Protein Coding	42	GC11P013277	1.18927	https://www.genecards.org/cgi-bin/carddisp.pl?gene=BMAL1
YTHDC2	YTH Domain Containing 2	Protein Coding	40	GC05P113513	1.18927	https://www.genecards.org/cgi-bin/carddisp.pl?gene=YTHDC2
RETREG1	Reticulophagy Regulator 1	Protein Coding	38	GC05M016472	1.18927	https://www.genecards.org/cgi-bin/carddisp.pl?gene=RETREG1
USP35	Ubiquitin Specific Peptidase 35	Protein Coding	37	GC11P078188	1.18927	https://www.genecards.org/cgi-bin/carddisp.pl?gene=USP35
MIR302A	MicroRNA 302a	RNA Gene	22	GC04M112780	1.18927	https://www.genecards.org/cgi-bin/carddisp.pl?gene=MIR302A
MIR424	MicroRNA 424	RNA Gene	21	GC0XM134697	1.18927	https://www.genecards.org/cgi-bin/carddisp.pl?gene=MIR424
MIR15A	MicroRNA 15a	RNA Gene	19	GC13M050049	1.18927	https://www.genecards.org/cgi-bin/carddisp.pl?gene=MIR15A
ADAMTS9-AS1	ADAMTS9 Antisense RNA 1	RNA Gene	18	GC03P064549	1.18927	https://www.genecards.org/cgi-bin/carddisp.pl?gene=ADAMTS9-AS1
MIR587	MicroRNA 587	RNA Gene	18	GC06P106784	1.18927	https://www.genecards.org/cgi-bin/carddisp.pl?gene=MIR587
PGM5P3-AS1	PGM5P3 Antisense RNA 1	RNA Gene	13	GC09P000073	1.18927	https://www.genecards.org/cgi-bin/carddisp.pl?gene=PGM5P3-AS1
DDR2	Discoidin Domain Receptor Tyrosine Kinase 2	Protein Coding	55	GC01P162631	1.16104	https://www.genecards.org/cgi-bin/carddisp.pl?gene=DDR2
YY1	YY1 Transcription Factor	Protein Coding	51	GC14P100238	1.16104	https://www.genecards.org/cgi-bin/carddisp.pl?gene=YY1
SPHK1	Sphingosine Kinase 1	Protein Coding	49	GC17P076376	1.16104	https://www.genecards.org/cgi-bin/carddisp.pl?gene=SPHK1
LONP1	Lon Peptidase 1, Mitochondrial	Protein Coding	48	GC19M005691	1.16104	https://www.genecards.org/cgi-bin/carddisp.pl?gene=LONP1
EFEMP1	EGF Containing Fibulin Extracellular Matrix Protein 1	Protein Coding	47	GC02M055865	1.16104	https://www.genecards.org/cgi-bin/carddisp.pl?gene=EFEMP1
FBLN1	Fibulin 1	Protein Coding	47	GC22P045502	1.16104	https://www.genecards.org/cgi-bin/carddisp.pl?gene=FBLN1
PDK4	Pyruvate Dehydrogenase Kinase 4	Protein Coding	46	GC07M095583	1.16104	https://www.genecards.org/cgi-bin/carddisp.pl?gene=PDK4
CD82	CD82 Molecule	Protein Coding	45	GC11P044586	1.16104	https://www.genecards.org/cgi-bin/carddisp.pl?gene=CD82
ASAH2	N-Acylsphingosine Amidohydrolase 2	Protein Coding	44	GC10M050182	1.16104	https://www.genecards.org/cgi-bin/carddisp.pl?gene=ASAH2
MGST1	Microsomal Glutathione S-Transferase 1	Protein Coding	44	GC12P016347	1.16104	https://www.genecards.org/cgi-bin/carddisp.pl?gene=MGST1
EMP1	Epithelial Membrane Protein 1	Protein Coding	41	GC12P013196	1.16104	https://www.genecards.org/cgi-bin/carddisp.pl?gene=EMP1
SMG9	SMG9 Nonsense Mediated MRNA Decay Factor	Protein Coding	36	GC19M043727	1.16104	https://www.genecards.org/cgi-bin/carddisp.pl?gene=SMG9
HDDC3	HD Domain Containing 3	Protein Coding	33	GC15M090929	1.16104	https://www.genecards.org/cgi-bin/carddisp.pl?gene=HDDC3
YY2	YY2 Transcription Factor	Protein Coding	33	GC0XP021855	1.16104	https://www.genecards.org/cgi-bin/carddisp.pl?gene=YY2
CISD3	CDGSH Iron Sulfur Domain 3	Protein Coding	31	GC17P038730	1.16104	https://www.genecards.org/cgi-bin/carddisp.pl?gene=CISD3
HULC	Hepatocellular Carcinoma Up-Regulated Long Non-Coding RNA	RNA Gene	23	GC06P008438	1.16104	https://www.genecards.org/cgi-bin/carddisp.pl?gene=HULC
MIR370	MicroRNA 370	RNA Gene	23	GC14P110111	1.16104	https://www.genecards.org/cgi-bin/carddisp.pl?gene=MIR370
MIR338	MicroRNA 338	RNA Gene	20	GC17M081126	1.16104	https://www.genecards.org/cgi-bin/carddisp.pl?gene=MIR338
MIR3200	MicroRNA 3200	RNA Gene	17	GC22P030731	1.16104	https://www.genecards.org/cgi-bin/carddisp.pl?gene=MIR3200
LINC00616	Long Intergenic Non-Protein Coding RNA 616	RNA Gene	16	GC04M137978	1.16104	https://www.genecards.org/cgi-bin/carddisp.pl?gene=LINC00616
MIR1287	MicroRNA 1287	RNA Gene	16	GC10M098395	1.16104	https://www.genecards.org/cgi-bin/carddisp.pl?gene=MIR1287
ESR1	Estrogen Receptor 1	Protein Coding	56	GC06P151656	1.1298	https://www.genecards.org/cgi-bin/carddisp.pl?gene=ESR1
EP300	E1A Binding Protein P300	Protein Coding	54	GC22P041114	1.1298	https://www.genecards.org/cgi-bin/carddisp.pl?gene=EP300
CREB1	CAMP Responsive Element Binding Protein 1	Protein Coding	51	GC02P207529	1.1298	https://www.genecards.org/cgi-bin/carddisp.pl?gene=CREB1
PEBP1	Phosphatidylethanolamine Binding Protein 1	Protein Coding	49	GC12P118135	1.1298	https://www.genecards.org/cgi-bin/carddisp.pl?gene=PEBP1
TFAP2A	Transcription Factor AP-2 Alpha	Protein Coding	49	GC06M010393	1.1298	https://www.genecards.org/cgi-bin/carddisp.pl?gene=TFAP2A
ERCC6	ERCC Excision Repair 6, Chromatin Remodeling Factor	Protein Coding	48	GC10M049454	1.1298	https://www.genecards.org/cgi-bin/carddisp.pl?gene=ERCC6
KDM5C	Lysine Demethylase 5C	Protein Coding	48	GC0XM053176	1.1298	https://www.genecards.org/cgi-bin/carddisp.pl?gene=KDM5C
UBE2D3	Ubiquitin Conjugating Enzyme E2 D3	Protein Coding	48	GC04M102794	1.1298	https://www.genecards.org/cgi-bin/carddisp.pl?gene=UBE2D3
ALAS2	5'-Aminolevulinate Synthase 2	Protein Coding	47	GC0XM055009	1.1298	https://www.genecards.org/cgi-bin/carddisp.pl?gene=ALAS2
DDB1	Damage Specific DNA Binding Protein 1	Protein Coding	47	GC11M096879	1.1298	https://www.genecards.org/cgi-bin/carddisp.pl?gene=DDB1
KDM3B	Lysine Demethylase 3B	Protein Coding	47	GC05P138352	1.1298	https://www.genecards.org/cgi-bin/carddisp.pl?gene=KDM3B
CCL5	C-C Motif Chemokine Ligand 5	Protein Coding	46	GC17M035871	1.1298	https://www.genecards.org/cgi-bin/carddisp.pl?gene=CCL5
RBX1	Ring-Box 1	Protein Coding	46	GC22P040951	1.1298	https://www.genecards.org/cgi-bin/carddisp.pl?gene=RBX1
CUL4A	Cullin 4A	Protein Coding	45	GC13P113208	1.1298	https://www.genecards.org/cgi-bin/carddisp.pl?gene=CUL4A
CUL4B	Cullin 4B	Protein Coding	45	GC0XM120524	1.1298	https://www.genecards.org/cgi-bin/carddisp.pl?gene=CUL4B
NFE2L1	NFE2 Like BZIP Transcription Factor 1	Protein Coding	45	GC17P058869	1.1298	https://www.genecards.org/cgi-bin/carddisp.pl?gene=NFE2L1
NGLY1	N-Glycanase 1	Protein Coding	45	GC03M025718	1.1298	https://www.genecards.org/cgi-bin/carddisp.pl?gene=NGLY1
CYB5R1	Cytochrome B5 Reductase 1	Protein Coding	44	GC01M202964	1.1298	https://www.genecards.org/cgi-bin/carddisp.pl?gene=CYB5R1
PDSS2	Decaprenyl Diphosphate Synthase Subunit 2	Protein Coding	44	GC06M107152	1.1298	https://www.genecards.org/cgi-bin/carddisp.pl?gene=PDSS2
SETDB1	SET Domain Bifurcated Histone Lysine Methyltransferase 1	Protein Coding	44	GC01P150926	1.1298	https://www.genecards.org/cgi-bin/carddisp.pl?gene=SETDB1
H1-4	H1.4 Linker Histone, Cluster Member	Protein Coding	43	GC06P088590	1.1298	https://www.genecards.org/cgi-bin/carddisp.pl?gene=H1-4
SEMA5A	Semaphorin 5A	Protein Coding	43	GC05M009036	1.1298	https://www.genecards.org/cgi-bin/carddisp.pl?gene=SEMA5A
ABCB10	ATP Binding Cassette Subfamily B Member 10	Protein Coding	42	GC01M229516	1.1298	https://www.genecards.org/cgi-bin/carddisp.pl?gene=ABCB10
DCAF8	DDB1 And CUL4 Associated Factor 8	Protein Coding	41	GC01M160215	1.1298	https://www.genecards.org/cgi-bin/carddisp.pl?gene=DCAF8
H1-5	H1.5 Linker Histone, Cluster Member	Protein Coding	41	GC06M069794	1.1298	https://www.genecards.org/cgi-bin/carddisp.pl?gene=H1-5
CYGB	Cytoglobin	Protein Coding	40	GC17M076527	1.1298	https://www.genecards.org/cgi-bin/carddisp.pl?gene=CYGB
H1-2	H1.2 Linker Histone, Cluster Member	Protein Coding	40	GC06M026056	1.1298	https://www.genecards.org/cgi-bin/carddisp.pl?gene=H1-2
H1-1	H1.1 Linker Histone, Cluster Member	Protein Coding	37	GC06M026018	1.1298	https://www.genecards.org/cgi-bin/carddisp.pl?gene=H1-1
H1-3	H1.3 Linker Histone, Cluster Member	Protein Coding	37	GC06M069793	1.1298	https://www.genecards.org/cgi-bin/carddisp.pl?gene=H1-3
PAQR3	Progestin And AdipoQ Receptor Family Member 3	Protein Coding	37	GC04M078887	1.1298	https://www.genecards.org/cgi-bin/carddisp.pl?gene=PAQR3
WDR76	WD Repeat Domain 76	Protein Coding	37	GC15P043826	1.1298	https://www.genecards.org/cgi-bin/carddisp.pl?gene=WDR76
COMMD10	COMM Domain Containing 10	Protein Coding	36	GC05P116084	1.1298	https://www.genecards.org/cgi-bin/carddisp.pl?gene=COMMD10
H1-10	H1.10 Linker Histone	Protein Coding	34	GC03M130457	1.1298	https://www.genecards.org/cgi-bin/carddisp.pl?gene=H1-10
MIR19A	MicroRNA 19a	RNA Gene	23	GC13P091566	1.1298	https://www.genecards.org/cgi-bin/carddisp.pl?gene=MIR19A
MIR326	MicroRNA 326	RNA Gene	23	GC11M075335	1.1298	https://www.genecards.org/cgi-bin/carddisp.pl?gene=MIR326
MIR324	MicroRNA 324	RNA Gene	22	GC17M007223	1.1298	https://www.genecards.org/cgi-bin/carddisp.pl?gene=MIR324
LASTR	LncRNA Associated With SART3 Regulation Of Splicing	RNA Gene	13	GC10M005597	1.1298	https://www.genecards.org/cgi-bin/carddisp.pl?gene=LASTR
MIR4735	MicroRNA 4735	RNA Gene	12	GC01M196555	1.1298	https://www.genecards.org/cgi-bin/carddisp.pl?gene=MIR4735
BACH1	BTB Domain And CNC Homolog 1	Protein Coding	44	GC21P029194	1.11415	https://www.genecards.org/cgi-bin/carddisp.pl?gene=BACH1
STAT3	Signal Transducer And Activator Of Transcription 3	Protein Coding	56	GC17M042313	1.09435	https://www.genecards.org/cgi-bin/carddisp.pl?gene=STAT3
KEAP1	Kelch Like ECH Associated Protein 1	Protein Coding	51	GC19M010486	1.09435	https://www.genecards.org/cgi-bin/carddisp.pl?gene=KEAP1
PTGS2	Prostaglandin-Endoperoxide Synthase 2	Protein Coding	51	GC01M186640	1.09435	https://www.genecards.org/cgi-bin/carddisp.pl?gene=PTGS2
ALOX5	Arachidonate 5-Lipoxygenase	Protein Coding	50	GC10P045374	1.09435	https://www.genecards.org/cgi-bin/carddisp.pl?gene=ALOX5
ABCB6	ATP Binding Cassette Subfamily B Member 6 (Langereis Blood Group)	Protein Coding	48	GC02M219209	1.09435	https://www.genecards.org/cgi-bin/carddisp.pl?gene=ABCB6
FXN	Frataxin	Protein Coding	48	GC09P069035	1.09435	https://www.genecards.org/cgi-bin/carddisp.pl?gene=FXN
LTF	Lactotransferrin	Protein Coding	48	GC03M046435	1.09435	https://www.genecards.org/cgi-bin/carddisp.pl?gene=LTF
NEDD4	NEDD4 E3 Ubiquitin Protein Ligase	Protein Coding	48	GC15M055826	1.09435	https://www.genecards.org/cgi-bin/carddisp.pl?gene=NEDD4
NEDD4L	NEDD4 Like E3 Ubiquitin Protein Ligase	Protein Coding	48	GC18P058044	1.09435	https://www.genecards.org/cgi-bin/carddisp.pl?gene=NEDD4L
ACADSB	Acyl-CoA Dehydrogenase Short/Branched Chain	Protein Coding	47	GC10P123008	1.09435	https://www.genecards.org/cgi-bin/carddisp.pl?gene=ACADSB
ACO1	Aconitase 1	Protein Coding	47	GC09P032374	1.09435	https://www.genecards.org/cgi-bin/carddisp.pl?gene=ACO1
ADIPOR1	Adiponectin Receptor 1	Protein Coding	47	GC01M202940	1.09435	https://www.genecards.org/cgi-bin/carddisp.pl?gene=ADIPOR1
JAM3	Junctional Adhesion Molecule 3	Protein Coding	46	GC11P134068	1.09435	https://www.genecards.org/cgi-bin/carddisp.pl?gene=JAM3
ETV4	ETS Variant Transcription Factor 4	Protein Coding	45	GC17M043527	1.09435	https://www.genecards.org/cgi-bin/carddisp.pl?gene=ETV4
H2AX	H2A.X Variant Histone	Protein Coding	45	GC11M119250	1.09435	https://www.genecards.org/cgi-bin/carddisp.pl?gene=H2AX
KDM4A	Lysine Demethylase 4A	Protein Coding	45	GC01P043650	1.09435	https://www.genecards.org/cgi-bin/carddisp.pl?gene=KDM4A
YME1L1	YME1 Like 1 ATPase	Protein Coding	45	GC10M027110	1.09435	https://www.genecards.org/cgi-bin/carddisp.pl?gene=YME1L1
PLIN2	Perilipin 2	Protein Coding	44	GC09M019173	1.09435	https://www.genecards.org/cgi-bin/carddisp.pl?gene=PLIN2
RHOT1	Ras Homolog Family Member T1	Protein Coding	44	GC17P032142	1.09435	https://www.genecards.org/cgi-bin/carddisp.pl?gene=RHOT1
CSRP2	Cysteine And Glycine Rich Protein 2	Protein Coding	43	GC12M076859	1.09435	https://www.genecards.org/cgi-bin/carddisp.pl?gene=CSRP2
STOML2	Stomatin Like 2	Protein Coding	42	GC09M035099	1.09435	https://www.genecards.org/cgi-bin/carddisp.pl?gene=STOML2
METTL14	Methyltransferase 14, N6-Adenosine-Methyltransferase Subunit	Protein Coding	41	GC04P118685	1.09435	https://www.genecards.org/cgi-bin/carddisp.pl?gene=METTL14
DAZAP1	DAZ Associated Protein 1	Protein Coding	40	GC19P001407	1.09435	https://www.genecards.org/cgi-bin/carddisp.pl?gene=DAZAP1
GABPB1	GA Binding Protein Transcription Factor Subunit Beta 1	Protein Coding	40	GC15M050275	1.09435	https://www.genecards.org/cgi-bin/carddisp.pl?gene=GABPB1
YTHDF2	YTH N6-Methyladenosine RNA Binding Protein 2	Protein Coding	40	GC01P028871	1.09435	https://www.genecards.org/cgi-bin/carddisp.pl?gene=YTHDF2
C19orf12	Chromosome 19 Open Reading Frame 12	Protein Coding	38	GC19M067683	1.09435	https://www.genecards.org/cgi-bin/carddisp.pl?gene=C19orf12
SLIRP	SRA Stem-Loop Interacting RNA Binding Protein	Protein Coding	37	GC14P077708	1.09435	https://www.genecards.org/cgi-bin/carddisp.pl?gene=SLIRP
ZSCAN25	Zinc Finger And SCAN Domain Containing 25	Protein Coding	37	GC07P099770	1.09435	https://www.genecards.org/cgi-bin/carddisp.pl?gene=ZSCAN25
ALKBH5	AlkB Homolog 5, RNA Demethylase	Protein Coding	36	GC17P018183	1.09435	https://www.genecards.org/cgi-bin/carddisp.pl?gene=ALKBH5
SCGB1D2	Secretoglobin Family 1D Member 2	Protein Coding	33	GC11P062260	1.09435	https://www.genecards.org/cgi-bin/carddisp.pl?gene=SCGB1D2
TMED8	Transmembrane P24 Trafficking Protein Family Member 8	Protein Coding	31	GC14M077335	1.09435	https://www.genecards.org/cgi-bin/carddisp.pl?gene=TMED8
MIR127	MicroRNA 127	RNA Gene	23	GC14P110110	1.09435	https://www.genecards.org/cgi-bin/carddisp.pl?gene=MIR127
MIR375	MicroRNA 375	RNA Gene	23	GC02M219001	1.09435	https://www.genecards.org/cgi-bin/carddisp.pl?gene=MIR375
MIR106A	MicroRNA 106a	RNA Gene	20	GC0XM134328	1.09435	https://www.genecards.org/cgi-bin/carddisp.pl?gene=MIR106A
GABPB1-AS1	GABPB1 Antisense RNA 1	RNA Gene	18	GC15P050354	1.09435	https://www.genecards.org/cgi-bin/carddisp.pl?gene=GABPB1-AS1
ASMTL-AS1	ASMTL Antisense RNA 1	RNA Gene	16	GC0XP001400	1.09435	https://www.genecards.org/cgi-bin/carddisp.pl?gene=ASMTL-AS1
SQSTM1	Sequestosome 1	Protein Coding	51	GC05P179806	1.07861	https://www.genecards.org/cgi-bin/carddisp.pl?gene=SQSTM1
NOTCH2	Notch Receptor 2	Protein Coding	54	GC01M119911	1.0523	https://www.genecards.org/cgi-bin/carddisp.pl?gene=NOTCH2
TYRO3	TYRO3 Protein Tyrosine Kinase	Protein Coding	52	GC15P041557	1.0523	https://www.genecards.org/cgi-bin/carddisp.pl?gene=TYRO3
TRPV4	Transient Receptor Potential Cation Channel Subfamily V Member 4	Protein Coding	51	GC12M109783	1.0523	https://www.genecards.org/cgi-bin/carddisp.pl?gene=TRPV4
ATF6	Activating Transcription Factor 6	Protein Coding	50	GC01P161766	1.0523	https://www.genecards.org/cgi-bin/carddisp.pl?gene=ATF6
CA9	Carbonic Anhydrase 9	Protein Coding	50	GC09P035673	1.0523	https://www.genecards.org/cgi-bin/carddisp.pl?gene=CA9
FZD7	Frizzled Class Receptor 7	Protein Coding	48	GC02P202034	1.0523	https://www.genecards.org/cgi-bin/carddisp.pl?gene=FZD7
ABCC5	ATP Binding Cassette Subfamily C Member 5	Protein Coding	47	GC03M183919	1.0523	https://www.genecards.org/cgi-bin/carddisp.pl?gene=ABCC5
BSG	Basigin (Ok Blood Group)	Protein Coding	47	GC19P000571	1.0523	https://www.genecards.org/cgi-bin/carddisp.pl?gene=BSG
FXR1	FMR1 Autosomal Homolog 1	Protein Coding	47	GC03P180868	1.0523	https://www.genecards.org/cgi-bin/carddisp.pl?gene=FXR1
SIRT6	Sirtuin 6	Protein Coding	47	GC19M004174	1.0523	https://www.genecards.org/cgi-bin/carddisp.pl?gene=SIRT6
SQLE	Squalene Epoxidase	Protein Coding	47	GC08P124998	1.0523	https://www.genecards.org/cgi-bin/carddisp.pl?gene=SQLE
TTBK2	Tau Tubulin Kinase 2	Protein Coding	46	GC15M042738	1.0523	https://www.genecards.org/cgi-bin/carddisp.pl?gene=TTBK2
ITGB8	Integrin Subunit Beta 8	Protein Coding	45	GC07P020329	1.0523	https://www.genecards.org/cgi-bin/carddisp.pl?gene=ITGB8
LASP1	LIM And SH3 Protein 1	Protein Coding	44	GC17P038869	1.0523	https://www.genecards.org/cgi-bin/carddisp.pl?gene=LASP1
CEP290	Centrosomal Protein 290	Protein Coding	43	GC12M088049	1.0523	https://www.genecards.org/cgi-bin/carddisp.pl?gene=CEP290
COPZ1	COPI Coat Complex Subunit Zeta 1	Protein Coding	43	GC12P054301	1.0523	https://www.genecards.org/cgi-bin/carddisp.pl?gene=COPZ1
HLF	HLF Transcription Factor, PAR BZIP Family Member	Protein Coding	41	GC17P055264	1.0523	https://www.genecards.org/cgi-bin/carddisp.pl?gene=HLF
PCDHB14	Protocadherin Beta 14	Protein Coding	38	GC05P146532	1.0523	https://www.genecards.org/cgi-bin/carddisp.pl?gene=PCDHB14
ATXN8OS	ATXN8 Opposite Strand LncRNA	RNA Gene	28	GC13P070107	1.0523	https://www.genecards.org/cgi-bin/carddisp.pl?gene=ATXN8OS
MEG8	Maternally Expressed 8, Small Nucleolar RNA Host Gene	RNA Gene	22	GC14P110420	1.0523	https://www.genecards.org/cgi-bin/carddisp.pl?gene=MEG8
MIR129-1	MicroRNA 129-1	RNA Gene	20	GC07P128207	1.0523	https://www.genecards.org/cgi-bin/carddisp.pl?gene=MIR129-1
CERS6-AS1	CERS6 Antisense RNA 1	RNA Gene	14	GC02M168771	1.0523	https://www.genecards.org/cgi-bin/carddisp.pl?gene=CERS6-AS1
MIR4443	MicroRNA 4443	RNA Gene	14	GC03P049739	1.0523	https://www.genecards.org/cgi-bin/carddisp.pl?gene=MIR4443
LINC01833	Long Intergenic Non-Protein Coding RNA 1833	RNA Gene	13	GC02M044921	1.0523	https://www.genecards.org/cgi-bin/carddisp.pl?gene=LINC01833
MIR761	MicroRNA 761	RNA Gene	13	GC01M051836	1.0523	https://www.genecards.org/cgi-bin/carddisp.pl?gene=MIR761
