# Supplementary material for: Identification and integration analysis of a novel prognostic signature associated with cuproptosis-related ferroptosis genes and relevant lncRNA regulatory axis in lung adenocarcinoma
Source: Aging (Albany NY). 2023 Mar 3;15(5):1543–63. doi: 10.18632/aging.204561 (PMC10042693; doi:10.18632/aging.204561)
Supplement: Supplementary Table 2 [file aging-15-204561-s003.xlsx]

## Sheet: Supplementary Table 2
Supplementary Table 2. Genes differentially expressed in LUAD samples versus normal samples.
up.genes
PYCR1	Up
PPP1R14B	Up
UBE2T	Up
TMEM177	Up
GOLM1	Up
EFNA4	Up
ETV4	Up
ALDH18A1	Up
CTHRC1	Up
FAM83A	Up
B3GNT3	Up
SPAG4	Up
ADM2	Up
TEDC2	Up
TOP2A	Up
CDC20	Up
PLPP2	Up
TMEM184A	Up
PAFAH1B3	Up
NME1	Up
IQGAP3	Up
PAICS	Up
RCC1	Up
OCIAD2	Up
COL10A1	Up
KIF20A	Up
FUT2	Up
SPP1	Up
CDCA8	Up
CCNB1	Up
UBE2C	Up
SFXN1	Up
RMI2	Up
SAPCD2	Up
PDIA4	Up
BIRC5	Up
PLK1	Up
MANF	Up
CBLC	Up
ZWINT	Up
SPTBN2	Up
EZH2	Up
LGR4	Up
MMP11	Up
SPAG5	Up
EPN3	Up
NEK2	Up
TPX2	Up
KIF2C	Up
CCNB2	Up
SFXN4	Up
HMGB3	Up
GPT2	Up
AURKB	Up
FLAD1	Up
RECQL4	Up
MYBL2	Up
UHRF1	Up
KIF26B	Up
CEP55	Up
KIF4A	Up
SLC50A1	Up
MDK	Up
HJURP	Up
ATIC	Up
SRPK1	Up
EFNA3	Up
DLGAP5	Up
SLC25A10	Up
MSTO1	Up
FKBP11	Up
ANLN	Up
PLEKHN1	Up
TMPRSS4	Up
NPM3	Up
FAM136A	Up
GINS1	Up
ORC6	Up
NUF2	Up
PPAT	Up
KAT2A	Up
CDC6	Up
IGSF9	Up
KDELR3	Up
PSAT1	Up
RRM2	Up
TK1	Up
MELK	Up
FERMT1	Up
ASF1B	Up
PLEK2	Up
EEF1AKMT4	Up
GGCT	Up
CCT3	Up
MARCKSL1	Up
CENPF	Up
CNOT11	Up
PSMG3	Up
MEX3A	Up
E2F8	Up
STX1A	Up
NARF	Up
BUB1B	Up
IQANK1	Up
H2BC5	Up
SLC25A39	Up
SKA3	Up
KIF11	Up
SAMD10	Up
CDT1	Up
CDC45	Up
GINS2	Up
TROAP	Up
P3H4	Up
GTSE1	Up
SLC2A1	Up
CDCA3	Up
CDC25C	Up
SPC24	Up
CRABP2	Up
HMMR	Up
ARHGEF39	Up
SERINC2	Up
MYO19	Up
CDCA5	Up
FOXM1	Up
STIL	Up
POLR2H	Up
C11orf80	Up
UQCC2	Up
MKI67	Up
KIF18B	Up
EXO1	Up
CBX8	Up
SLC35F2	Up
NLN	Up
CCNA2	Up
TRAF4	Up
PKMYT1	Up
DBNDD1	Up
OTX1	Up
NDC80	Up
CENPA	Up
RASAL1	Up
GJB2	Up
JPT1	Up
DEPDC1B	Up
MCM4	Up
SSR4	Up
TMEM182	Up
B4GALT2	Up
ASPM	Up
KIFC1	Up
ARHGEF16	Up
EPCAM	Up
TNFRSF21	Up
GNL3	Up
RHBDL2	Up
PCLAF	Up
XRCC2	Up
CDCA7	Up
PDCD2L	Up
CCDC167	Up
TONSL	Up
TRAP1	Up
SLC52A2	Up
AURKA	Up
HS6ST2	Up
PTTG1	Up
MYO7A	Up
C1QTNF6	Up
CHAF1B	Up
ERCC6L	Up
BZW2	Up
PBK	Up
SHMT2	Up
NECTIN4	Up
CENPU	Up
ERO1A	Up
GAPDH	Up
UNC5CL	Up
NCAPH	Up
HROB	Up
CDKN3	Up
DCAF13	Up
KNTC1	Up
HMGA1	Up
E2F3	Up
CCNE1	Up
TRAIP	Up
KIF14	Up
POLE2	Up
CCNF	Up
PHLDA2	Up
PRDX4	Up
SOX4	Up
PHKA1	Up
C1orf112	Up
SNRPE	Up
NCAPG	Up
FAM111B	Up
GALNT7	Up
METTL1	Up
EPHA10	Up
DUS1L	Up
ORC1	Up
CKAP2L	Up
TLCD1	Up
MRM1	Up
AGMAT	Up
KHDC4	Up
HSPE1	Up
CHEK1	Up
COL1A1	Up
TFB2M	Up
DNA2	Up
DEPDC1	Up
RPP40	Up
TTK	Up
DONSON	Up
RCCD1	Up
KPNA2	Up
ECT2	Up
SIX4	Up
SPATS2	Up
GPRIN1	Up
SLC39A11	Up
MCM10	Up
DKC1	Up
BUB1	Up
CDCA2	Up
TIMP1	Up
HELLS	Up
PDK1	Up
FRMD5	Up
KIF22	Up
PIMREG	Up
TXNDC17	Up
BOP1	Up
ALG3	Up
LMNB1	Up
MAD2L1	Up
PROM2	Up
FANCA	Up
TIMELESS	Up
SLC7A5	Up
SGO1	Up
FEN1	Up
HMBS	Up
SKA1	Up
P2RY6	Up
PTPRH	Up
JPT2	Up
HSPD1	Up
CDK1	Up
SPC25	Up
IRAK1	Up
SHCBP1	Up
PC	Up
SYNJ2	Up
RAD51	Up
GFUS	Up
NME4	Up
HSH2D	Up
VARS1	Up
DECR2	Up
ESPL1	Up
KIF15	Up
ADCK5	Up
DTYMK	Up
RAD54L	Up
PKP3	Up
RUSC1	Up
RAB26	Up
TSACC	Up
GREM1	Up
TRIP13	Up
RBBP8NL	Up
LDHA	Up
STYK1	Up
E2F2	Up
PAK1	Up
RHBDL1	Up
PPIF	Up
PTGES	Up
RALGPS2	Up
ENO1	Up
VMP1	Up
SLC5A6	Up
KIF23	Up
RFC4	Up
MMP1	Up
TMEM79	Up
TACC3	Up
FANCD2	Up
CKS1B	Up
SYT7	Up
COL3A1	Up
KRT80	Up
TMED3	Up
BYSL	Up
EME1	Up
LAD1	Up
FOXP3	Up
IKBKE	Up
CENPI	Up
KCNN4	Up
POC1A	Up
KNL1	Up
INAVA	Up
PYCR3	Up
POLG2	Up
MARVELD3	Up
BRIP1	Up
ZNF692	Up
HGH1	Up
CST1	Up
CENPM	Up
AP1S1	Up
CCN4	Up
CILP2	Up
BLM	Up
FANCI	Up
XPR1	Up
WNT3	Up
CYP27B1	Up
ST14	Up
PGM2L1	Up
ABHD11	Up
HDHD3	Up
ZNF239	Up
FAM83D	Up
TPBG	Up
EXOSC5	Up
CLSPN	Up
IL1RL2	Up
CENPK	Up
BMP8A	Up
ABCC3	Up
CELSR3	Up
BRIX1	Up
HNF4G	Up
ADAMTS14	Up
PFKP	Up
TWNK	Up
FIGNL1	Up
YDJC	Up
TDRKH	Up
P4HA3	Up
CDC25A	Up
ESCO2	Up
CHTF18	Up
DTL	Up
XDH	Up
C5orf34	Up
ATAD3A	Up
PITX1	Up
CYP24A1	Up
NEIL3	Up
CXCL13	Up
SEMA4B	Up
PUS7	Up
MMP12	Up
F12	Up
GCNT3	Up
TFAP2A	Up
CNFN	Up
BCL2L15	Up
H2AX	Up
GYG2	Up
MIS18A	Up
POLQ	Up
RGS17	Up
PPP1R14D	Up
CENPE	Up
TFR2	Up
FHL2	Up
PLK4	Up
NCAPG2	Up
ATAD2	Up
CP	Up
MROH6	Up
C2CD4A	Up
BICDL1	Up
GMDS	Up
TNFRSF18	Up
TTYH3	Up
MCM6	Up
CHEK2	Up
SPDEF	Up
SLC2A5	Up
ADAM8	Up
GRHL3	Up
TUBG1	Up
ANKRD22	Up
ARHGAP40	Up
TMEM132A	Up
ZC3HAV1L	Up
THBS2	Up
MTHFD2	Up
STEAP1	Up
BCL9	Up
TICRR	Up
RAC3	Up
BLACAT1	Up
FBXO32	Up
CREB3L4	Up
CPNE7	Up
STK39	Up
RAD51AP1	Up
LARGE2	Up
DBF4	Up
COL11A1	Up
GMNN	Up
PODXL2	Up
ITGA11	Up
ADAM28	Up
BAIAP2L1	Up
SALL4	Up
SULF1	Up
PARPBP	Up
GALNT14	Up
BHLHA15	Up
GINS4	Up
CEACAM1	Up
CPXM1	Up
RAB19	Up
PRR11	Up
PABPC1L	Up
ARHGAP11A	Up
RHPN1	Up
MB	Up
RHOV	Up
GNPNAT1	Up
ABCA12	Up
NMU	Up
MNX1	Up
PLXNB3	Up
ENTPD8	Up
DNAJC22	Up
CENPH	Up
ATAT1	Up
GRTP1	Up
C2CD4D	Up
SLFN13	Up
FUT3	Up
ITPKA	Up
SLC17A9	Up
DERL3	Up
DNAJC12	Up
MEST	Up
WDHD1	Up
ATAD3B	Up
LAGE3	Up
CCT5	Up
WDR62	Up
ADAM12	Up
LSR	Up
SMPDL3B	Up
IGFBP3	Up
RPL39L	Up
DDX11	Up
PPP1R35	Up
FAP	Up
HCN3	Up
ZNF217	Up
ACY3	Up
SERPINH1	Up
SBK1	Up
TNFRSF25	Up
CABLES2	Up
NQO1	Up
AUNIP	Up
RUNX2	Up
CCDC34	Up
CDCA4	Up
COL5A2	Up
WFDC3	Up
PIF1	Up
C15orf48	Up
KLHL17	Up
MICALL2	Up
FUT8	Up
ZP3	Up
CCNO	Up
MCM2	Up
H1-0	Up
FBXO41	Up
SLC26A6	Up
LRRC20	Up
PRR36	Up
PAQR4	Up
NUP155	Up
SIX1	Up
SRD5A1	Up
STRA6	Up
NSMF	Up
BARX2	Up
CHPF	Up
SOX12	Up
MESP1	Up
HASPIN	Up
ZYG11A	Up
SMIM22	Up
BIK	Up
ZDHHC9	Up
NGEF	Up
TBX15	Up
CCNP	Up
COL5A1	Up
CERCAM	Up
GOLGA7B	Up
THY1	Up
SLC22A18	Up
SPINK1	Up
B4GALNT4	Up
DSCC1	Up
OVOL1	Up
NET1	Up
CA9	Up
CABYR	Up
SLC29A4	Up
UBE2S	Up
LGSN	Up
IER5L	Up
SYT12	Up
CDH3	Up
NUDT8	Up
EGLN3	Up
MMP13	Up
KRT8	Up
CIP2A	Up
MMP9	Up
EPHB2	Up
ARHGEF19	Up
IRF7	Up
BAIAP2L2	Up
EPHX4	Up
AK4	Up
BEAN1	Up
GSDMB	Up
DTX2	Up
SCG5	Up
LAPTM4B	Up
IL23A	Up
CARD14	Up
H2AC13	Up
MCIDAS	Up
GAREM2	Up
TTC39C	Up
MMP17	Up
ITM2C	Up
TMEM63C	Up
METTL7B	Up
MCM7	Up
RACGAP1	Up
PODNL1	Up
CGREF1	Up
RTN4RL2	Up
PTGFRN	Up
EPOP	Up
CBX2	Up
JSRP1	Up
DCST2	Up
LYPD1	Up
SRPK3	Up
HTR3A	Up
TSKU	Up
SYNGR3	Up
FAM83H	Up
KPNA7	Up
DNTTIP1	Up
DBN1	Up
IL4I1	Up
KRT18	Up
HES6	Up
TMEM156	Up
RAMP1	Up
MYEOV	Up
FA2H	Up
FCRL5	Up
CDK5RAP3	Up
TMPRSS11E	Up
DNMT3B	Up
B3GNT6	Up
PANX2	Up
LGI2	Up
SRD5A3	Up
COMP	Up
ADGRG1	Up
HPDL	Up
TMEM45B	Up
ATP10B	Up
CHRNA5	Up
TRIM46	Up
KISS1R	Up
EEF1A2	Up
KIFC2	Up
MANEAL	Up
VPREB3	Up
PLAU	Up
ADGRF4	Up
ADAMTS16	Up
TMEM52	Up
DSP	Up
RNF207	Up
AKR7A3	Up
H3C10	Up
DDIT4L	Up
CEACAM5	Up
C4orf48	Up
NECTIN1	Up
MELTF	Up
THEM5	Up
TOX3	Up
AOC1	Up
ASPHD1	Up
DEPTOR	Up
IGLL5	Up
E2F7	Up
KRTCAP3	Up
EPHX3	Up
KRTAP5-1	Up
ANO9	Up
SLC39A4	Up
ARNTL2	Up
CDH24	Up
CAPN12	Up
FAM178B	Up
ESPN	Up
CARD11	Up
ALDH3B2	Up
MZB1	Up
FAM155B	Up
PDGFRL	Up
DIO2	Up
EIF4EBP1	Up
RCOR2	Up
LYPD3	Up
H4C12	Up
YBX2	Up
POSTN	Up
SLC7A11	Up
SRCIN1	Up
PLPP4	Up
MAP7D2	Up
PROC	Up
RCN3	Up
PLEKHG6	Up
STK32A	Up
GPR84	Up
COL7A1	Up
UGDH	Up
ATP6V1C2	Up
MX2	Up
KCNQ3	Up
E2F1	Up
IGFL2	Up
NETO2	Up
XKRX	Up
TESMIN	Up
COL17A1	Up
SMOX	Up
MFAP2	Up
CLDN4	Up
SLC6A8	Up
SUGCT	Up
FKBP10	Up
ADAMDEC1	Up
CENPW	Up
SGPP2	Up
HSF4	Up
MUC20	Up
CLPSL2	Up
KRT16	Up
PITX2	Up
ADAMTS12	Up
REEP6	Up
TNFSF11	Up
ERFE	Up
CLDN3	Up
CD79A	Up
NFE2L3	Up
FOXA3	Up
FOXO6	Up
MUC3A	Up
NHS	Up
RASGEF1A	Up
STRIP2	Up
CKMT1A	Up
MESP2	Up
FEZF1	Up
CAPN5	Up
CAMK2N2	Up
PRAME	Up
TRIM31	Up
MTMR11	Up
S100A2	Up
H4C8	Up
SMKR1	Up
SRPX2	Up
PLOD2	Up
CKMT1B	Up
TAS1R3	Up
APOBEC3B	Up
CDKN2A	Up
FNDC1	Up
KRTAP4-1	Up
COCH	Up
PLAAT1	Up
SYCE3	Up
PGLYRP4	Up
H2BC8	Up
DSG2	Up
IGF2BP3	Up
PAX9	Up
S100P	Up
ADSS1	Up
AIM2	Up
SLC16A3	Up
DIRAS1	Up
PCP4	Up
MIOX	Up
GSDMC	Up
PLEKHA6	Up
CD19	Up
TMEM171	Up
HHIPL2	Up
LOXL2	Up
SFN	Up
TNFRSF17	Up
HILPDA	Up
NXPH4	Up
CT83	Up
FNDC4	Up
AGR2	Up
GLB1L2	Up
H2AC8	Up
PRSS22	Up
DOK5	Up
HAVCR1	Up
EGF	Up
POU2AF1	Up
KRT15	Up
PAEP	Up
H2BC9	Up
NOXA1	Up
CST2	Up
C11orf86	Up
FGL1	Up
MMP3	Up
GPR37	Up
WDR86	Up
APBA2	Up
NPW	Up
PMAIP1	Up
TNS4	Up
H2BC4	Up
FUT6	Up
BARX1	Up
SLC44A5	Up
CXCL14	Up
LRRC15	Up
MUC13	Up
RAB15	Up
CLDN10	Up
GPR35	Up
GALNT6	Up
ENTPD2	Up
LCN2	Up
SEZ6L2	Up
VCAN	Up
VIL1	Up
IL37	Up
SLC16A9	Up
IBSP	Up
DUSP9	Up
SPINK2	Up
COL1A2	Up
FDCSP	Up
MXRA5	Up
AHNAK2	Up
HGD	Up
HOXC13	Up
SPOCK1	Up
SIX2	Up
LEMD1	Up
FOXA1	Up
RNF183	Up
CTSV	Up
TDRD5	Up
QPCT	Up
TCN1	Up
H1-4	Up
PTK6	Up
SLC16A14	Up
GPX2	Up
UCHL1	Up
HCAR1	Up
IGFBPL1	Up
TFF1	Up
PRRX2	Up
TESC	Up
SPTB	Up
BASP1	Up
HOXC9	Up
TWIST1	Up
CILP	Up
HORMAD1	Up
PKIB	Up
DUSP13	Up
GLB1L3	Up
CR2	Up
ECEL1	Up
WFDC10B	Up
LY6D	Up
MUC16	Up
AKR1B10	Up
TMEM59L	Up
TUBB2B	Up
IL20RB	Up
IL36RN	Up
PPP2R2C	Up
GAL	Up
MUC4	Up
BPIFA2	Up
GRIN2D	Up
TRPM8	Up
GJB6	Up
DUSP4	Up
DMRTA2	Up
CST4	Up
PLA2G4A	Up
WFDC2	Up
CEMIP	Up
HOXC11	Up
MMP10	Up
DLL3	Up
DLX3	Up
UPK3A	Up
ABCA4	Up
NRK	Up
SCUBE3	Up
HOXC10	Up
SLC4A11	Up
CIT	Up
ST6GALNAC1	Up
MUC5B	Up
SLC7A10	Up
GNG4	Up
HOXB7	Up
PGGHG	Up
AKR1B15	Up
KCNK5	Up
COL9A2	Up
LY6K	Up
INHA	Up
SPRR1B	Up
KRT6A	Up
HOXB9	Up
KCNE4	Up
H2AW	Up
HKDC1	Up
MUC21	Up
UGT8	Up
GJB3	Up
GCLC	Up
ACHE	Up
FOXI3	Up
NCCRP1	Up
KRT81	Up
CD24	Up
FGB	Up
SP5	Up
SMIM31	Up
TNNT1	Up
ENO3	Up
EDN2	Up
PRSS2	Up
CEACAM7	Up
CNGA3	Up
SPTSSB	Up
ITGB4	Up
SMIM24	Up
HOXB13	Up
CDH17	Up
CRABP1	Up
PRSS3	Up
SERPINB5	Up
BRDT	Up
VSTM2L	Up
CRLF1	Up
NT5E	Up
ANGPTL4	Up
AGT	Up
VTCN1	Up
KLK6	Up
MS4A1	Up
CLDN9	Up
IVL	Up
MYBPH	Up
NMNAT2	Up
VSIG1	Up
CLDN6	Up
CCL19	Up
SMOC1	Up
MAGEA3	Up
HABP2	Up
SYT13	Up
CDA	Up
KIF1A	Up
BPIFA1	Up
PCSK1N	Up
ADGRF1	Up
TFPI2	Up
GFRA3	Up
BPIFB2	Up
CSAG1	Up
ERN2	Up
CCL20	Up
CPS1	Up
MMP7	Up
KRT17	Up
SAA1	Up
TM4SF4	Up
TFF2	Up
CALCA	Up
MSMB	Up
SERTM1	Down
ANGPT4	Down
RS1	Down
SH3GL3	Down
SLC6A4	Down
GPM6A	Down
CD300LG	Down
CD5L	Down
SGCG	Down
C10orf67	Down
ITLN2	Down
GYPE	Down
WNT3A	Down
OVCH1	Down
SPAAR	Down
CHRM1	Down
RTKN2	Down
SCUBE1	Down
FREM3	Down
MYOC	Down
MYZAP	Down
STX11	Down
PTPRQ	Down
RXFP1	Down
ST8SIA6	Down
GRIA1	Down
NECAB1	Down
JPH4	Down
FABP4	Down
ANGPTL7	Down
RSPO1	Down
C20orf202	Down
FAM107A	Down
LGI3	Down
CNTN6	Down
KCNA4	Down
CA4	Down
STXBP6	Down
OTC	Down
TAL1	Down
HBA1	Down
NCKAP5	Down
KANK3	Down
TEK	Down
CCM2L	Down
OTUD1	Down
CCDC141	Down
RAMP2	Down
LIMS2	Down
EDNRB	Down
CLEC3B	Down
GPD1	Down
ECSCR	Down
ODAM	Down
HSPA12B	Down
ACVRL1	Down
CCDC85A	Down
ASPA	Down
HTR3C	Down
RGCC	Down
S1PR1	Down
PECAM1	Down
LDB2	Down
FGF10	Down
JAM2	Down
NOVA2	Down
ARHGAP6	Down
ADRA1A	Down
PRX	Down
CTXND1	Down
RAMP3	Down
GPIHBP1	Down
AGER	Down
CLEC1A	Down
SEMA3G	Down
UPK3B	Down
ROBO4	Down
USHBP1	Down
ANKRD1	Down
FGFBP2	Down
ALKAL2	Down
EPAS1	Down
NMUR1	Down
LIN7A	Down
GRIK4	Down
FHL1	Down
SPOCK2	Down
TMEM100	Down
EMP2	Down
SIRPB1	Down
BTNL9	Down
ADAMTS8	Down
SLC19A3	Down
TCF21	Down
ACTN2	Down
CAV1	Down
ADCY8	Down
CD101	Down
ACADL	Down
FOXF1	Down
PTPN21	Down
OVCH2	Down
MASP1	Down
SH2D3C	Down
PALM2AKAP2	Down
GSTM5	Down
TNR	Down
GCOM1	Down
KCNT2	Down
FRMD3	Down
FCN3	Down
GRK5	Down
CLIC5	Down
MGAT3	Down
LYVE1	Down
DCC	Down
ADGRE3	Down
MCEMP1	Down
PLAC9	Down
CALCRL	Down
PRKG2	Down
CDH5	Down
ARHGEF15	Down
GPR146	Down
PDLIM2	Down
WWC2	Down
SOX7	Down
LRRN3	Down
ADRB2	Down
HIGD1B	Down
NXPH3	Down
FMO2	Down
MYCT1	Down
RBP2	Down
FEZ1	Down
FHL5	Down
CYYR1	Down
RASIP1	Down
ABCA8	Down
IQSEC3	Down
CAVIN2	Down
FGD5	Down
SOX17	Down
SEMA6A	Down
EMCN	Down
FAM110D	Down
LRRC2	Down
ARHGEF26	Down
GIMAP8	Down
TNNC1	Down
STARD13	Down
GDF10	Down
ALAS2	Down
CMTM2	Down
TUBB1	Down
LRRC36	Down
CD36	Down
EFCC1	Down
THSD1	Down
PTPRB	Down
C14orf132	Down
CDO1	Down
SCN4B	Down
GP9	Down
VEGFD	Down
ARC	Down
CLEC4M	Down
FAM189A2	Down
ACKR4	Down
FPR2	Down
AGRP	Down
TGM1	Down
TGFBR3	Down
CLEC14A	Down
NLRC4	Down
INMT	Down
SOSTDC1	Down
KIF17	Down
SIGLEC11	Down
TENT5B	Down
SLC39A8	Down
ERG	Down
SMAD6	Down
HBA2	Down
IGSF10	Down
TRHDE	Down
SBSPON	Down
STARD8	Down
PRKCE	Down
DNASE1L3	Down
ANGPTL1	Down
PHACTR1	Down
GPA33	Down
DPEP2	Down
VIPR1	Down
NPR1	Down
TAMALIN	Down
PTCRA	Down
LMO2	Down
PKNOX2	Down
GIMAP1	Down
SNX22	Down
COLEC10	Down
ADRB1	Down
F11	Down
CAT	Down
C13orf46	Down
COL6A6	Down
DACH1	Down
CLDN5	Down
SLC14A1	Down
KL	Down
MPIG6B	Down
MMRN2	Down
TMEM88	Down
RSPO2	Down
RHOJ	Down
TCEAL2	Down
CPB2	Down
LRRC32	Down
GLIPR2	Down
HSPB6	Down
ART4	Down
HHIP	Down
FOLR3	Down
ANOS1	Down
ADGRE1	Down
AOC3	Down
SEMA5A	Down
CYP1A2	Down
CASQ2	Down
CSRNP1	Down
GIMAP6	Down
SLIT2	Down
CXCR2	Down
ADAMTSL3	Down
PLCL1	Down
SYNC	Down
CLDN18	Down
PI16	Down
HBB	Down
GLDN	Down
MME	Down
SULT1C4	Down
RAI2	Down
DENND3	Down
RASGRP4	Down
ARHGAP31	Down
ADPRH	Down
GYPC	Down
THBD	Down
COX7A1	Down
CORO2B	Down
RADIL	Down
TIE1	Down
PNPLA6	Down
GHR	Down
SESN1	Down
PEAR1	Down
PALMD	Down
PRSS35	Down
PIP5K1B	Down
IL3RA	Down
CAVIN1	Down
CAMP	Down
ODF3L1	Down
CD93	Down
RAPGEF4	Down
ST6GALNAC3	Down
FAM162B	Down
COX4I2	Down
DES	Down
C1QTNF7	Down
ABI3BP	Down
AFF3	Down
ABCG2	Down
DNASE2B	Down
ADH1B	Down
DKK2	Down
PLA2G4F	Down
CGNL1	Down
FXYD6	Down
VEPH1	Down
TNXB	Down
SPRYD7	Down
HBEGF	Down
VSIR	Down
SASH1	Down
ZNF366	Down
TRPV2	Down
HSPB3	Down
LMCD1	Down
BDNF	Down
GPBAR1	Down
FAM124B	Down
CPED1	Down
FGF2	Down
CAV2	Down
SPN	Down
CCL23	Down
SELP	Down
SLIT3	Down
NIM1K	Down
ZNF423	Down
KCNAB1	Down
HEG1	Down
TBX3	Down
KANK2	Down
INKA2	Down
MFAP3L	Down
SLC5A9	Down
ST6GALNAC5	Down
TMEM204	Down
LGI4	Down
BCHE	Down
GPX3	Down
GPM6B	Down
LAMP3	Down
PEAK1	Down
TNS1	Down
MAMDC2	Down
CXCR1	Down
FGR	Down
RXRG	Down
LHFPL6	Down
PKHD1L1	Down
SYNM	Down
ANGPT1	Down
TSPAN18	Down
ANXA8L1	Down
LTBP4	Down
GUCY1A2	Down
GFOD1	Down
SPTBN1	Down
FLI1	Down
ESAM	Down
ADARB1	Down
PPP1R15A	Down
CD52	Down
INPP5K	Down
WFS1	Down
P2RY1	Down
JCAD	Down
NOTCH4	Down
CRYAB	Down
HPSE2	Down
PDZD2	Down
RETN	Down
DAPK2	Down
ADCY4	Down
TACC1	Down
SYNE3	Down
FFAR4	Down
LILRA5	Down
RILPL2	Down
ATP1A2	Down
PRAM1	Down
MS4A7	Down
F8	Down
CD300C	Down
BMPER	Down
DUOX1	Down
SCN7A	Down
ADTRP	Down
ELAPOR2	Down
RCAN1	Down
SLC27A6	Down
SNRK	Down
METTL7A	Down
RAB40A	Down
STX12	Down
PTH1R	Down
KLF6	Down
CBX7	Down
FGFR4	Down
BCL6B	Down
C1QTNF2	Down
SEPTIN4	Down
TRIM58	Down
SFTPC	Down
C8B	Down
MFNG	Down
SEMA6D	Down
AFAP1L1	Down
NDST1	Down
CNTFR	Down
NKAPL	Down
IL1RL1	Down
FAM189A1	Down
ITGA8	Down
WASF3	Down
DOCK4	Down
ITIH5	Down
MSRB3	Down
KCNA5	Down
AVPR2	Down
IL17D	Down
PREX2	Down
GIMAP7	Down
VWF	Down
OSCAR	Down
HPS5	Down
SLCO1A2	Down
CNRIP1	Down
KRT79	Down
ITM2A	Down
SFRP5	Down
CASKIN2	Down
MYL9	Down
MSR1	Down
AGTPBP1	Down
MFAP4	Down
FAM13C	Down
PLPP3	Down
ECRG4	Down
QKI	Down
SH3GL2	Down
OLR1	Down
PCDHGB7	Down
PDE5A	Down
HMGCLL1	Down
S100A3	Down
KRT4	Down
RECK	Down
CCBE1	Down
C1orf162	Down
RNF144B	Down
CASS4	Down
S1PR4	Down
ADAMTS1	Down
TBX4	Down
TGFBR2	Down
LEPR	Down
FILIP1	Down
LGALSL	Down
SYNPO2	Down
LRP2BP	Down
CD34	Down
CFD	Down
PPP1R14A	Down
EDN3	Down
SEC14L3	Down
MARCO	Down
CCN5	Down
KIF1C	Down
WNT7A	Down
DENND2A	Down
GAS6	Down
GPER1	Down
NHSL1	Down
LDLR	Down
EML1	Down
DLC1	Down
AMOTL1	Down
MEFV	Down
RANBP3L	Down
ABHD6	Down
SSTR1	Down
MYADM	Down
PHACTR2	Down
LILRA1	Down
AGTR1	Down
SPARCL1	Down
MMRN1	Down
PCOLCE2	Down
SNCA	Down
ZBED2	Down
ENG	Down
AGTR2	Down
PPM1F	Down
WIF1	Down
SYNPO	Down
KCNK3	Down
CRTAC1	Down
REM1	Down
SERINC1	Down
RNF182	Down
TMEM273	Down
LHFPL3	Down
SLC1A1	Down
TBX2	Down
ANKRD29	Down
C5AR1	Down
WFDC1	Down
HYAL2	Down
SVEP1	Down
IL33	Down
FERMT2	Down
SYNDIG1L	Down
ADGRL2	Down
TMEM47	Down
RASGEF1B	Down
GKN2	Down
TLR4	Down
KLF4	Down
ROR1	Down
ACP5	Down
ITPRIP	Down
PCDH12	Down
SOX5	Down
VSIG4	Down
MTMR10	Down
PDE2A	Down
GPR17	Down
HSPB8	Down
SYN2	Down
CDH13	Down
TMOD1	Down
ACE	Down
FIBIN	Down
BMPR2	Down
MDGA1	Down
TINCR	Down
STARD9	Down
HSD17B6	Down
PDK4	Down
HACD4	Down
GMFG	Down
GNAQ	Down
ACSS3	Down
FRY	Down
RSPO4	Down
ADRA1D	Down
DOK2	Down
CCDC69	Down
RASGRF1	Down
PGM5	Down
FZD4	Down
ICAM2	Down
JDP2	Down
FRMD4A	Down
KLF9	Down
SGCA	Down
CAB39L	Down
IQCN	Down
RBMS3	Down
FBLN5	Down
PEBP4	Down
GSTA3	Down
TOM1L2	Down
TPRG1	Down
KIAA0040	Down
SCN2B	Down
AQP4	Down
PDE1B	Down
VAMP2	Down
GATA6	Down
PID1	Down
ABCA9	Down
DIPK2B	Down
ITLN1	Down
PCDH9	Down
PRICKLE2	Down
ACOXL	Down
FABP5	Down
NDRG4	Down
CSF3	Down
OLFML1	Down
TMEM139	Down
HLA-E	Down
CALCOCO1	Down
SEC14L6	Down
ANXA3	Down
GAB1	Down
TMEM150B	Down
JAML	Down
SCN1A	Down
ADAMTSL4	Down
NXF3	Down
NOS1	Down
CTNNAL1	Down
RRAS	Down
TIMP3	Down
ERBB4	Down
SRPX	Down
CFL2	Down
KLF2	Down
ARHGAP24	Down
OGN	Down
GIMAP4	Down
STAC	Down
TPPP3	Down
MRC1	Down
CYBRD1	Down
GIPC2	Down
TNFSF12	Down
ANKRD33B	Down
ID4	Down
DPYSL2	Down
SLC11A1	Down
GPC3	Down
RBMS2	Down
DIXDC1	Down
SHC3	Down
NRG1	Down
PCDH17	Down
GATA2	Down
SCARA5	Down
C20orf194	Down
AHNAK	Down
SH2D1B	Down
NTNG1	Down
LMOD1	Down
KLF13	Down
PRKG1	Down
CHRDL1	Down
PLA2G1B	Down
RASL12	Down
ITPRID2	Down
CLEC12A	Down
A2M	Down
CSRP1	Down
CCRL2	Down
RBP4	Down
ZEB2	Down
NEGR1	Down
DUOXA1	Down
MS4A15	Down
NKD1	Down
CD300LF	Down
PRKCH	Down
MTARC2	Down
AARD	Down
SLC46A2	Down
SECISBP2L	Down
CACNA2D2	Down
ALOX5	Down
MVB12B	Down
MT1M	Down
PRKCQ	Down
FAM167B	Down
LPL	Down
ARHGEF6	Down
SORBS1	Down
JUND	Down
HYAL1	Down
BMX	Down
KCNJ5	Down
REEP1	Down
NRN1	Down
ZEB1	Down
ALOX5AP	Down
GNG11	Down
IL7R	Down
LATS2	Down
UBASH3B	Down
GPR4	Down
PTGER4	Down
RTN1	Down
CTIF	Down
ARHGAP44	Down
ZNF106	Down
CYRIA	Down
MYOCD	Down
IHH	Down
IL5RA	Down
TLR8	Down
NCF2	Down
F10	Down
PHOSPHO1	Down
SOCS2	Down
UBL3	Down
FAM241A	Down
NEBL	Down
MS4A2	Down
CA3	Down
SOBP	Down
PLSCR4	Down
ARRB1	Down
LRRC18	Down
NEXN	Down
CYP4B1	Down
CYP27A1	Down
SCIMP	Down
KHDRBS2	Down
ATP1B2	Down
EXOC3L1	Down
RADX	Down
C1orf198	Down
FGFR2	Down
TOX2	Down
PPBP	Down
LIMCH1	Down
NTN4	Down
SLC7A7	Down
SHROOM4	Down
ZFYVE9	Down
ZBTB16	Down
SIDT2	Down
SERPING1	Down
PROS1	Down
PRICKLE1	Down
HOXA5	Down
MAPK4	Down
PDLIM1	Down
P2RY14	Down
SMTNL2	Down
ST6GALNAC2	Down
TM6SF1	Down
SELPLG	Down
SLC27A3	Down
PILRA	Down
TNS2	Down
GGTA1	Down
ARAP3	Down
SLC25A25	Down
RNF122	Down
SMAD9	Down
TMEM220	Down
INKA1	Down
P3H2	Down
ARL13B	Down
TLL1	Down
GJA4	Down
PF4	Down
DCSTAMP	Down
PTPRM	Down
ACKR1	Down
EPB41L2	Down
ACACB	Down
NOSTRIN	Down
GJA5	Down
ARHGAP18	Down
FRMD4B	Down
FCGR3B	Down
CCDC50	Down
FAM167A	Down
SLC16A11	Down
MYO7B	Down
PTGIR	Down
TSPAN7	Down
SCAI	Down
CYGB	Down
MYOZ1	Down
PPP4R4	Down
ABCG1	Down
EFEMP1	Down
CD33	Down
MOCS1	Down
EIF4E3	Down
PCYOX1	Down
NEDD9	Down
LRRK2	Down
RIPOR1	Down
CLIC3	Down
N4BP2L1	Down
TBX5	Down
PCYT1B	Down
LEFTY2	Down
CFAP161	Down
PAPSS2	Down
PLEKHO2	Down
NPR3	Down
LSAMP	Down
GALNT18	Down
PPARGC1B	Down
CRIM1	Down
SOX18	Down
NPNT	Down
UTRN	Down
LMO7	Down
S100A12	Down
SORBS3	Down
ROBO2	Down
GJC2	Down
MMP19	Down
PLLP	Down
KAT2B	Down
FOSB	Down
NDRG2	Down
COLEC12	Down
HK3	Down
CLEC4E	Down
SHANK3	Down
AKAP7	Down
SPI1	Down
MRAS	Down
CD83	Down
CEACAM21	Down
LIFR	Down
HPCAL1	Down
PRG4	Down
APBB1	Down
BTK	Down
COL6A5	Down
STOM	Down
PCDHGC3	Down
APOBR	Down
CA2	Down
SLC44A2	Down
MITF	Down
LILRB3	Down
RFLNB	Down
SH3BP5	Down
FBP1	Down
SELENOP	Down
SUSD2	Down
PLA2G5	Down
APOLD1	Down
ADGRL4	Down
C1orf115	Down
CD302	Down
BST1	Down
TTC28	Down
PLCE1	Down
NHSL2	Down
LRRC8C	Down
ADGRE5	Down
HSD17B4	Down
CST5	Down
MYH10	Down
DOCK11	Down
PDGFB	Down
C11orf96	Down
NTRK2	Down
CRY2	Down
SEPTIN10	Down
RFX2	Down
FPR1	Down
PKIG	Down
FLVCR2	Down
SH3BGRL	Down
PMP22	Down
MAP3K3	Down
ZNF385B	Down
PAQR5	Down
MFSD2A	Down
SLC12A4	Down
SLC15A2	Down
SFTPD	Down
EGR2	Down
ZBTB4	Down
PHLDB2	Down
CCND2	Down
RHEX	Down
ABCA3	Down
PTPN1	Down
STON1	Down
FLRT3	Down
EDN1	Down
KLB	Down
MYRF	Down
MYH11	Down
SLC15A3	Down
NR4A3	Down
GADD45B	Down
FCN1	Down
NES	Down
ADAMTS15	Down
GPRIN2	Down
HSPB7	Down
ZBTB47	Down
TTLL7	Down
TUBB6	Down
LAMC3	Down
MAOB	Down
KCTD12	Down
SAMHD1	Down
FLT4	Down
BMP2	Down
SCD5	Down
SLC51B	Down
MSMO1	Down
MINDY2	Down
KCNJ8	Down
NEK7	Down
ABCA6	Down
TYROBP	Down
VIM	Down
WFDC12	Down
RILP	Down
NATD1	Down
C1orf87	Down
ALDH2	Down
ANKS1A	Down
PTGDS	Down
ABLIM3	Down
MTURN	Down
SCGB1A1	Down
CTDSPL	Down
SLCO2A1	Down
C1QA	Down
MAFF	Down
INSYN1	Down
SMAD7	Down
SPRING1	Down
IL20RA	Down
CYS1	Down
KIF26A	Down
PPARG	Down
MEIS1	Down
NFIX	Down
PTGFR	Down
MS4A14	Down
TNFSF13	Down
TPPP	Down
APOL3	Down
PCSK9	Down
LPXN	Down
FGD3	Down
ABCB1	Down
KMO	Down
CATSPERD	Down
TRIM71	Down
S1PR5	Down
HRCT1	Down
PDE1C	Down
KAZN	Down
SNX25	Down
ZFP36	Down
PACRG	Down
DNAJB4	Down
RETREG1	Down
CLDN11	Down
GALNT13	Down
TCEAL7	Down
SERTAD1	Down
TNS3	Down
ASGR1	Down
TCF4	Down
AATK	Down
ZMYND15	Down
PPFIBP1	Down
HOATZ	Down
APH1B	Down
GIPC3	Down
FRAS1	Down
NUPR1	Down
OSBPL6	Down
GPC5	Down
CCDC173	Down
ATOH8	Down
VGLL3	Down
ARAP2	Down
SFTPA1	Down
RGS22	Down
IL34	Down
ARHGEF37	Down
SULT1A1	Down
RAB11FIP1	Down
LILRA6	Down
PREX1	Down
PIK3R1	Down
SIGLEC6	Down
LY86	Down
GFRA1	Down
TSPAN12	Down
IRX1	Down
LPCAT3	Down
MATN3	Down
DCN	Down
B3GALNT1	Down
LTC4S	Down
CCN2	Down
PALD1	Down
LST1	Down
IL6	Down
AADAC	Down
GABARAPL1	Down
DUSP1	Down
ARHGAP29	Down
CCDC102B	Down
RASSF2	Down
MAP3K8	Down
DAB2IP	Down
PLA2G3	Down
CCDC81	Down
C1QB	Down
SEMA3B	Down
FAM181A	Down
SLCO2B1	Down
C11orf97	Down
CPAMD8	Down
NFASC	Down
SIRPA	Down
MNDA	Down
CD244	Down
ETS1	Down
AQP9	Down
EVI2B	Down
INSIG1	Down
HECW2	Down
RAB8B	Down
RASSF8	Down
MCC	Down
LRRC4B	Down
NDNF	Down
PIK3R5	Down
NCKAP1L	Down
TPSAB1	Down
SFTPA2	Down
MYO1B	Down
MAP6	Down
STAC3	Down
PIK3IP1	Down
GATA5	Down
TNNI2	Down
SIK2	Down
NXPE3	Down
CCL24	Down
F2RL3	Down
WWTR1	Down
GNGT2	Down
RDX	Down
ANO6	Down
RIMS4	Down
FAT4	Down
AQP1	Down
AK1	Down
KANK4	Down
LIMD1	Down
P2RX1	Down
FAR2	Down
DDO	Down
PDPN	Down
RORA	Down
KLRF1	Down
COLGALT2	Down
CORO1C	Down
ZCCHC24	Down
ARRDC4	Down
IL18R1	Down
KLF10	Down
JAM3	Down
THEMIS2	Down
MID1IP1	Down
DIAPH2	Down
CXCL16	Down
PKDCC	Down
LNX2	Down
CADM1	Down
CNR1	Down
CNN1	Down
SEC14L1	Down
PARD6B	Down
EMP1	Down
SELE	Down
MYLK	Down
ANKRD66	Down
LRCH2	Down
TBC1D4	Down
EMILIN2	Down
TNFAIP8L3	Down
PXDC1	Down
HCK	Down
ZNF331	Down
PARD3B	Down
ECM2	Down
VSTM4	Down
GPR65	Down
PLAGL1	Down
APBB2	Down
OTULINL	Down
PODXL	Down
IFNGR1	Down
PRELP	Down
MAGI1	Down
CELF2	Down
ARHGAP30	Down
WNT9A	Down
LAMB2	Down
ADCY9	Down
C7	Down
VASH1	Down
EHD2	Down
THRA	Down
REPS2	Down
ARHGAP25	Down
ALPP	Down
COL13A1	Down
[truncated: 592 more rows]
