# Supplementary material for: Identification and integration analysis of a novel prognostic signature associated with cuproptosis-related ferroptosis genes and relevant lncRNA regulatory axis in lung adenocarcinoma
Source: Aging (Albany NY). 2023 Mar 3;15(5):1543–63. doi: 10.18632/aging.204561 (PMC10042693; doi:10.18632/aging.204561)
Supplement: Supplementary Table 3 [file aging-15-204561-s004.xlsx]

## Sheet: miRWalk
mirnaid	refseqid	genesymbol	duplex	start	end	bindingp	energy	seed	accessibility	au	phylopstem	phylopflank	me	number_of_pairings	binding_region_length	longest_consecutive_pairings	position	validated	TargetScan	miRDB
hsa-miR-31-5p	NM_001372066	TFAP2A	AGGCAAGATGCTGGCATAGCT#AGTTGTGCTGGCAGTAGTTTCCATGCCTG#(((((.(((((((((((((((#)))))))))))))......))..))))).	2692	2721	1	-23	0	0.00286047	0.559	0	0	-5.83853	20	29	13	3UTR		0	0
hsa-miR-99a-3p	NM_001372066	TFAP2A	CAAGCTCGCTTCTATGGGTCTG#CAGGCCGTGAAGCCAGCA#...(((.(((((....((((((#))))))..))))).))).	1679	1697	1	-20.4	0	0.000654307	0.485	0	0	-11.1727	14	18	6	3UTR		0	0
hsa-miR-29b-2-5p	NM_001372066	TFAP2A	CTGGTTTCACATGGTGGCTTAG#CTGTGCCCTCATGTGGAGCCT#..((((((((((((.(((.(((#))).))).)))))))))))).	1646	1667	1	-24.9	1	0.00039874	0.368	0	0	-5.69245	18	21	12	3UTR		0	0
hsa-miR-197-5p	NM_001372066	TFAP2A	CGGGTAGAGAGGGCAGTGGGAGG#TCTCCGGGACTGCCCTCTCGACTGT#(((...(((((((((((.(((((#)))))...)))))))))))..))).	1561	1586	1	-30.9	0	0.00179823	0.309	0	0	-12.9896	19	25	11	3UTR		0	0
hsa-miR-181a-2-3p	NM_001372066	TFAP2A	ACCACTGACCGTTGACTGTACC#GGACTGCCCTCTCGACTGTCAGTGGG#.((((((((.(((((.......#.))))).)))))))).	1567	1593	1	-20.9	1	0.000146723	0.294	0	0	-5.26888	13	16	8	3UTR		0	1
hsa-miR-187-5p	NM_001372066	TFAP2A	GGCTACAACACAGGACCCGGGC#TCTGGGATTCATGAATTTAGCCCTGTTGTAGCA#.((((((((((((((((((((.#)))))).))).))..........))))))))).	2271	2304	1	-21.4	1	0.00846872	0.618	0	0	-3.79332	20	33	9	3UTR	MIRT574408	0	1
hsa-miR-217-5p	NM_001372066	TFAP2A	TACTGCATCAGGAACTGATTGGA#TCCCTATTAGTTCTTCATGTGGTT#.(((((((.((((((((((.(((#)))..)))))))))).))))))).	2204	2228	1	-20.4	1	0.00369736	0.632	0	0	-4.84971	20	24	10	3UTR		0	0
hsa-miR-218-2-3p	NM_001372066	TFAP2A	CATGGTTCTGTCAAGCACCGCG#GTTGTGCTGGCAGTAGTTTCCATGC#(((((..(((((.(((((.((.#)).))))))))))......))))).	2693	2718	1	-20.7	0	0.000727555	0.574	0	0	-8.67135	17	25	10	3UTR		0	0
hsa-miR-200b-5p	NM_001372066	TFAP2A	CATCTTACTGGGCAGCATTGGA#TCCTTTGTTGCCCAGATAAA#....(((((((((((((..(((#)))..)))))))))).))).	2735	2755	1	-23.6	0	0.0126769	0.662	0	0	-9.54656	16	20	10	3UTR		0	0
hsa-miR-127-5p	NM_001372066	TFAP2A	CTGAAGCTCAGAGGGCTCTGAT#ATCATAGTCCTTTGTTGCCCAGA#(((..((.(((((((((.((((#)))).)))))))))..)).))).	2728	2751	1	-19.6	0	0.0197518	0.632	0	0	-13.4023	18	23	9	3UTR		0	0
hsa-miR-134-5p	NM_001372066	TFAP2A	TGTGACTGGTTGACCAGAGGGG#TTTCTCTGGCAACACGATTCGCAGTTATAT#((((((((((((.(((((((((#)))))))))))))........)))))))).	2032	2062	1	-21.2	1	0.0074188	0.603	0	0	-5.22671	21	30	13	3UTR		0	0
hsa-miR-150-5p	NM_001372066	TFAP2A	TCTCCCAACCCTTGTACCAGTG#TATTGTCTTTAAACCAAGGGTTAGGGAA#..((((((((((((........#.)))))))).)))).	2543	2571	1	-19.5	1	0.000168099	0.618	0	0	-5.9255	12	15	8	3UTR		0	0
hsa-miR-185-5p	NM_001372066	TFAP2A	TGGAGAGAAAGGCAGTTCCTGA#GGGAATTTTCCTCTCTCTCTC#.(((((((.(((.(((((((..#)))))))..))).))))))).	2566	2587	1	-20.8	1	0.0685301	0.588	0	0	-6.13885	17	21	7	3UTR		0	0
hsa-miR-200c-3p	NM_001372066	TFAP2A	TAATACTGCCGGGTAATGATGGA#CTGTCTTTACCCAGGCGTATTTTTGTTCTTGGCAGTATTT#.(((((((((((((((.(((((.#))))).))))))..................))))))))).	2799	2839	1	-23.7	1	0.01487	0.662	0	0	-3.79332	20	40	9	3UTR		1	1
hsa-miR-101-2-5p	NM_001372066	TFAP2A	TCGGTTATCATGGTACCGATGC#CATGTGGTTCATGGTACTGAT#((((.((((((((.(((((((.#))).)))))))))))))))).	2219	2240	1	-16.8	0	0.00247756	0.632	0	0	-8.91345	19	21	16	3UTR		0	0
hsa-miR-361-5p	NM_001372066	TFAP2A	TTATCAGAATCTCCAGGGGTAC#CCCTGGAAAGATTTTGAA#...(((((((((((((((....#)))))))..)))))))).	2421	2439	1	-21.5	0	0.0711448	0.662	0	0	-6.51454	15	18	8	3UTR		0	0
hsa-miR-373-5p	NM_001372066	TFAP2A	ACTCAAAATGGGGGCGCTTTCC#GACCTCCCCACCCGCTCCCACACCCCTGTGCCCTCATGTGGAGC#.(((...((((((((((.....#.))))))))))...))).	1621	1665	1	-22.5	0	4.98809e-05	0.368	0	0	-11.357	13	18	10	3UTR		0	0
hsa-miR-381-5p	NM_001372066	TFAP2A	AGCGAGGTTGCCCTTTGTATAT#GGGGCAGCCTCT#...(((((((((((........#))))))))))).	1590	1602	1	-22	0	5.50333e-10	0.309	0	0	-7.48304	11	12	11	3UTR		0	0
hsa-miR-331-5p	NM_001372066	TFAP2A	CTAGGTATGGTCCCAGGGATCC#TTTGGGACCACCTGGT#((((((..(((((((((.....#))))))))))))))).	2624	2640	1	-21.9	0	0.00118893	0.618	0	0	-7.7949	15	16	15	3UTR		0	0
hsa-miR-324-5p	NM_001372066	TFAP2A	CGCATCCCCTAGGGCATTGGTG#CCAGTGTTTGGGGGATT#...((((((((.((((((((..#)))))))))))))))).	2248	2265	1	-22.4	0	0.000119826	0.618	0	0	-9.86134	16	17	16	3UTR		0	0
hsa-miR-202-3p	NM_001372066	TFAP2A	AGAGGTATAGGGCATGGGAA#TCCCACACCCCTGTGCCCTCA#.(((((((((((..(((((.#)))))...))))))))).)).	1636	1657	1	-24.1	1	0.0111937	0.353	0	0	-5.9393	16	21	9	3UTR		0	0
hsa-miR-432-5p	NM_001372066	TFAP2A	TCTTGGAGTAGGTCATTGGGTGG#CCGGCGGGTGACAGCTCCGGGAT#(((((((((..((((((.(.(((#))).).)))))).))))))))).	1460	1483	1	-26.9	1	1.51727e-06	0.294	0	0	-8.00486	19	23	9	3UTR		0	0
hsa-miR-181d-3p	NM_001372066	TFAP2A	CCACCGGGGGATGAATGTCAC#GTGATATTGGACCCTGGA#...((((((..(.((((((((#)))))))).).)))))).	2410	2428	1	-20.3	0	0.0398518	0.662	0	0	-11.871	15	18	8	3UTR		0	0
hsa-miR-526b-5p	NM_001372066	TFAP2A	CTCTTGAGGGAAGCACTTTCTGT#GCAGCTGAACCCATTGTTTCCCTCAAGT#..(((((((((((((........#.))))))))))))).	2902	2930	1	-21.5	1	0.0427447	0.632	0	0	-5.19005	13	15	13	3UTR		0	0
hsa-miR-500a-3p	NM_001372066	TFAP2A	ATGCACCTGGGCAAGGATTCTG#CATAGTCCTTTGTTGCCCAGA#......(((((((((((((.((#)).))))))....))))))).	2730	2751	1	-19.1	0	0.0197518	0.632	0	0	-15.5666	15	21	7	3UTR		0	0
hsa-miR-503-5p	NM_001372066	TFAP2A	TAGCAGCGGGAACAGTTCTGCAG#GCGGGTGACAGCTCCGGGATCAGCAACCCTTCCTGCTGCTGC#((((((((((((..((((((...#.))).)))..)))))))))))).	1463	1505	1	-24.8	1	0.000704564	0.309	0	0	-6.08354	18	23	12	3UTR	MIRT466431	0	0
hsa-miR-597-3p	NM_001372066	TFAP2A	TGGTTCTCTTGTGGCTCAAGCGT#CGCTCCCACACCCCTGTGCCCTCATGTGGAGCCTAAGAGAACA#..(((((((((.(((((..((((#.)))).)))))))))))))).	1633	1676	1	-24	1	0.0120995	0.426	0	0	-8.3038	18	21	14	3UTR		0	0
hsa-miR-600	NM_001372066	TFAP2A	ACTTACAGACAAGAGCCTTGCTC#GAGCAGGGTATCATTTAGATATTCCACTGTGTCTGTAT#...((((((((...(((((((((#)))))))))....................)))))))).	2962	3000	1	-22.1	0	2.44017e-06	0.632	0	0	-12.0073	17	38	9	3UTR		0	0
hsa-miR-616-3p	NM_001372066	TFAP2A	AGTCATTGGAGGGTTTGAGCAG#GTTTAACTCTCCCTTGGCA#.((((..((((((.((((((..#))))))))))))..)))).	2866	2885	1	-20.3	0	0.064085	0.574	0	0	-8.09481	16	19	12	3UTR		0	1
hsa-miR-621	NM_001372066	TFAP2A	GGCTAGCAACAGCGCTTACCT#GGTGAGTCTGTTTTAAGCCT#((((...(((((.(((((((.#))))))))))))...)))).	2129	2149	1	-21.1	0	0.0214161	0.75	0	0	-12.7904	16	20	12	3UTR		0	0
hsa-miR-625-5p	NM_001372066	TFAP2A	AGGGGGAAAGTTCTATAGTCC#GGGTTAGGGAATTTTCCTCTC#.(((((((((((((.((((((#)))))).))))))))))))).	2560	2581	1	-20.2	1	0.000174378	0.603	0	0	-4.52877	19	21	13	3UTR		0	0
hsa-miR-629-5p	NM_001372066	TFAP2A	TGGGTTTACGTTGGGAGAACT#AGTTCTGCCAAGTTTGTGAACCCT#.(((((((((((((.((((((#)))))).))))...))))))))).	1703	1727	1	-25.4	1	0.070775	0.662	0	0	-4.52877	19	24	9	3UTR		0	0
hsa-miR-645	NM_001372066	TFAP2A	TCTAGGCTGGTACTGCTGA#CAGTAGTTTCCATGCCTGT#..((((((((.(((((((.#)))))))..))).))))).	2703	2722	1	-20.6	1	0.00393251	0.574	0	0	-7.78178	15	19	7	3UTR		0	0
hsa-miR-549a-5p	NM_001372066	TFAP2A	AGCTCATCCATAGTTGTCACTG#GGTGACAGCTCCGGGATCAGCA#.(((.((((..((((((((((.#))))))))))...)))).))).	1466	1488	1	-23.5	0	7.1514e-05	0.309	0	0	-11.9796	17	22	10	3UTR		0	0
hsa-miR-671-3p	NM_001372066	TFAP2A	TCCGGTTCTCAGGGCTCCACC#GTGGAGCCTAAGAGAACAGAA#((..((((((.(((((((((.#)))))))))..)))))).)).	1658	1679	1	-26.2	0	0.0466732	0.456	0	0	-11.3519	17	21	9	3UTR		0	0
hsa-miR-668-5p	NM_001372066	TFAP2A	TGCGCCTCGGGTGAGCATG#TGTCTTTACCCAGGCGTAT#(((((((.(((((((((..#)))..))))))))))))).	2800	2819	1	-21	1	0.00130374	0.676	0	0	-6.25121	16	19	13	3UTR		0	0
hsa-miR-670-5p	NM_001372066	TFAP2A	GTCCCTGAGTGTATGTGGTG#ATTATATGCGCTTCATGGGACT#(((((((((((((((((((.#)))))))))))).)).))))).	1819	1841	1	-23.4	1	0.0111725	0.632	0	0	-3.93757	19	22	12	3UTR		0	0
hsa-miR-1298-3p	NM_001372066	TFAP2A	CATCTGGGCAACTGACTGAAC#GTTTCCATGCCTGTCAATGTATCATAGTCCTTTGTTGCCCAGATA#.(((((((((((.(((((...#.)))))....))))))))))).	2708	2753	1	-22.8	1	0.0162088	0.662	0	0	-5.08246	16	22	11	3UTR		0	1
hsa-miR-765	NM_001372066	TFAP2A	TGGAGGAGAAGGAAGGTGATG#GTCACCACCTTCCCTTA#..((((.(((((..((((((.#)))))).))))))))).	1843	1860	1	-20.5	0	0.299606	0.559	0	0	-8.64666	15	17	9	3UTR		0	0
hsa-miR-509-3-5p	NM_001372066	TFAP2A	TACTGCAGACGTGGCAATCATG#CATGTCATGTCTTCAGTT#.((((.((((((((((......#.)))))))))).)))).	1972	1990	1	-19.1	0	0.0118243	0.632	0	0	-5.69428	14	17	10	3UTR		0	0
hsa-miR-936	NM_001372066	TFAP2A	ACAGTAGAGGGAGGAATCGCAG#CCTTCCTGCTGCTGC#.(((((((((((((........#))))))).)))))).	1490	1505	1	-20.1	1	0.000704564	0.309	0	0	-4.76182	13	15	7	3UTR		0	0
hsa-miR-1231	NM_001372066	TFAP2A	GTGTCTGGGCGGACAGCTGC#GTGGCTGTCTTTACCCAGGCGT#.((((((((.((((((((((#))))))))))...)))))))).	2795	2817	1	-27.8	1	0.000955899	0.662	0	0	-5.03583	18	22	10	3UTR		0	0
hsa-miR-1236-5p	NM_001372066	TFAP2A	TGAGTGACAGGGGAAATGGGGA#TCCCCACCCGCTCCCACACCCCTGTGCCCTCAT#((((.((((((((...(((((.#.)))))..))))))).).)))).	1625	1658	1	-24.3	0	0.0369046	0.368	0	0	-9.88195	17	23	7	3UTR		0	0
hsa-miR-1285-3p	NM_001372066	TFAP2A	TCTGGGCAACAAAGTGAGACCT#GTTTCCATGCCTGTCAATGTATCATAGTCCTTTGTTGCCCAGAT#((((((((((((((.((.....#.)))))))))))))))).	2708	2752	1	-26	1	0.0173758	0.647	0	0	-4.67302	16	18	16	3UTR		0	1
hsa-miR-1290	NM_001372066	TFAP2A	TGGATTTTTGGATCAGGGA#TCCCTATTAGTTCTTCATGTGGTTCATGGTACTGATTTAGAAATCCAG#((((((((((((((((...#.)))))))))))))))).	2204	2252	1	-20.9	1	0.00698938	0.603	0	0	-3.93757	16	18	16	3UTR		0	0
hsa-miR-1293	NM_001372066	TFAP2A	TGGGTGGTCTGGAGATTTGTGC#GCCCTTGGGTCCCCCCGAGTCTCCGGGACTGCCCT#.((((((((((((((((((...#.))))))))))).))))))).	1542	1577	1	-28.2	1	0.000157427	0.294	0	0	-3.79332	18	21	11	3UTR		0	0
hsa-miR-1299	NM_001372066	TFAP2A	TTCTGGAATTCTGTGTGAGGGA#TCCCTTACATACTTCAGTTCAGAT#.((((((....(((((((((((#)))))))))))......)))))).	1853	1877	1	-20.9	1	0.0541203	0.662	0	0	-11.2306	17	24	11	3UTR		0	0
hsa-miR-1263	NM_001372066	TFAP2A	ATGGTACCCTGGCATACTGAGT#CTCAAGTATAATAAAAACTTACTTTCAACTTGGAGTTCAGAGCAGGGTATCATT#((((((((((.((...(((((.#.))))).)))))))))))).	2923	2977	1	-20.5	1	0.0113156	0.618	0	0	-8.58769	17	20	12	3UTR		0	0
hsa-miR-1910-3p	NM_001372066	TFAP2A	GAGGCAGAAGCAGGATGACA#TCAGCAACCCTTCCTGCTGCTGCTA#..(((((.(((((((.....#.))))))).))))).	1482	1507	1	-20.6	0	0.000960708	0.309	0	0	-7.50368	12	15	7	3UTR		0	0
hsa-miR-2110	NM_001372066	TFAP2A	TTGGGGAAACGGCCGCTGAGTG#TATTCAGTGGCTGTCTTTACCCAGG#((((((((((((((((((((((#)))))))))))))).))).))))).	2789	2814	1	-27.9	1	0.00181245	0.662	0	0	-3.93757	22	25	14	3UTR		0	0
hsa-miR-3124-3p	NM_001372066	TFAP2A	ACTTTCCTCACTCCCGTGAAGT#GCTTCATGGGACTGAGT#......((((.(((((((((((#))))))))))).)))).	1828	1845	1	-22.9	0	0.00247619	0.632	0	0	-18.3913	15	17	11	3UTR		0	0
hsa-miR-3145-5p	NM_001372066	TFAP2A	AACTCCAAACACTCAAAACTCA#TGGGTTTTGAATCTTCCCTATTAGTTCTTCATGTGGTTCATGGTACTGATTTAGAAATCCAGTGTTTGGGGG#..(((((((((((.........#.))))))))))).	2190	2262	1	-17	1	0.000494522	0.632	0	0	-6.78234	11	13	11	3UTR		0	0
hsa-miR-3151-5p	NM_001372066	TFAP2A	GGTGGGGCAATGGGATCAGGT#AGCTGAACCCATTGTTTCCCT#((.(((((((((((.((((.(#).)))).))))))))))))).	2904	2925	1	-24	0	0.0707975	0.647	0	0	-6.23056	18	21	13	3UTR		0	0
hsa-miR-3151-3p	NM_001372066	TFAP2A	CCTGATCCCACAGCCCACCT#GGGTGACAGCTCCGGGATCAGC#.((((((((..(((.(((((#)))))...)))..)))))))).	1465	1487	1	-23.3	1	7.14888e-05	0.309	0	0	-8.59606	16	22	8	3UTR		0	0
hsa-miR-3154	NM_001372066	TFAP2A	CAGAAGGGGAGTTGGGAGCAGA#TCTCTCTCCTCTCTCTTTCTGT#(((((((((((..(((((.(((#))))))))..))))))))))).	2585	2607	1	-25.3	1	0.0885193	0.574	0	0	-8.57351	19	22	11	3UTR		0	1
hsa-miR-548w	NM_001372066	TFAP2A	AAAAGTAACTGCGGTTTTTGCCT#GGCAACACGATTCGCAGTTATA#....((((((((((.(((((((.#)))))...)).)))))))))).	2039	2061	1	-20.5	0	0.00759289	0.588	0	0	-10.282	17	22	10	3UTR		0	1
hsa-miR-3192-5p	NM_001372066	TFAP2A	TCTGGGAGGTTGTAGCAGTGGAA#TTCCACTGTCCTCCCT#...((((((.....(((((((((#))))))))))))))).	2499	2515	1	-24.1	0	0.263317	0.721	0	0	-16.0746	15	16	15	3UTR		0	0
hsa-miR-3194-3p	NM_001372066	TFAP2A	AGCTCTGCTGCTCACTGGCAGT#ACTGTCAGTGGGGCAGCC#......((((((((((((((((#)))))))))))).)))).	1581	1599	1	-25.9	0	1.21622e-09	0.309	0	0	-15.5666	16	18	12	3UTR		0	0
hsa-miR-3194-3p	NM_001372066	TFAP2A	AGCTCTGCTGCTCACTGGCAGT#ACAGGCCGTGAAGCCAGCAGAGA#..(((((((((((((.(((.((#))..))))))).)).))))))).	1678	1701	1	-24	1	0.00155505	0.529	0	0	-5.19005	18	23	7	3UTR		0	0
hsa-miR-514b-5p	NM_001372066	TFAP2A	TTCTCAAGAGGGAGGCAATCAT#TGAACCCATTGTTTCCCTCA#.......((((((((((((...#.)))))))))))).	2907	2927	1	-18.7	0	0.058937	0.618	0	0	-17.1102	12	14	12	3UTR		0	0
hsa-miR-4315	NM_001372066	TFAP2A	CCGCTTTCTGAGCTGGAC#TTCAGTTCAGATTGTA#..((..(((((((((((.#)))))))))))..)).	1865	1881	1	-17.7	0	0.0287425	0.662	0	0	-10.977	13	16	11	3UTR		0	0
hsa-miR-4327	NM_001372066	TFAP2A	GGCTTGCATGGGGGACTGG#CCACACCCCTGTGCCCTCATGTGGAGCCT#((((((((((((((((.((#.)).)).)))))))))).)))).	1638	1667	1	-25.1	1	0.00039874	0.368	0	0	-3.93757	18	23	10	3UTR		0	0
hsa-miR-2355-5p	NM_001372066	TFAP2A	ATCCCCAGATACAATGGACAA#GTTCATGGTACTGATTTAGAAATCCAGTGTTTGGGGG#..((((((((((..((((...#.)))))))))))))).	2225	2262	1	-20.5	1	0.000494522	0.632	0	0	-7.10297	14	16	14	3UTR		0	0
hsa-miR-2355-3p	NM_001372066	TFAP2A	ATTGTCCTTGCTGTTTGGAGAT#TGACAAACAGCTGGACAAA#.((((((..((((((((..(..#)..)))))))).)))))).	2313	2332	1	-20.8	1	0.0114006	0.735	0	0	-7.16335	15	19	8	3UTR		0	0
hsa-miR-4287	NM_001372066	TFAP2A	TCTCCCTTGAGGGCACTTT#GTGCCCTCATGTGGAGC#.(((((.(((((((((...#))))))))).).)))).	1648	1665	1	-25	0	4.98809e-05	0.368	0	0	-5.33701	14	17	9	3UTR	MIRT639292	0	0
hsa-miR-3615	NM_001372066	TFAP2A	TCTCTCGGCTCCTCGCGGCTC#GGCCGTGAAGCCAGCAGAGAA#((((((((((..((((((((.#)))))))))))).).))))).	1681	1702	1	-24.5	1	0.00139011	0.529	0	0	-10.1092	18	21	12	3UTR		0	0
hsa-miR-3667-5p	NM_001372066	TFAP2A	AAAGACCCATTGAGGAGAAGGT#GCCTTTTTTTTTTTATTTATCTGATCTTGTTTACCTCTTGTTTAGTGGGTTTTG#.(((((((((((((.((.((((#.)))).)).))))))))))))).	2145	2199	1	-21.8	1	0.00139642	0.662	0	0	-4.52877	19	23	13	3UTR		0	0
hsa-miR-550b-2-5p	NM_001372066	TFAP2A	ATGTGCCTGAGGGAGTAAGACA#GTTTAACTCTCCCTTGGCAA#...((((.(((((((..((((.#))))....))))))))))).	2866	2886	1	-19.6	0	0.0256903	0.574	0	0	-9.06122	15	20	11	3UTR		0	0
hsa-miR-4435	NM_001372066	TFAP2A	ATGGCCAGAGCTCACACAGAGG#CCTCCCCACCCGCTCCCACACCCCTGTGCCCTCATGTGGAGCCTAAGAGAACAGAACAGGCCGTG#((((((((.((((.((((((((#.)))).))))))))))..............)))))).	1623	1688	1	-24.9	1	0.0116393	0.485	0	0	-5.8508	20	37	10	3UTR		0	1
hsa-miR-4435	NM_001372066	TFAP2A	ATGGCCAGAGCTCACACAGAGG#TTCTGTATTTTCACTGGCCATA#((((((((.......((((((.#)))))).......)))))))).	2641	2663	1	-19.6	1	0.00777252	0.588	0	0	-15.2895	14	22	8	3UTR		0	1
hsa-miR-4444	NM_001372066	TFAP2A	CTCGAGTTGGAAGAGGCG#GCCTCTCCGACTCT#...(((((((.((((((.#))))))))))))).	1596	1610	1	-23.6	0	0.00217384	0.294	0	0	-9.33931	13	14	13	3UTR		0	0
hsa-miR-4462	NM_001372066	TFAP2A	TGACACGGAGGGTGGCTTGGGAA#CCCGAGTCTCCGGGACTGCCCTCTCGACTGTCAG#(((((((((((((((((((((..#)))))))).........)))))).))..))))).	1555	1589	1	-28.4	1	0.00013992	0.294	0	0	-3.93757	21	34	8	3UTR		0	0
hsa-miR-4468	NM_001372066	TFAP2A	AGAGCAGAAGGATGAGAT#TCTCTCTTTCTGTTCA#.(((((((((((.((((.#))))))))))))))).	2594	2610	1	-20.8	1	0.0575384	0.559	0	0	-5.08246	15	16	15	3UTR		0	0
hsa-miR-4472	NM_001372066	TFAP2A	GGTGGGGGGTGTTGTTTT#CGACCTCCCCACCC#(((((((((.((((....#))))))))))))).	1620	1634	1	-22.8	1	0.268156	0.309	0	0	-6.14858	13	14	13	3UTR		0	0
hsa-miR-4506	NM_001372066	TFAP2A	AAATGGGTGGTCTGAGGCAA#GTCTCCGGGACTGCCCT#....((((((((((((((..#)))))..))))))))).	1560	1577	1	-21.6	0	0.000157427	0.294	0	0	-9.54656	14	17	9	3UTR		0	0
hsa-miR-4524a-3p	NM_001372066	TFAP2A	TGAGACAGGCTTATGCTGCTAT#TGGCAGTAGTTTCCATGCCTGTCA#...(((((((...((((((((.#))))))))........))))))).	2700	2724	1	-22.5	0	0.0057039	0.574	0	0	-13.9752	15	24	8	3UTR		0	0
hsa-miR-4533	NM_001372066	TFAP2A	TGGAAGGAGGTTGCCGGACGCT#AGTGGGGCAGCCTCTCCGA#((((..(((((((((...((((#)))).))))))))))))).	1587	1606	1	-22.9	0	3.36897e-09	0.294	0	0	-10.1906	17	19	13	3UTR		0	0
hsa-miR-3976	NM_001372066	TFAP2A	TATAGAGAGCAGGAAGATTAATGT#GCAACCCTTCCTGCTGCTGCTAC#..((((((((((((((........#.))))))))).)).))).	1485	1508	1	-18.6	1	0.000960894	0.294	0	0	-4.957	14	18	9	3UTR		0	0
hsa-miR-4632-5p	NM_001372066	TFAP2A	GAGGGCAGCGTGGGTGTGGCGGA#CCGCTCCCACACCCCTGTGCCCTCA#(((((((..(.(((((((((((.#))))...))))))))..))))))).	1632	1657	1	-35.6	1	0.0111937	0.353	0	0	-10.1324	19	25	8	3UTR	MIRT746291	0	0
hsa-miR-4651	NM_001372066	TFAP2A	CGGGGTGGGTGAGGTCGGGC#TATTTATCTGATCTTGTTTACCTCT#.((((((((((((((((((.#.)))))))))))))))))).	2158	2183	1	-20.6	1	0.317604	0.706	0	0	-3.79332	18	20	18	3UTR		0	0
hsa-miR-4661-3p	NM_001372066	TFAP2A	CAGGATCCACAGAGCTAGTCCA#GGATTTTTTTCTCTGGGATTCATGA#((((((((.(((((..(((((.#))))).....))))))))))).)).	2260	2285	1	-20.6	1	0.00977759	0.603	0	0	-5.96246	18	25	11	3UTR		0	0
hsa-miR-4686	NM_001372066	TFAP2A	TATCTGCTGGGCTTTCTGGTGTT#AGGCCGTGAAGCCAGCAGAG#..((((((.((((((.((((.(.#).)))).)))))))))))).	1680	1700	1	-23.2	1	0.00169411	0.515	0	0	-6.24644	17	20	12	3UTR		0	0
hsa-miR-4722-3p	NM_001372066	TFAP2A	ACCTGCCAGCACCTCCCTGCAG#GCAGTTCTAGTTGCATTGTATTGAGTTGTGCTGGCAGT#..(((((((((((((..(((((#.)))))..)))..)))))))))).	2669	2707	1	-25.5	1	0.000106346	0.588	0	0	-5.19005	18	24	10	3UTR		0	0
hsa-miR-4758-5p	NM_001372066	TFAP2A	GTGAGTGGGAGCCGGTGGGGCTG#CCCCACCCGCTCCCACA#....((((((((.(((((((...#))))))).)))))))).	1626	1643	1	-33.6	0	0.118912	0.324	0	0	-10.8357	15	17	8	3UTR		0	0
hsa-miR-4788	NM_001372066	TFAP2A	TTACGGACCAGCTAAGGGAGGC#TCTCCCTTGGCAATTGCTCCT#....(((.(((((((((((((.#)))))))))))...)).))).	2873	2894	1	-22.3	0	0.00126891	0.574	0	0	-11.8602	16	21	11	3UTR		0	0
hsa-miR-4790-5p	NM_001372066	TFAP2A	ATCGCTTTACCATTCATGTT#GGTAAAGCGAC#.((((((((((.........#)))))))))).	2011	2022	1	-16.6	1	0.00117525	0.618	0	0	-10.2546	10	11	10	3UTR		0	0
hsa-miR-4799-3p	NM_001372066	TFAP2A	ACTGGCATGCTGCATTTATATA#TGTAGCATGTTAA#..((((((((((((........#)))))))))))).	2297	2310	1	-16.9	1	0.00129331	0.632	0	0	-5.9255	12	13	12	3UTR		0	0
hsa-miR-5087	NM_001372066	TFAP2A	GGGTTTGTAGCTTTGCTGGCATG#CGTGAAGCCAGCAGAGAAAAGTTCTGCCAAGTTTGTGAACCCT#((((((((((((((((((((...#.)))))))))).......)))).........)))))).	1684	1727	1	-25.7	1	0.070775	0.662	0	0	-3.93757	20	38	10	3UTR		0	0
hsa-miR-4524b-3p	NM_001372066	TFAP2A	GAGACAGGTTCATGCTGCTA#AGCAGCTGAACCCATTGTTTCC#((((((((((((.((((((.#))))))))))))...)))))).	2901	2923	1	-24.1	1	0.0687066	0.647	0	0	-5.22671	18	22	12	3UTR		0	0
hsa-miR-5580-5p	NM_001372066	TFAP2A	TGCTGGCTCATTTCATATGTGT#ACAGGCCGTGAAGCCAGCAG#(((((((((((...........#.)))).))))))).	1678	1698	1	-16.9	1	0.00063209	0.5	0	0	-10.3988	11	14	7	3UTR		0	1
hsa-miR-5591-5p	NM_001372066	TFAP2A	TGGGAGCTAAGCTATGGGTAT#CCCTTGGCAATTGCTCCTT#.((((((...((((.(((...#))).))))....)))))).	2876	2895	1	-20	1	0.000887565	0.559	0	0	-9.14131	13	19	6	3UTR		0	0
hsa-miR-5691	NM_001372066	TFAP2A	TTGCTCTGAGCTCCGAGAAAGC#CTTTCAACTTGGAGTTCAGAGCAGG#(((((((((((((((((.....#.))))))))))))))))).	2944	2969	1	-30.2	1	0.00045201	0.662	0	0	-3.93757	17	19	17	3UTR		0	1
hsa-miR-5739	NM_001372066	TFAP2A	GCGGAGAGAGAATGGGGAGC#CTCTCCTCTCTCTTTCTGTT#(((((((((((..((((((.#))))))..))))))))))).	2588	2608	1	-25.6	1	0.0837103	0.588	0	0	-8.57351	17	20	11	3UTR		0	0
hsa-miR-6165	NM_001372066	TFAP2A	CAGCAGGAGGTGAGGGGAG#CTCCTCTCTCTTTCTGTTC#.(((((((((.((((((((#)))))))).))))))))).	2590	2609	1	-24.8	1	0.0700649	0.574	0	0	-6.6181	17	19	9	3UTR	MIRT466427	0	0
hsa-miR-6501-3p	NM_001372066	TFAP2A	CCAGAGCAGCCTGCGGTAACAGT#GCTGTCTTTACCCAGGCGTATTTTTGTTCTTGGC#(((((((((((((.(((((((((#)))))...))))))))).......)))))).)).	2798	2832	1	-23.9	1	0.00940034	0.618	0	0	-4.79441	22	34	9	3UTR		0	0
hsa-miR-6730-5p	NM_001372066	TFAP2A	AGAAAGGTGGAGGGGTTGTCAGA#TTTGATAACCCTTCTATGTA#....(.(((((((((((((((((#))))))))))))))))).).	2449	2469	1	-24.7	0	0.0353973	0.721	0	0	-11.4475	18	20	17	3UTR		0	0
hsa-miR-6734-5p	NM_001372066	TFAP2A	TTGAGGGGAGAATGAGGTGGAGA#TCTCTCTCTCTCTCTCCTCTCT#..(((((((((..((((.(((((#))))).))))..))))))))).	2577	2599	1	-27	1	0.115112	0.588	0	0	-9.59293	18	22	9	3UTR		0	1
hsa-miR-6736-5p	NM_001372066	TFAP2A	CTGGGTGAGGGCATCTGTGGT#CCACACCCCTGTGCCCTCATGTGGA#(((.((((((((((.(((((.#))))).....)))))))))).))).	1638	1663	1	-25.5	0	9.59598e-05	0.368	0	0	-7.70505	18	25	10	3UTR		0	0
hsa-miR-6740-5p	NM_001372066	TFAP2A	AGTTTGGGATGGAGAGAGGAGA#TTTCCTCTCTCTCTCTCT#.....((((.((((((((((((#)))))))))))).)))).	2572	2590	1	-23.9	0	0.109622	0.588	0	0	-14.9081	16	18	12	3UTR		0	0
hsa-miR-6775-5p	NM_001372066	TFAP2A	TCGGGGCATGGGGGAGGGAGGCTGG#CCCGCCTCGACCTCCCCACCCGCTCCC#..(((((...((((((((((((.((#)).)))))..)))))))....))))).	1613	1640	1	-34.3	0	0.183723	0.324	0	0	-9.56953	19	27	7	3UTR		0	0
hsa-miR-6783-5p	NM_001372066	TFAP2A	TAGGGGAAAAGTCCTGATCCGG#CCAAGGGTTAGGGAATTTTCCTCTC#.(((((((((.(((((((((((#))..)))))))))..))))))))).	2556	2581	1	-23.3	1	0.000174378	0.603	0	0	-6.6181	20	25	9	3UTR		0	0
hsa-miR-6785-5p	NM_001372066	TFAP2A	TGGGAGGGCGTGGATGATGGTG#CGCCCCGCCCCTCCCAC#((((((((.((((.....((((#)))))))))))))))).	1414	1431	1	-25.6	1	0.328793	0.25	0	0	-6.8193	16	17	16	3UTR		0	0
hsa-miR-6785-5p	NM_001372066	TFAP2A	TGGGAGGGCGTGGATGATGGTG#TCCACTGTCCTCCCT#.(((((((((((((........#))))).)))))))).	2500	2515	1	-24.2	1	0.263317	0.721	0	0	-4.76182	13	15	8	3UTR		0	0
hsa-miR-6793-5p	NM_001372066	TFAP2A	TGTGGGTTCTGGGTTGGGGTGA#CGCCTCGACCTCCCCACCCGCT#.((((((...(((((((((((.#)))))))))))....)))))).	1615	1637	1	-27.9	1	0.0220048	0.294	0	0	-8.40586	17	22	11	3UTR		0	0
hsa-miR-6801-5p	NM_001372066	TFAP2A	TGGTCAGAGGCAGCAGGAAATGA#TGCTGCTGCTGCTGCCG#.((.(((.((((((((.(.....#).)))))))).))))).	1508	1525	1	-22.5	0	5.18017e-05	0.265	0	0	-9.13898	14	17	8	3UTR		0	0
hsa-miR-6807-5p	NM_001372066	TFAP2A	GTGAGCCAGTGGAATGGAGAGG#TTCTGTATTTTCACTGGCCATA#(((.((((((((((((.((((.#)))).))))).)))))))))).	2641	2663	1	-22.4	0	0.00777252	0.588	0	0	-6.9696	19	22	10	3UTR		0	0
hsa-miR-6817-3p	NM_001372066	TFAP2A	TCTCTCTGACTCCATGGCA#GCCGTGAAGCCAGCAGAGAA#((((((((.((.((((((.#)))))).)).))).))))).	1682	1702	1	-21.7	1	0.00139011	0.529	0	0	-8.34077	16	20	6	3UTR		0	0
hsa-miR-6833-5p	NM_001372066	TFAP2A	GTGTGGAAGATGGGAGGAGAAA#TCTCCTCTCTCTTTCT#....((((((.(((((((((..#))))))))))))))).	2589	2605	1	-22.2	0	0.152812	0.574	0	0	-12.3713	15	16	15	3UTR		0	0
hsa-miR-6838-5p	NM_001372066	TFAP2A	AAGCAGCAGTGGCAAGACTCCT#GGGATCAGCAACCCTTCCTGCTGCTGCTACTGCTGCTG#.(((((((((((((........#.))))))))))))).	1478	1516	1	-25.1	1	3.42387e-05	0.265	0	0	-4.76182	13	15	13	3UTR	MIRT466430	0	1
hsa-miR-6847-5p	NM_001372066	TFAP2A	ACAGAGGACAGTGGAGTGTGAGC#ATATTCCACTGTGTCTGTA#(((((..((((((((((((....#)))))))))))).))))).	2980	2999	1	-23.3	0	1.85564e-06	0.632	0	0	-7.38222	17	19	12	3UTR		0	0
hsa-miR-6854-5p	NM_001372066	TFAP2A	AAGCTCAGGTTTGAGAACTGCTGA#AGCAGTTCTAGTTGCATTGTATTGAGTTG#.(((((((((...(((((((((..#)))))))))....))......))))))).	2668	2697	1	-19.2	1	0.0110712	0.574	0	0	-11.254	18	29	9	3UTR		0	0
hsa-miR-6855-5p	NM_001372066	TFAP2A	TTGGGGTTTGGGGTGCAGACATTGC#TCTGCACCCGCCTCGAC#(((((((...(((((((((......#)))))))))))))))).	1607	1624	1	-25.2	1	0.0391004	0.279	0	0	-8.55011	16	17	16	3UTR		0	0
hsa-miR-6862-5p	NM_001372066	TFAP2A	CGGGCATGCTGGGAGAGACTTT#GAGTTTAACTCTCCCTTGGCAATTGCTCC#.((((((((((((((((.....#.)))))))..))))..))))).	2864	2893	1	-23.3	1	0.00169824	0.588	0	0	-3.79332	16	22	7	3UTR		0	0
hsa-miR-6865-5p	NM_001372066	TFAP2A	TAGGTGGCAGAGGAGGGACTTCA#GAAGTTTTTCCTCTTTAAGGTAAAGCGACCA#..(((.((((((((((((((((.#))))))))))))))..........)).))).	1993	2024	1	-26.8	0	0.00160763	0.588	0	0	-6.85796	19	31	14	3UTR		0	0
hsa-miR-6875-3p	NM_001372066	TFAP2A	ATTCTTCCTGCCCTGGCTCCAT#TGGAGTTCAGAGCAGGGT#.....((((((.(((((((((.#)))))).))).)))))).	2953	2971	1	-22.5	0	0.00191283	0.662	0	0	-17.0124	15	18	6	3UTR		0	0
hsa-miR-6879-3p	NM_001372066	TFAP2A	TGTCACCCGCTCCTTGCCCAG#GCGCCCACCCTCCGGCGGGTGACAG#(((((((((((..........#.))))))))))).	1449	1474	1	-21.8	1	2.09099e-07	0.265	0	0	-10.3988	11	13	11	3UTR		0	1
hsa-miR-6887-5p	NM_001372066	TFAP2A	TGGGGGGACAGATGGAGAGGACA#TCCTCTCTCTCTCTCTCTCCT#.(((((((.(((.((((((((..#)))))))).))).))))))).	2574	2595	1	-27.5	1	0.117582	0.574	0	0	-6.13885	18	21	8	3UTR		0	0
hsa-miR-6891-5p	NM_001372066	TFAP2A	TAAGGAGGGGGATGAGGGG#TCTCTCTCTCTCTCCTC#..((((((((((.((((((#)))))))))))))))).	2579	2596	1	-23	1	0.127291	0.588	0	0	-6.24613	16	17	16	3UTR		0	0
hsa-miR-6893-5p	NM_001372066	TFAP2A	CAGGCAGGTGTAGGGTGGAGC#GCCCTCTCGACTGTCAGTGGGGCAGCCTCTCCGACTCTGCACCCGCCTC#.((((.((((((((((((((.#.)))).)))))))))).)))).	1572	1621	1	-29.9	0	0.0266215	0.294	0	0	-5.69428	18	22	10	3UTR		0	0
hsa-miR-7107-3p	NM_001372066	TFAP2A	TGGTCTGTTCATTCTCTCTTTTTGGCC#AGAGAACAGAACAGGCCGT#((((((((((.((((((..........#))))))..)))))))))).	1668	1687	1	-20.9	1	0.0132599	0.471	0	0	-6.76235	16	19	10	3UTR		0	0
hsa-miR-7110-5p	NM_001372066	TFAP2A	TGGGGGTGTGGGGAGAGAGAG#CTCGACCTCCCCACCCGCTCCCAC#(((((((((((((((...(((#)))...))))))))..))))))).	1618	1642	1	-29.6	1	0.13357	0.324	0	0	-4.17062	18	24	8	3UTR		0	0
hsa-miR-7112-5p	NM_001372066	TFAP2A	ACGGGCAGGGCAGTGCACCCTG#GGGACTGCCCTCTCGA#.((((.((((((((...(((..#))))))))))))))).	1566	1582	1	-24.2	0	9.19827e-05	0.309	0	0	-6.66278	15	16	15	3UTR		0	0
hsa-miR-7157-3p	NM_001372066	TFAP2A	TCTGTGCTACTGGATGAAGAGT#TTTTTTATTCAGTGGCT#.....((((((((((((((((.#)))))))))))))))).	2784	2801	1	-19.7	0	0.0103878	0.647	0	0	-13.6656	16	17	16	3UTR		0	0
hsa-miR-4433b-3p	NM_001372066	TFAP2A	CAGGAGTGGGGGGTGGGACGT#TCCCGCCCCGCCCCTCCC#..((((.(((((((((((...#))))))))).)).)))).	1411	1429	1	-29.7	0	0.380654	0.235	0	0	-6.50069	15	18	9	3UTR		0	0
hsa-miR-1273h-5p	NM_001372066	TFAP2A	CTGGGAGGTCAAGGCTGCAGT#GCAGCCTCTCCGACTCTGCACCCGCCTCGACCTCCCC#..((((((((.(((((((((.#.)))))...)))).)))))))).	1593	1630	1	-30	1	0.0869926	0.279	0	0	-7.78178	17	23	8	3UTR		0	0
hsa-miR-8054	NM_001372066	TFAP2A	GAAAGTACAGATCGGATGGGT#CCACCTGGTATTCTGTATTTTCA#(((((((((((((((.(((..#))).))))...))))))))))).	2631	2654	1	-20.2	1	0.0204461	0.574	0	0	-4.17062	18	23	11	3UTR		0	0
hsa-miR-8055	NM_001372066	TFAP2A	CTTTGAGCACATGAGCAGACGGA#TCCTCTCTCTTTCTGTTCAAAGA#(((((((((...(((.(((.(((#)))))))))....))))))))).	2591	2614	1	-18.9	1	0.012879	0.559	0	0	-11.5847	18	23	9	3UTR		0	0
hsa-miR-8056	NM_001372066	TFAP2A	CGTGGATTGTCTGGATGCAT#TGTATTCAGACAAATGACACA#.(((..(((((((((((((.#)))))))))))))....))).	2995	3016	1	-20.2	0	0.0188905	0.691	0	0	-9.81332	16	21	13	3UTR		0	0
hsa-miR-8068	NM_001372066	TFAP2A	TGTTTGTTGTAAGGATCGTTGT#GCAATTGCTCCTTGCAATAAGCAG#(((((((((((((((.((((((#))))).).))))))))))))))).	2882	2906	1	-22.7	1	9.13765e-05	0.588	0	0	-4.17062	21	24	15	3UTR		0	0
hsa-miR-8079	NM_001372066	TFAP2A	CAGTGATCGTCTCTGCTGGC#GCCAGCAGAGAAAAGTTCTGC#(((......(((((((((((#)))))))))))......))).	1690	1711	1	-23.9	0	8.02758e-05	0.588	0	0	-17.9033	14	21	11	3UTR		0	0
hsa-miR-9500	NM_001372066	TFAP2A	AAGGGAAGATGGTGACCAC#TGCGCTTCATGGGACTGAGTCACCACCTTCCCTTA#((((((((.(((((((((.#.)).))))))).)))))))).	1825	1860	1	-26	1	0.299606	0.559	0	0	-4.99396	17	21	8	3UTR		0	1
hsa-miR-10392-5p	NM_001372066	TFAP2A	GCGCTTCGACGGGCTGGGCTGTG#ACAGAACAGGCCGTGAAGCCAGCA#(((((((.((((.(((..((((.#))))..))).)))))))))..)).	1673	1697	1	-28.2	1	0.000654307	0.485	0	0	-7.54034	18	24	9	3UTR		0	0
hsa-miR-10400-3p	NM_001372066	TFAP2A	CTGGGCTCCCGGACGAGGCGGG#CCGCCGCCGCTGCCCTTGGGTCCCCCCGAGTCTCCGGGACTGCCCT#..(((((((((((.((..((((#.))))..)))))))))..)))).	1531	1577	1	-30.6	1	0.000157427	0.294	0	0	-5.81384	17	23	9	3UTR		0	0
hsa-miR-10401-3p	NM_001372066	TFAP2A	ACCTCGCCGTCCCGCCCGCCG#CGGCGGGTGACAGCTCCGGGA#.(((.((.(((..((((((((#))))))))))).))...))).	1461	1482	1	-24.2	0	1.04447e-06	0.279	0	0	-14.8619	16	21	11	3UTR		0	0
hsa-miR-11401	NM_001372066	TFAP2A	TCACGTCTGCGGCTGTCACG#CGTGAAGCCAGCAGAGAAAAGTTCTGCCAAGTTTGTGAA#((((((((((((((.(((((#))))))))).)))))..................))))).	1684	1723	1	-21.4	1	0.00161559	0.647	0	0	-4.67302	19	39	9	3UTR		0	0
hsa-miR-12113	NM_001372066	TFAP2A	TCTGAACTCTATGTGGGATTAG#TTTCAACTTGGAGTTCAGAG#(((((((((((.((.(((....#.))).)).))))))))))).	2945	2965	1	-19.2	1	0.0103604	0.676	0	0	-8.01983	16	20	11	3UTR		0	1
hsa-miR-27a-5p	NM_001032280	TFAP2A	AGGGCTTAGCTGCTTGTGAGCA#TGCTCCTTGCAATAAGCAGCTGAACCCA#.(((.(((((((((((((((((#)))))......)))))))))))).))).	3575	3603	1	-28.2	0	0.00292018	0.603	4.65525	4.44182	-7.91236	20	28	12	3UTR		0	0
hsa-miR-27a-3p	NM_001032280	TFAP2A	TTCACAGTGGCTAAGTTCCGC#GAATTTAGCCCTGTT#...((((.((((((((((...#)))))))))))))).	2971	2986	1	-19	0	0.0294732	0.588	3.35621	4.95529	-8.82818	14	15	14	3UTR		0	0
hsa-miR-31-5p	NM_001032280	TFAP2A	AGGCAAGATGCTGGCATAGCT#AGTTGTGCTGGCAGTAGTTTCCATGCCTG#(((((.(((((((((((((((#)))))))))))))......))..))))).	3380	3409	1	-23	0	0.00286047	0.559	1.89652	2.26019	-5.83853	20	29	13	3UTR		0	0
hsa-miR-198	NM_001032280	TFAP2A	GGTCCAGAGGGGAGATAGGTTC#TCTCTCTCCTCTCTCTTTCTGTTCAAAGAACTTCAAACATTTGGGACCA#(((((((((((((((.(((...#))).)))))))))).............................))))).	3273	3322	1	-24.5	1	0.00782717	0.603	1.20002	1.14812	-4.17062	18	49	10	3UTR		0	0
hsa-miR-218-2-3p	NM_001032280	TFAP2A	CATGGTTCTGTCAAGCACCGCG#GTTGTGCTGGCAGTAGTTTCCATGC#(((((..(((((.(((((.((.#)).))))))))))......))))).	3381	3406	1	-20.7	0	0.000727555	0.574	2.0088	2.21561	-8.67135	17	25	10	3UTR		0	0
hsa-let-7i-3p	NM_001032280	TFAP2A	CTGCGCAAGCTACTGCCTTGCT#GCTGGCAGTAGTTTCCATGCC#..(((.(((((((((((..((.#)).)))))))))))...))).	3386	3407	1	-21.4	0	0.00519642	0.559	1.63233	2.44224	-6.85796	16	21	11	3UTR		0	0
hsa-miR-27b-3p	NM_001032280	TFAP2A	TTCACAGTGGCTAAGTTCTGC#CATGAATTTAGCCCTGTT#...((((.((((((((((((.#)).)))))))))))))).	2968	2986	1	-19	0	0.0294732	0.588	3.84192	5.04541	-8.82818	16	18	14	3UTR		0	0
hsa-miR-141-3p	NM_001032280	TFAP2A	TAACACTGTCTGGTAAAGATGG#CTGTCTTTACCCAGGCGT#......((((((((((((((((#))))))))))).))))).	3487	3505	1	-18.3	0	0.000955899	0.662	5.65927	4.94377	-15.5666	16	18	11	3UTR		1	0
hsa-miR-150-5p	NM_001032280	TFAP2A	TCTCCCAACCCTTGTACCAGTG#TATTGTCTTTAAACCAAGGGTTAGGGAA#..((((((((((((........#.)))))))).)))).	3231	3259	1	-19.5	1	0.000168099	0.618	1.52564	1.2088	-5.9255	12	15	8	3UTR		0	0
hsa-miR-302c-3p	NM_001032280	TFAP2A	TAAGTGCTTCCATGTTTCAGTGG#TCACTGGCCATATTGGAAGCAGTTC#.((.(((((((((((.(((((((#)))))))..)))).))))))).)).	3339	3364	1	-20.8	0	0.000676382	0.588	0.872788	1.61004	-7.0584	20	25	7	3UTR		0	0
hsa-miR-331-5p	NM_001032280	TFAP2A	CTAGGTATGGTCCCAGGGATCC#TTTGGGACCACCTGGT#((((((..(((((((((.....#))))))))))))))).	3312	3328	1	-21.9	0	0.00118893	0.618	0.894804	1.22614	-7.7949	15	16	15	3UTR		0	0
hsa-miR-486-3p	NM_001032280	TFAP2A	CGGGGCAGCTCAGTACAGGAT#TTGTATTGAGTTGTGCTGG#(((.((((((((((((((...#)))))))))))))).))).	3372	3391	1	-24.9	0	0.000371494	0.574	2.15599	2.15245	-6.9696	17	19	14	3UTR		0	0
hsa-miR-491-5p	NM_001032280	TFAP2A	AGTGGGGAACCCTTCCATGAGG#CTTCATGGGACTGAGTCACCACC#.((((.((....((((((((((#)))))))))).....)).)))).	2517	2540	1	-19.3	0	0.000141288	0.618	5.56263	3.77502	-14.1648	16	23	10	3UTR		0	0
hsa-miR-146b-5p	NM_001032280	TFAP2A	TGAGAACTGAATTCCATAGGCTG#GGCCATATTGGAAGCAGTTCTA#..(((((((..(((((((((((.#)))).))).)))).))))))).	3344	3366	1	-21	1	0.000750323	0.603	0.89311	1.6893	-9.02428	18	22	7	3UTR		0	0
hsa-miR-526b-5p	NM_001032280	TFAP2A	CTCTTGAGGGAAGCACTTTCTGT#GCAGCTGAACCCATTGTTTCCCTCAAGT#..(((((((((((((........#.))))))))))))).	3590	3618	1	-21.5	1	0.0427447	0.632	4.68296	4.23206	-5.19005	13	15	13	3UTR		0	0
hsa-miR-517-5p	NM_001032280	TFAP2A	CCTCTAGATGGAAGCACTGTCT#GGCAGTAGTTTCCATG#.......((((((((((((((.#)))))).)))))))).	3389	3405	1	-19.4	0	0.000371851	0.574	1.61912	2.38898	-17.1102	14	16	8	3UTR		0	0
hsa-miR-583	NM_001032280	TFAP2A	CAAAGAGGAAGGTCCCATTAC#GGGATTTTTTTCTCTGG#((.(((((((((((((.....#))))))))))))).)).	2947	2964	1	-18.4	0	0.000209649	0.618	3.4394	4.65132	-5.49511	15	17	13	3UTR		0	1
hsa-miR-598-3p	NM_001032280	TFAP2A	TACGTCATCGTTGTCATCGTCA#GATGATGACAACA#.........((((((((((((.#)))))))))))).	2600	2613	1	-19.7	0	0.0244494	0.779	4.19731	4.43826	-20.4803	12	13	12	3UTR		0	0
hsa-miR-600	NM_001032280	TFAP2A	ACTTACAGACAAGAGCCTTGCTC#GAGCAGGGTATCATTTAGATATTCCACTGTGTCTGTAT#...((((((((...(((((((((#)))))))))....................)))))))).	3650	3688	1	-22.1	0	2.44017e-06	0.632	3.93897	4.5345	-12.0073	17	38	9	3UTR		0	0
hsa-miR-625-5p	NM_001032280	TFAP2A	AGGGGGAAAGTTCTATAGTCC#GGGTTAGGGAATTTTCCTCTC#.(((((((((((((.((((((#)))))).))))))))))))).	3248	3269	1	-20.2	1	0.000174378	0.603	0.969318	1.62862	-4.52877	19	21	13	3UTR		0	0
hsa-miR-654-3p	NM_001032280	TFAP2A	TATGTCTGCTGACCATCACCTT#AAGGTGACAAACAGCTGGACAA#..(((((((((....(((((((#)))))))....)))).))))).	2997	3019	1	-19.7	1	0.0128337	0.721	6.55906	4.28447	-11.1852	16	22	7	3UTR		0	0
hsa-miR-671-3p	NM_001032280	TFAP2A	TCCGGTTCTCAGGGCTCCACC#GTGGAGCCTAAGAGAACAGAA#((..((((((.(((((((((.#)))))))))..)))))).)).	2346	2367	1	-26.2	0	0.0466732	0.456	4.6819	5.3828	-11.3519	17	21	9	3UTR		0	0
hsa-miR-1298-3p	NM_001032280	TFAP2A	CATCTGGGCAACTGACTGAAC#GTTTCCATGCCTGTCAATGTATCATAGTCCTTTGTTGCCCAGATA#.(((((((((((.(((((...#.)))))....))))))))))).	3396	3441	1	-22.8	1	0.0162088	0.662	3.35256	2.72335	-5.08246	16	22	11	3UTR		0	1
hsa-miR-541-5p	NM_001032280	TFAP2A	AAAGGATTCTGCTGTCGGTCCCACT#AGTTGTGCTGGCAGTAGTTTCCA#...(((..(((((((((((.(.(((#))).).)))))))))))..))).	3380	3403	1	-24.3	0	7.123e-05	0.603	1.33512	2.40756	-10.3719	18	23	11	3UTR		0	0
hsa-miR-921	NM_001032280	TFAP2A	CTAGTGAGGGACAGAACCAGGATTC#GAACTTCAAACATTTGGGACCACCTGGTATTCTGTATTTTCACTGGC#(((((((((((((((((((((....#.))))))..))))).)))))))))).	3300	3347	1	-26.4	1	0.0184985	0.588	1.46721	1.09116	-3.93757	21	26	10	3UTR		0	0
hsa-miR-509-3-5p	NM_001032280	TFAP2A	TACTGCAGACGTGGCAATCATG#TGTCATGTCTTCAGTT#.((((.((((((((((......#)))))))))).)))).	2662	2678	1	-19.1	0	0.0118243	0.632	2.90046	4.18303	-5.69428	14	16	10	3UTR		0	0
hsa-miR-1285-3p	NM_001032280	TFAP2A	TCTGGGCAACAAAGTGAGACCT#GTTTCCATGCCTGTCAATGTATCATAGTCCTTTGTTGCCCAGAT#((((((((((((((.((.....#.)))))))))))))))).	3396	3440	1	-26	1	0.0173758	0.647	2.79287	2.60199	-4.67302	16	18	16	3UTR		0	1
hsa-miR-103b	NM_001032280	TFAP2A	TCATAGCCCTGTACAATGCTGCT#AGTTGCATTGTATTGAGTTGTGC#.((((((.(.(((((((((.(((#))).))))))))).).)))))).	3365	3388	1	-20.1	1	0.0137711	0.588	2.0066	1.95555	-7.34947	19	23	9	3UTR		0	0
hsa-miR-3146	NM_001032280	TFAP2A	CATGCTAGGATAGAAAGAATGG#CTGTTGTAGCATGT#(((((((.(((((.........#))))).))))))).	2981	2995	1	-16.2	1	0.0012006	0.618	5.9593	5.22357	-8.07655	12	14	7	3UTR		0	0
hsa-miR-3154	NM_001032280	TFAP2A	CAGAAGGGGAGTTGGGAGCAGA#TCTCTCTCCTCTCTCTTTCTGT#(((((((((((..(((((.(((#))))))))..))))))))))).	3273	3295	1	-25.3	1	0.0885193	0.574	0.902808	1.2893	-8.57351	19	22	11	3UTR		0	1
hsa-miR-3173-5p	NM_001032280	TFAP2A	TGCCCTGCCTGTTTTCTCCTTT#GGAGTTCAGAGCAGGGTAT#(((((((((((....((((...#))))..))).)))))))).	3642	3661	1	-24.4	1	0.00656821	0.647	4.16015	4.58023	-10.1658	15	19	8	3UTR		0	0
hsa-miR-548w	NM_001032280	TFAP2A	AAAAGTAACTGCGGTTTTTGCCT#GGCAACACGATTCGCAGTTATA#....((((((((((.(((((((.#)))))...)).)))))))))).	2727	2749	1	-20.5	0	0.00759289	0.588	4.10019	4.95321	-10.282	17	22	10	3UTR		0	1
hsa-miR-3192-5p	NM_001032280	TFAP2A	TCTGGGAGGTTGTAGCAGTGGAA#TTCCACTGTCCTCCCT#...((((((.....(((((((((#))))))))))))))).	3187	3203	1	-24.1	0	0.263317	0.721	0.465497	1.51716	-16.0746	15	16	15	3UTR		0	0
hsa-miR-3194-3p	NM_001032280	TFAP2A	AGCTCTGCTGCTCACTGGCAGT#ACAGGCCGTGAAGCCAGCAGAGA#..(((((((((((((.(((.((#))..))))))).)).))))))).	2366	2389	1	-24	1	0.00155505	0.529	6.05643	5.25418	-5.19005	18	23	7	3UTR		0	0
hsa-miR-4324	NM_001032280	TFAP2A	CCCTGAGACCCTAACCTTAA#AGGGTTAGGGAATTTTCCTCTCT#....((((((((((((((..#))))))))))........)))).	3247	3270	1	-18.1	0	0.00021742	0.603	1.06943	1.45772	-9.54656	14	23	10	3UTR		0	0
hsa-miR-4270	NM_001032280	TFAP2A	TCAGGGAGTCAGGGGAGGGC#CTCTCCCTTGGCAATTGCTCCTTGC#.((((((((((((((((((.#))))))))))......)))))))).	3560	3585	1	-26.5	1	0.000328146	0.559	4.92169	5.04385	-3.79332	18	25	10	3UTR		0	0
hsa-miR-4289	NM_001032280	TFAP2A	GCATTGTGCAGGGCTATCA#TAGCCCTGTTGTAGCA#((.....(((((((((...#)))))))))....)).	2976	2992	1	-18.1	0	0.00846872	0.618	3.45829	4.91205	-16.0908	11	16	9	3UTR		0	0
hsa-miR-3908	NM_001032280	TFAP2A	GAGCAATGTAGGTAGACTGTTT#AAGCAGTTCTAGTTGCATTGTA#..(((((((((.((((((((((#))))))).))).))))))))).	3355	3377	1	-21.8	1	0.00628446	0.559	1.19101	1.70044	-8.3038	19	22	9	3UTR		0	0
hsa-miR-4428	NM_001032280	TFAP2A	CAAGGAGACGGGAACATGGAGC#GTTCCATGTCATGTCTTCA#...(((((((.(.(((((((((#)))))))))).))))))).	2656	2675	1	-22	0	0.0675255	0.647	4.11797	4.27587	-10.6284	17	19	10	3UTR		0	0
hsa-miR-4468	NM_001032280	TFAP2A	AGAGCAGAAGGATGAGAT#TCTCTCTTTCTGTTCA#.(((((((((((.((((.#))))))))))))))).	3282	3298	1	-20.8	1	0.0575384	0.559	1.36214	1.2088	-5.08246	15	16	15	3UTR		0	0
hsa-miR-3689d	NM_001032280	TFAP2A	GGGAGGTGTGATCTCACACTCG#TGGGACTGAGTCACCACCTTCCC#(((((((((((.((((..((((#))))..)))))))).))))))).	2522	2545	1	-23	1	0.0225667	0.574	6.08986	3.87842	-7.28438	19	23	8	3UTR		0	0
hsa-miR-4482-5p	NM_001032280	TFAP2A	AACCCAGTGGGCTATGGAAATG#TATTTTCACTGGCCATATTGGA#...(((((((((((((((((((#)))))))).))))).)))))).	3334	3356	1	-19.5	0	0.00215835	0.588	0.877505	1.63728	-6.51454	19	22	8	3UTR		0	0
hsa-miR-4524a-3p	NM_001032280	TFAP2A	TGAGACAGGCTTATGCTGCTAT#TGGCAGTAGTTTCCATGCCTGTCA#...(((((((...((((((((.#))))))))........))))))).	3388	3412	1	-22.5	0	0.0057039	0.574	1.26082	2.4249	-13.9752	15	24	8	3UTR		0	0
hsa-miR-3976	NM_001032280	TFAP2A	TATAGAGAGCAGGAAGATTAATGT#GGGTTAGGGAATTTTCCTCTCTCTC#...((((((.(((((((((.....#.))))))))))))))).	3248	3273	1	-18.8	0	0.0335114	0.588	0.905812	1.57908	-7.75705	15	17	15	3UTR		0	0
hsa-miR-3976	NM_001032280	TFAP2A	TATAGAGAGCAGGAAGATTAATGT#GCAACCCTTCCTGCTGCTGCTAC#..((((((((((((((........#.))))))))).)).))).	2173	2196	1	-18.6	1	0.000960894	0.294	5.82381	5.89651	-4.957	14	18	9	3UTR		0	0
hsa-miR-4640-5p	NM_001032280	TFAP2A	TGGGCCAGGGAGCAGCTGGTGGG#CCCACCCGCTCCCACACCCCTGTGCCCT#.(((((((((.(.(((.((((((#)))))).))).).....))))).)))).	2315	2343	1	-31	1	0.00413056	0.353	5.10635	5.44464	-7.90723	19	28	6	3UTR		0	0
hsa-miR-4686	NM_001032280	TFAP2A	TATCTGCTGGGCTTTCTGGTGTT#AGGCCGTGAAGCCAGCAGAG#..((((((.((((((.((((.(.#).)))).)))))))))))).	2368	2388	1	-23.2	1	0.00169411	0.515	5.69374	5.47445	-6.24644	17	20	12	3UTR		0	0
hsa-miR-4709-3p	NM_001032280	TFAP2A	TTGAAGAGGAGGTGCTCTGTAGC#GTTGTAGAAGTTTTTCCTCTTTAAG#((((((((((((.((((((((((#)))))))).)).)))))))))))).	2675	2700	1	-21.2	1	0.00677204	0.618	4.95904	3.87739	-5.22671	22	25	12	3UTR		0	0
hsa-miR-203b-5p	NM_001032280	TFAP2A	TAGTGGTCCTAAACATTTCACA#TTTGGGACCACC#..(((((((((((.........#))))))))))).	3312	3324	1	-17.3	1	0.00768303	0.618	0.812745	1.2732	-6.78234	11	12	11	3UTR		0	0
hsa-miR-4712-5p	NM_001032280	TFAP2A	TCCAGTACAGGTCTCTCATTTC#TGTATTGAGTTGTGCTGGC#.(((((((((.((.........#.)).))))))))).	3373	3392	1	-16.6	1	0.000204955	0.574	2.44691	2.06329	-8.44344	11	14	9	3UTR		0	0
hsa-miR-4722-3p	NM_001032280	TFAP2A	ACCTGCCAGCACCTCCCTGCAG#GCAGTTCTAGTTGCATTGTATTGAGTTGTGCTGGCAGT#..(((((((((((((..(((((#.)))))..)))..)))))))))).	3357	3395	1	-25.5	1	0.000106346	0.588	1.96917	1.9444	-5.19005	18	24	10	3UTR		0	0
hsa-miR-4747-5p	NM_001032280	TFAP2A	AGGGAAGGAGGCTTGGTCTTAG#TGGGACTGAGTCACCACCTTCCCTT#((((((((.((((((((((((.#))))))))))))....)))))))).	2522	2547	1	-26.8	1	0.0988057	0.559	6.455	3.79963	-4.99396	20	25	12	3UTR		0	1
hsa-miR-4758-5p	NM_001032280	TFAP2A	GTGAGTGGGAGCCGGTGGGGCTG#CCCCACCCGCTCCCACA#....((((((((.(((((((...#))))))).)))))))).	2314	2331	1	-33.6	0	0.118912	0.324	5.80708	5.3318	-10.8357	15	17	8	3UTR		0	0
hsa-miR-4790-5p	NM_001032280	TFAP2A	ATCGCTTTACCATTCATGTT#GGTAAAGCGAC#.((((((((((.........#)))))))))).	2699	2710	1	-16.6	1	0.00117525	0.618	4.8086	4.16631	-10.2546	10	11	10	3UTR		0	0
hsa-miR-4794	NM_001032280	TFAP2A	TCTGGCTATCTCACGAGACTGT#ACAGGCCGTGAAGCCAGC#.((((((...(((((.(.((((#)))).)))))))))))).	2366	2384	1	-19.2	1	0.000690223	0.5	6.02883	5.42419	-8.6389	16	18	12	3UTR		0	0
hsa-miR-4797-5p	NM_001032280	TFAP2A	GACAGAGTGCCACTTACTGAA#TGGTATTCTGTA#.(((((((((((.........#))))))))))).	3324	3336	1	-16.2	1	0.0119252	0.603	0.992875	1.35493	-6.90779	11	12	11	3UTR		0	0
hsa-miR-4799-3p	NM_001032280	TFAP2A	ACTGGCATGCTGCATTTATATA#TGTAGCATGTTAA#..((((((((((((........#)))))))))))).	2985	2998	1	-16.9	1	0.00129331	0.632	4.66634	5.15581	-5.9255	12	13	12	3UTR		0	0
hsa-miR-5739	NM_001032280	TFAP2A	GCGGAGAGAGAATGGGGAGC#CTCTCCTCTCTCTTTCTGTT#(((((((((((..((((((.#))))))..))))))))))).	3276	3296	1	-25.6	1	0.0837103	0.588	0.956847	1.28806	-8.57351	17	20	11	3UTR		0	0
hsa-miR-6124	NM_001032280	TFAP2A	GGGAAAAGGAAGGGGGAGGA#TCCTCTCTCTTTCTGTTCA#..(((.((((((((((((((#)))))))))))))).))).	3279	3298	1	-23.5	0	0.0575384	0.559	0.528398	1.23233	-6.85796	17	19	14	3UTR		0	1
hsa-miR-6501-3p	NM_001032280	TFAP2A	CCAGAGCAGCCTGCGGTAACAGT#GCTGTCTTTACCCAGGCGTATTTTTGTTCTTGGC#(((((((((((((.(((((((((#)))))...))))))))).......)))))).)).	3486	3520	1	-23.9	1	0.00940034	0.618	6.26979	5.16421	-4.79441	22	34	9	3UTR		0	0
hsa-miR-6730-5p	NM_001032280	TFAP2A	AGAAAGGTGGAGGGGTTGTCAGA#TTTGATAACCCTTCTATGTA#....(.(((((((((((((((((#))))))))))))))))).).	3137	3157	1	-24.7	0	0.0353973	0.721	1.37008	0.930166	-11.4475	18	20	17	3UTR		0	0
hsa-miR-6740-5p	NM_001032280	TFAP2A	AGTTTGGGATGGAGAGAGGAGA#TTTCCTCTCTCTCTCTCT#.....((((.((((((((((((#)))))))))))).)))).	3260	3278	1	-23.9	0	0.109622	0.588	1.48373	1.63357	-14.9081	16	18	12	3UTR		0	0
hsa-miR-6740-3p	NM_001032280	TFAP2A	TGTCTTCTCTCCTCCCAAACAG#TGTTTGGGGGATTTTTTTCTCTGGGAT#.....(((((((.((((((((.#)))))))))))...........)))).	2940	2967	1	-17	0	0.00312072	0.618	3.39691	4.8083	-14.9547	15	27	11	3UTR		0	0
hsa-miR-6783-5p	NM_001032280	TFAP2A	TAGGGGAAAAGTCCTGATCCGG#CCAAGGGTTAGGGAATTTTCCTCTC#.(((((((((.(((((((((((#))..)))))))))..))))))))).	3244	3269	1	-23.3	1	0.000174378	0.603	1.40371	1.5184	-6.6181	20	25	9	3UTR		0	0
hsa-miR-6821-5p	NM_001032280	TFAP2A	GTGCGTGGTGGCTCGAGGCGGGG#CCCGCCTCGACCTCCCCACCCGCT#..(((.(((((.((((((((((.#)))))))))).....)))))))).	2301	2325	1	-34.5	0	0.0220048	0.294	4.88164	5.55005	-10.2048	18	24	10	3UTR		0	0
hsa-miR-6833-5p	NM_001032280	TFAP2A	GTGTGGAAGATGGGAGGAGAAA#TCTCCTCTCTCTTTCT#....((((((.(((((((((..#))))))))))))))).	3277	3293	1	-22.2	0	0.152812	0.574	0.377433	1.27815	-12.3713	15	16	15	3UTR		0	0
hsa-miR-6847-5p	NM_001032280	TFAP2A	ACAGAGGACAGTGGAGTGTGAGC#GTTTATTTTATTCCACTGTCCTCC#...((((((((((((((((((((#))))))...)))))))))))))).	3177	3201	1	-28.1	0	0.242364	0.691	0.452096	1.64595	-6.51454	20	24	14	3UTR		0	0
hsa-miR-6878-3p	NM_001032280	TFAP2A	CTGGCCTCTTCTTTCTCCTAG#CTAAGAGAACAGAACAGGCCGT#.((((((.(((((((((.(((#))).))))).)))).)))))).	2353	2375	1	-20.3	1	0.0132599	0.471	4.94077	5.6149	-6.10696	18	22	6	3UTR		0	0
hsa-miR-6887-5p	NM_001032280	TFAP2A	TGGGGGGACAGATGGAGAGGACA#TTCCACTGTCCTCCCT#.((((((((((.(((((......#))))))))))))))).	3187	3203	1	-26.5	1	0.263317	0.721	0.384039	1.40571	-7.14013	15	16	15	3UTR		0	0
hsa-miR-7154-3p	NM_001032280	TFAP2A	AGGAGGACAAGTTGTGGGAT#ATTCCACTGTCCTCCC#.((((((((....(((((((#))))))))))))))).	3186	3202	1	-21.6	1	0.238219	0.706	0.579703	1.4441	-12.4965	15	16	15	3UTR		0	0
hsa-miR-7844-5p	NM_001032280	TFAP2A	AAAACTAGGACTGTGTGGTGTA#GCCATATTGGAAGCAGTTCTAGTTG#..(((((((((((((((((...#))))).......)))))))))))).	3345	3370	1	-20.7	1	0.000366169	0.588	1.16587	1.828	-4.957	17	25	12	3UTR		0	0
hsa-miR-8056	NM_001032280	TFAP2A	CGTGGATTGTCTGGATGCAT#CATTTAGATATTCCACT#.(((((.((((((((((...#)))))))))).))))).	3661	3678	1	-19.4	0	0.0171048	0.618	4.85595	4.15521	-5.33701	15	17	10	3UTR		0	0
hsa-miR-8085	NM_001032280	TFAP2A	TGGGAGAGAGGACTGTGAGGC#GCCTGTCAATGTATCATAGTCCTTTGTTGCCCAG#((((..(((((((((((((((#)))..........))))))))))))....)))).	3404	3438	1	-25	0	0.0207953	0.647	3.57808	3.1122	-9.95757	19	34	12	3UTR		0	1
hsa-miR-9500	NM_001032280	TFAP2A	AAGGGAAGATGGTGACCAC#TGCGCTTCATGGGACTGAGTCACCACCTTCCCTTA#((((((((.(((((((((.#.)).))))))).)))))))).	2513	2548	1	-26	1	0.299606	0.559	4.19907	3.86625	-4.99396	17	21	8	3UTR		0	1
hsa-miR-181a-2-3p	NM_001042425	TFAP2A	ACCACTGACCGTTGACTGTACC#GGACTGCCCTCTCGACTGTCAGTGGG#.((((((((.(((((.......#.))))).)))))))).	1675	1701	1	-20.9	1	0.000146723	0.294	-0.0161916	0.906061	-5.26888	13	16	8	3UTR		0	1
hsa-miR-182-5p	NM_001042425	TFAP2A	TTTGGCAATGGTAGAACTCACACT#GGCCGTGAAGCCAGCAGAGAAAAGTTCTGCCAAGTTTGTGAAC#.((.((((((((((((((......#.))))))))))...)))).)).	1789	1832	1	-17.8	0	0.00179372	0.647	5.08475	5.6672	-6.82535	16	22	10	3UTR		0	0
hsa-miR-187-5p	NM_001042425	TFAP2A	GGCTACAACACAGGACCCGGGC#TCTGGGATTCATGAATTTAGCCCTGTTGTAGCA#.((((((((((((((((((((.#)))))).))).))..........))))))))).	2379	2412	1	-21.4	1	0.00846872	0.618	5.31923	4.5904	-3.79332	20	33	9	3UTR	MIRT574408	0	1
hsa-miR-212-5p	NM_001042425	TFAP2A	ACCTTGGCTCTAGACTGCTTACT#GGAGTTCAGAGCAGGGTA#(((((.(((((.((((.(.....#).)))).)))))))))).	3062	3080	1	-18.9	0	0.00610176	0.662	1.54503	2.61188	-9.18534	15	18	10	3UTR		0	0
hsa-miR-141-3p	NM_001042425	TFAP2A	TAACACTGTCTGGTAAAGATGG#CTGTCTTTACCCAGGCGT#......((((((((((((((((#))))))))))).))))).	2907	2925	1	-18.3	0	0.000955899	0.662	4.94109	5.06849	-15.5666	16	18	11	3UTR		1	0
hsa-miR-146a-5p	NM_001042425	TFAP2A	TGAGAACTGAATTCCATGGGTT#GGCCATATTGGAAGCAGTTCTA#..(((((((..(((((..((((#))))....))))).))))))).	2764	2786	1	-18.4	1	0.000750323	0.603	5.51078	5.08329	-9.02428	16	22	7	3UTR		0	0
hsa-miR-150-5p	NM_001042425	TFAP2A	TCTCCCAACCCTTGTACCAGTG#TATTGTCTTTAAACCAAGGGTTAGGGAA#..((((((((((((........#.)))))))).)))).	2651	2679	1	-19.5	1	0.000168099	0.618	3.98418	4.25159	-5.9255	12	15	8	3UTR		0	0
hsa-miR-331-5p	NM_001042425	TFAP2A	CTAGGTATGGTCCCAGGGATCC#TTTGGGACCACCTGGT#((((((..(((((((((.....#))))))))))))))).	2732	2748	1	-21.9	0	0.00118893	0.618	3.69901	4.87006	-7.7949	15	16	15	3UTR		0	0
hsa-miR-486-5p	NM_001042425	TFAP2A	TCCTGTACTGAGCTGCCCCGAG#CTTGGAGTTCAGAGCAGGGT#((((((.(((((((...(((((#)))))))))))).)))))).	3059	3079	1	-22.1	0	0.00191283	0.662	1.25571	2.81774	-6.44976	18	20	12	3UTR		0	0
hsa-miR-491-5p	NM_001042425	TFAP2A	AGTGGGGAACCCTTCCATGAGG#CTTCATGGGACTGAGTCACCACC#.((((.((....((((((((((#)))))))))).....)).)))).	1937	1960	1	-19.3	0	0.000141288	0.618	6.18977	5.90485	-14.1648	16	23	10	3UTR		0	0
hsa-miR-146b-5p	NM_001042425	TFAP2A	TGAGAACTGAATTCCATAGGCTG#GGCCATATTGGAAGCAGTTCTA#..(((((((..(((((((((((.#)))).))).)))).))))))).	2764	2786	1	-21	1	0.000750323	0.603	5.64879	4.83101	-9.02428	18	22	7	3UTR		0	0
hsa-miR-503-5p	NM_001042425	TFAP2A	TAGCAGCGGGAACAGTTCTGCAG#GCGGGTGACAGCTCCGGGATCAGCAACCCTTCCTGCTGCTGC#((((((((((((..((((((...#.))).)))..)))))))))))).	1571	1613	1	-24.8	1	0.000704564	0.309	0.055825	0.542831	-6.08354	18	23	12	3UTR	MIRT466431	0	0
hsa-miR-625-5p	NM_001042425	TFAP2A	AGGGGGAAAGTTCTATAGTCC#GGAATTTTCCTCTC#.(((((((((((((.......#))))))))))))).	2675	2689	1	-16.9	1	0.000174378	0.603	4.30938	4.09305	-4.76182	13	14	13	3UTR		0	0
hsa-miR-647	NM_001042425	TFAP2A	GTGGCTGCACTCACTTCCTTC#AGTGGGGCAGCCTCT#(.((((((.((((((......#)))))))))))).).	1695	1710	1	-20.6	1	5.50333e-10	0.309	0.280874	1.36111	-6.39069	13	15	12	3UTR		0	0
hsa-miR-654-3p	NM_001042425	TFAP2A	TATGTCTGCTGACCATCACCTT#AAGGTGACAAACAGCTGGACAA#..(((((((((....(((((((#)))))))....)))).))))).	2417	2439	1	-19.7	1	0.0128337	0.721	3.78175	4.3923	-11.1852	16	22	7	3UTR		0	0
hsa-miR-671-3p	NM_001042425	TFAP2A	TCCGGTTCTCAGGGCTCCACC#GTGGAGCCTAAGAGAACAGAA#((..((((((.(((((((((.#)))))))))..)))))).)).	1766	1787	1	-26.2	0	0.0466732	0.456	3.83365	3.8416	-11.3519	17	21	9	3UTR		0	0
hsa-miR-550a-3-5p	NM_001042425	TFAP2A	AGTGCCTGAGGGAGTAAGAG#CTCCCTTGGCAA#..((((.(((((((......#))))))))))).	2982	2994	1	-17.7	0	0.0256903	0.574	3.56718	4.45276	-7.46919	11	12	11	3UTR		0	0
hsa-miR-936	NM_001042425	TFAP2A	ACAGTAGAGGGAGGAATCGCAG#CCTTCCTGCTGCTGC#.(((((((((((((........#))))))).)))))).	1598	1613	1	-20.1	1	0.000704564	0.309	0.790129	0.6306	-4.76182	13	15	7	3UTR		0	0
hsa-miR-1257	NM_001042425	TFAP2A	AGTGAATGATGGGTTCTGACC#GAACCCATTGTTTC#...(((((((((((((.....#))))))))))))).	3016	3030	1	-17	0	0.0593631	0.647	4.37143	3.36733	-6.51454	13	14	13	3UTR		0	0
hsa-miR-1263	NM_001042425	TFAP2A	ATGGTACCCTGGCATACTGAGT#ACTTGGAGTTCAGAGCAGGGTATCATT#((((((((((.((...(((((.#.))))).)))))))))))).	3058	3085	1	-20.5	1	0.0113156	0.618	1.70081	2.68838	-8.58769	17	20	12	3UTR		0	0
hsa-miR-3117-3p	NM_001042425	TFAP2A	ATAGGACTCATATAGTGCCAG#GCATTGTATTGAGTTGTGC#.((.((((((((((((((...#))))))))).))))).)).	2789	2808	1	-17.1	0	0.0137711	0.588	5.40668	5.52105	-6.82535	16	19	9	3UTR		0	0
hsa-miR-3129-5p	NM_001042425	TFAP2A	GCAGTAGTGTAGAGATTGGTTT#GCTGCTGCTACTGCTGCTGCTGCT#((((((((((((((........#.)).)))).)))))))).	1605	1629	1	-18.4	1	0.000221519	0.279	0.449661	0.653555	-4.90607	14	18	8	3UTR		0	0
hsa-miR-3154	NM_001042425	TFAP2A	CAGAAGGGGAGTTGGGAGCAGA#TCTCTCTCCTCTCTCTTTCTGT#(((((((((((..(((((.(((#))))))))..))))))))))).	2693	2715	1	-25.3	1	0.0885193	0.574	4.40766	4.19091	-8.57351	19	22	11	3UTR		0	1
hsa-miR-3162-5p	NM_001042425	TFAP2A	TTAGGGAGTAGAAGGGTGGGGAG#CTCCCCACCCGCTCCCA#...((((((....((((((((((#)))))))))))))))).	1732	1749	1	-32.2	0	0.163231	0.309	1.42592	2.70871	-15.2178	16	17	16	3UTR		0	0
hsa-miR-3194-3p	NM_001042425	TFAP2A	AGCTCTGCTGCTCACTGGCAGT#ACTGTCAGTGGGGCAGCC#......((((((((((((((((#)))))))))))).)))).	1689	1707	1	-25.9	0	1.21622e-09	0.309	0.814638	1.71219	-15.5666	16	18	12	3UTR		0	0
hsa-miR-2355-5p	NM_001042425	TFAP2A	ATCCCCAGATACAATGGACAA#GTTCATGGTACTGATTTAGAAATCCAGTGTTTGGGGG#..((((((((((..((((...#.)))))))))))))).	2333	2370	1	-20.5	1	0.000494522	0.632	4.55049	5.41688	-7.10297	14	16	14	3UTR		0	0
hsa-miR-4270	NM_001042425	TFAP2A	TCAGGGAGTCAGGGGAGGGC#CTCTCCCTTGGCAATTGCTCCTTGC#.((((((((((((((((((.#))))))))))......)))))))).	2980	3005	1	-26.5	1	0.000328146	0.559	4.4047	4.18791	-3.79332	18	25	10	3UTR		0	0
hsa-miR-4435	NM_001042425	TFAP2A	ATGGCCAGAGCTCACACAGAGG#CCTCCCCACCCGCTCCCACACCCCTGTGCCCTCATGTGGAGCCTAAGAGAACAGAACAGGCCGTG#((((((((.((((.((((((((#.)))).))))))))))..............)))))).	1731	1796	1	-24.9	1	0.0116393	0.485	0.724971	2.6952	-5.8508	20	37	10	3UTR		0	1
hsa-miR-4467	NM_001042425	TFAP2A	TGGCGGCGGTAGTTATGGGCTT#CCCTTCCTGCTGCTGCTACTGCTGCTGCTGCTGCCGCCGCCG#.((((((((((((....(((..#.)))...)))))))))))).	1597	1639	1	-31.2	1	1.88997e-06	0.25	0.613947	0.648154	-5.61866	15	20	12	3UTR	MIRT744908	0	1
hsa-miR-4468	NM_001042425	TFAP2A	AGAGCAGAAGGATGAGAT#TCTCTCTTTCTGTTCA#.(((((((((((.((((.#))))))))))))))).	2702	2718	1	-20.8	1	0.0575384	0.559	3.80519	4.22466	-5.08246	15	16	15	3UTR		0	0
hsa-miR-4470	NM_001042425	TFAP2A	TGGCAAACGTGGAAGCCGAGA#GTTTCCATGCCTGTCAA#(((((..(((((((((.....#)))))))))..))))).	2816	2833	1	-18.1	0	0.0070655	0.574	6.44289	5.77055	-7.38222	14	17	9	3UTR		0	0
hsa-miR-4476	NM_001042425	TFAP2A	CAGGAAGGATTTAGGGACAGGC#GCCTGTCAATGTATCATAGTCCTT#.((((..(((.((..(((((((#)))))))..)).)))....)))).	2824	2848	1	-20.1	0	0.0728031	0.632	5.57723	5.8316	-11.655	16	24	7	3UTR	MIRT466428	0	0
hsa-miR-4524a-3p	NM_001042425	TFAP2A	TGAGACAGGCTTATGCTGCTAT#TGGCAGTAGTTTCCATGCCTGTCA#...(((((((...((((((((.#))))))))........))))))).	2808	2832	1	-22.5	0	0.0057039	0.574	4.57429	5.67462	-13.9752	15	24	8	3UTR		0	0
hsa-miR-3976	NM_001042425	TFAP2A	TATAGAGAGCAGGAAGATTAATGT#GGGTTAGGGAATTTTCCTCTCTCTC#...((((((.(((((((((.....#.))))))))))))))).	2668	2693	1	-18.8	0	0.0335114	0.588	3.41971	4.28444	-7.75705	15	17	15	3UTR		0	0
hsa-miR-3976	NM_001042425	TFAP2A	TATAGAGAGCAGGAAGATTAATGT#GCAACCCTTCCTGCTGCTGCTAC#..((((((((((((((........#.))))))))).)).))).	1593	1616	1	-18.6	1	0.000960894	0.294	0.463165	0.631951	-4.957	14	18	9	3UTR		0	0
hsa-miR-4640-5p	NM_001042425	TFAP2A	TGGGCCAGGGAGCAGCTGGTGGG#CCCACCCGCTCCCACACCCCTGTGCCCT#.(((((((((.(.(((.((((((#)))))).))).).....))))).)))).	1735	1763	1	-31	1	0.00413056	0.353	5.12033	2.81673	-7.90723	19	28	6	3UTR		0	0
hsa-miR-4644	NM_001042425	TFAP2A	TGGAGAGAGAAAAGAGACAGAAG#TTGTCTTTAAACCAAGGGTTAGGGAATTTTCCTCTCTCTCTCTCTCTCCT#.(((((((((..(((((..((((#.)))).)))))...))))))))).	2653	2703	1	-21.9	1	0.117582	0.574	3.33084	4.2473	-9.9649	18	24	9	3UTR		0	0
hsa-miR-4649-5p	NM_001042425	TFAP2A	TGGGCGAGGGGTGGGCTCTCAGAG#CTCACCAGCCCCCCGCGCGCCCAC#((((((.((((.(((((....(((#)))...)))))))).).)))))).	1541	1565	1	-29.3	0	0.00212632	0.206	-0.00718887	0.44291	-8.82806	18	24	8	3UTR		0	0
hsa-miR-4667-5p	NM_001042425	TFAP2A	ACTGGGGAGCAGAAGGAGAACC#TCTCTTTCTGTTCAAAGAACTTCAAACATTTGGGACCACCTGGTA#(((((((((((((((((((...#))))))))))))).........................)))))).	2704	2749	1	-22.5	1	0.00117245	0.603	4.17134	4.76754	-3.93757	19	45	13	3UTR		0	0
hsa-miR-4667-5p	NM_001042425	TFAP2A	ACTGGGGAGCAGAAGGAGAACC#TCTCCGACTCTGCACCCGCCTCGACCTCCCCAC#..(((((((((((.(((((...#)))))...))))).............)))))).	1707	1740	1	-22.3	1	0.146287	0.294	0.541931	2.80323	-5.81384	16	33	6	3UTR		0	0
hsa-miR-219b-5p	NM_001042425	TFAP2A	AGATGTCCAGCCACAATTCTCG#GAGTTGTGCTGGCAG#...((.((((.((((((((...#)))))))))))))).	2799	2814	1	-17.9	0	0.000118578	0.588	4.74871	5.66543	-11.2403	14	15	14	3UTR		0	0
hsa-miR-4686	NM_001042425	TFAP2A	TATCTGCTGGGCTTTCTGGTGTT#AGGCCGTGAAGCCAGCAGAG#..((((((.((((((.((((.(.#).)))).)))))))))))).	1788	1808	1	-23.2	1	0.00169411	0.515	4.79986	5.4282	-6.24644	17	20	12	3UTR		0	0
hsa-miR-203b-5p	NM_001042425	TFAP2A	TAGTGGTCCTAAACATTTCACA#TTTGGGACCACC#..(((((((((((.........#))))))))))).	2732	2744	1	-17.3	1	0.00768303	0.618	3.57667	4.84024	-6.78234	11	12	11	3UTR		0	0
hsa-miR-4712-5p	NM_001042425	TFAP2A	TCCAGTACAGGTCTCTCATTTC#TGTATTGAGTTGTGCTGGC#.(((((((((.((.........#.)).))))))))).	2793	2812	1	-16.6	1	0.000204955	0.574	5.02165	5.7012	-8.44344	11	14	9	3UTR		0	0
hsa-miR-4723-5p	NM_001042425	TFAP2A	TGGGGGAGCCATGAGATAAGAGCA#CTCTTGTTTAGTGGGTTTTGAATCTTCCCTAT#((((((((((((.(((((((((..#))))))))).)))).........)))))))).	2287	2319	1	-22.9	1	0.0172216	0.632	4.74197	5.53958	-5.22671	21	32	9	3UTR		0	0
hsa-miR-4790-5p	NM_001042425	TFAP2A	ATCGCTTTACCATTCATGTT#GGTAAAGCGAC#.((((((((((.........#)))))))))).	2119	2130	1	-16.6	1	0.00117525	0.618	5.93905	6.09342	-10.2546	10	11	10	3UTR		0	0
hsa-miR-4794	NM_001042425	TFAP2A	TCTGGCTATCTCACGAGACTGT#ACAGGCCGTGAAGCCAGC#.((((((...(((((.(.((((#)))).)))))))))))).	1786	1804	1	-19.2	1	0.000690223	0.5	4.96189	5.4201	-8.6389	16	18	12	3UTR		0	0
hsa-miR-4799-3p	NM_001042425	TFAP2A	ACTGGCATGCTGCATTTATATA#TGTAGCATGTTAA#..((((((((((((........#)))))))))))).	2405	2418	1	-16.9	1	0.00129331	0.632	5.59519	4.69832	-5.9255	12	13	12	3UTR		0	0
hsa-miR-5189-5p	NM_001042425	TFAP2A	TCTGGGCACAGGCGGATGGACAGG#CCTGTCAATGTATCATAGTCCTTTGTTGCCCAGAT#((((((((((((.((((.((((((#))))))...........))))))))).))))))).	2825	2860	1	-27.4	1	0.0173758	0.647	5.81874	5.64264	-5.22671	22	35	9	3UTR		0	1
hsa-miR-5192	NM_001042425	TFAP2A	AGGAGAGTGGATTCCAGGTGGT#ACCACCTGGTATTCTGTATTTTCACTGGCCA#.((..((((((..(((((((((#)))))))))...........))))))..)).	2738	2769	1	-24.2	0	0.0147332	0.588	3.67362	5.0099	-15.5803	17	31	9	3UTR		0	0
hsa-miR-5196-5p	NM_001042425	TFAP2A	AGGGAAGGGGACGAGGGTTGGG#CCCGCCCCGCCCCTCCCA#.(((.(((((.((.(((.((((#))))))))))))))))).	1520	1538	1	-29.4	0	0.377947	0.235	0.993829	0.638702	-11.594	17	18	17	3UTR		0	1
hsa-miR-5691	NM_001042425	TFAP2A	TTGCTCTGAGCTCCGAGAAAGC#CTTTCAACTTGGAGTTCAGAGCAGG#(((((((((((((((((.....#.))))))))))))))))).	3052	3077	1	-30.2	1	0.00045201	0.662	1.5699	3.40804	-3.93757	17	19	17	3UTR		0	1
hsa-miR-5705	NM_001042425	TFAP2A	TGTTTCGGGGCTCATGGCCTGTG#GCGGGTGACAGCTCCGGGATC#.(((((((((((..(.((((((.#)))))).).))))))))))).	1571	1592	1	-24.4	1	2.8102e-05	0.294	0.172851	0.557684	-6.17234	18	21	11	3UTR		0	0
hsa-miR-6501-3p	NM_001042425	TFAP2A	CCAGAGCAGCCTGCGGTAACAGT#GCTGTCTTTACCCAGGCGTATTTTTGTTCTTGGC#(((((((((((((.(((((((((#)))))...))))))))).......)))))).)).	2906	2940	1	-23.9	1	0.00940034	0.618	4.64696	4.94348	-4.79441	22	34	9	3UTR		0	0
hsa-miR-6728-3p	NM_001042425	TFAP2A	TCTCTGCTCTGCTCTCCCCAG#GGAGTTCAGAGCAGGGT#.((((((((((..((((....#))))..)))))))))).	3062	3079	1	-24.8	1	0.00191283	0.662	1.72307	2.65222	-8.42926	14	17	10	3UTR		0	0
hsa-miR-6730-5p	NM_001042425	TFAP2A	AGAAAGGTGGAGGGGTTGTCAGA#TTTGATAACCCTTCTATGTA#....(.(((((((((((((((((#))))))))))))))))).).	2557	2577	1	-24.7	0	0.0353973	0.721	4.5749	4.8485	-11.4475	18	20	17	3UTR		0	0
hsa-miR-6734-5p	NM_001042425	TFAP2A	TTGAGGGGAGAATGAGGTGGAGA#TCTCTCTCTCTCTCTCCTCTCT#..(((((((((..((((.(((((#))))).))))..))))))))).	2685	2707	1	-27	1	0.115112	0.588	4.43536	3.94023	-9.59293	18	22	9	3UTR		0	1
hsa-miR-6740-3p	NM_001042425	TFAP2A	TGTCTTCTCTCCTCCCAAACAG#TGTTTGGGGGATTTTTTTCTCTGGGAT#.....(((((((.((((((((.#)))))))))))...........)))).	2360	2387	1	-17	0	0.00312072	0.618	5.23053	5.41384	-14.9547	15	27	11	3UTR		0	0
hsa-miR-6750-5p	NM_001042425	TFAP2A	CAGGGAACAGCTGGGTGAGCTGCT#AGCAGCTGAACCCATTGTTTCCCTC#.(((((((((.(((((.(((((((#)))))))..)))))))))).)))).	3009	3034	1	-29.7	1	0.0865037	0.632	5.42854	3.1973	-6.6181	21	25	10	3UTR		0	0
hsa-miR-6761-3p	NM_001042425	TFAP2A	TCCTACGCTGCTCTCTCACTCC#GGAGTTCAGAGCAGGGTAT#...(((.(((((((...(((((#)))))..))))))).))).	3062	3081	1	-22.1	0	0.00656821	0.647	1.89157	2.59936	-9.02673	15	19	7	3UTR		0	0
hsa-miR-6769a-3p	NM_001042425	TFAP2A	GAGCCCCTCTCTGCTCTCCAG#TTGGAGTTCAGAGCAGGGTATCA#((..(((((((((..((((((#))))))..))))).))))..)).	3060	3083	1	-24.5	0	0.0125867	0.632	1.72307	2.65222	-10.1194	17	23	6	3UTR		0	0
hsa-miR-6775-5p	NM_001042425	TFAP2A	TCGGGGCATGGGGGAGGGAGGCTGG#CCACCCGCTCCCACACCCCTGTGCCCTC#..((((((((((((.(((((..(((#)))....)))))...)))))))))))).	1736	1764	1	-34.6	1	0.0052905	0.353	5.17795	2.74651	-5.69245	20	28	12	3UTR		0	0
hsa-miR-6785-5p	NM_001042425	TFAP2A	TGGGAGGGCGTGGATGATGGTG#CGCCCCGCCCCTCCCAC#((((((((.((((.....((((#)))))))))))))))).	1522	1539	1	-25.6	1	0.328793	0.25	0.523926	0.507724	-6.8193	16	17	16	3UTR		0	0
hsa-miR-6785-5p	NM_001042425	TFAP2A	TGGGAGGGCGTGGATGATGGTG#TCCACTGTCCTCCCT#.(((((((((((((........#))))).)))))))).	2608	2623	1	-24.2	1	0.263317	0.721	3.69538	4.31873	-4.76182	13	15	8	3UTR		0	0
hsa-miR-6793-5p	NM_001042425	TFAP2A	TGTGGGTTCTGGGTTGGGGTGA#CGCCTCGACCTCCCCACCCGCT#.((((((...(((((((((((.#)))))))))))....)))))).	1723	1745	1	-27.9	1	0.0220048	0.294	0.624585	2.9018	-8.40586	17	22	11	3UTR		0	0
hsa-miR-6798-5p	NM_001042425	TFAP2A	CCAGGGGGATGGGCGAGCTTGGG#CCCCCGCGCGCCCACCCTCCGGC#((.(((((.((((((.((..(((#)))..)).))))))))))).)).	1550	1573	1	-30.9	0	1.88444e-05	0.25	-0.00718887	0.44291	-6.78455	18	23	11	3UTR		0	0
hsa-miR-6802-5p	NM_001042425	TFAP2A	CTAGGTGGGGGGCTTGAAGC#GCCTCACCAGCCCCCCGCG#....(((((((((((((.((#)).)))..)))))))))).	1539	1558	1	-26.3	0	0.0103828	0.176	0.396099	0.459113	-9.54656	15	19	10	3UTR		0	0
hsa-miR-6806-3p	NM_001042425	TFAP2A	TGAAGCTCTGACATTCCTGCAG#GGAGTTCAGAGCA#....(((((((.(((((.....#)))))))))))).	3062	3075	1	-17.9	0	0.00957987	0.662	1.58954	2.69534	-12.8934	12	13	12	3UTR		0	0
hsa-miR-6810-5p	NM_001042425	TFAP2A	ATGGGGACAGGGATCAGCATGGC#GCTGCTGCTGCCGCCGCCGCCGCCGCCGCTGCCCTTGGGTCCCCC#..((((((((((..((((.((((#.))))..))))))))...)))))).	1620	1665	1	-26.4	1	0.000144665	0.221	1.55223	0.645454	-7.10297	18	25	8	3UTR		0	0
hsa-miR-6818-5p	NM_001042425	TFAP2A	TTGTGTGAGTACAGAGAGCATC#GATATTCCACTGTGTCTGTATTCAGACAAA#((((.((((((((((..(((..#.))).)))))))))).)))).	3087	3117	1	-21	0	0.000164064	0.706	1.14443	2.39211	-8.28966	17	21	10	3UTR		0	0
hsa-miR-6826-5p	NM_001042425	TFAP2A	TCAATAGGAAAGAGGTGGGACCT#GGGACCACCTGGTATTCTGTATTTTCACTGGCCATATTGGA#((((((((..((((((((..((.#))..)))))).................))..)).)))))).	2735	2776	1	-21.2	1	0.00215835	0.588	4.5509	4.87734	-6.23647	18	41	6	3UTR		0	0
hsa-miR-6833-5p	NM_001042425	TFAP2A	GTGTGGAAGATGGGAGGAGAAA#TCTCCTCTCTCTTTCT#....((((((.(((((((((..#))))))))))))))).	2697	2713	1	-22.2	0	0.152812	0.574	4.43536	3.94023	-12.3713	15	16	15	3UTR		0	0
hsa-miR-6838-5p	NM_001042425	TFAP2A	AAGCAGCAGTGGCAAGACTCCT#GGGATCAGCAACCCTTCCTGCTGCTGCTACTGCTGCTG#.(((((((((((((........#.))))))))))))).	1586	1624	1	-25.1	1	3.42387e-05	0.265	0.139612	0.608996	-4.76182	13	15	13	3UTR	MIRT466430	0	1
hsa-miR-6846-5p	NM_001042425	TFAP2A	TGGGGGCTGGATGGGGTAGAGT#CTCCCACGCCTCACCAGCCCCCC#.(((((((((.((((((.(((.#)))....))))))))))))))).	1532	1555	1	-31.3	1	0.0701821	0.191	0.544932	0.422655	-6.6181	18	23	15	3UTR		0	0
hsa-miR-6855-5p	NM_001042425	TFAP2A	TTGGGGTTTGGGGTGCAGACATTGC#TCTGCACCCGCCTCGAC#(((((((...(((((((((......#)))))))))))))))).	1715	1732	1	-25.2	1	0.0391004	0.279	0.30488	2.53047	-8.55011	16	17	16	3UTR		0	0
hsa-miR-6858-5p	NM_001042425	TFAP2A	GTGAGGAGGGGCTGGCAGGGAC#CCTCACCAGCCCCCCGCGCG#(((.((.((((((((..(((..#)))..)))))))))).))).	1540	1560	1	-29.8	0	0.00293128	0.162	0.604945	0.406452	-8.74633	16	20	10	3UTR		0	0
hsa-miR-6869-5p	NM_001042425	TFAP2A	GTGAGTAGTGGCGCGCGGCGGC#GCCGCCGCCGCCGCTGCC#....(((((((((.((((((((#))))))))))))))))).	1635	1653	1	-36.6	0	0.000404034	0.221	0.688962	0.591442	-10.4034	17	18	17	3UTR		0	0
hsa-miR-6871-5p	NM_001042425	TFAP2A	CATGGGAGTTCGGGGTGGTTGC#CAGCCCCCCGCGCGCCCAC#..((((.((.(((((.(((((.#)))))))))).)).)))).	1546	1565	1	-26.8	0	0.00212632	0.206	0.604946	0.395649	-7.97624	16	19	10	3UTR		0	0
hsa-miR-6875-3p	NM_001042425	TFAP2A	ATTCTTCCTGCCCTGGCTCCAT#TGGAGTTCAGAGCAGGGT#.....((((((.(((((((((.#)))))).))).)))))).	3061	3079	1	-22.5	0	0.00191283	0.662	1.12218	3.02082	-17.0124	15	18	6	3UTR		0	0
hsa-miR-6878-3p	NM_001042425	TFAP2A	CTGGCCTCTTCTTTCTCCTAG#CTAAGAGAACAGAACAGGCCGT#.((((((.(((((((((.(((#))).))))).)))).)))))).	1773	1795	1	-20.3	1	0.0132599	0.471	3.86726	4.79491	-6.10696	18	22	6	3UTR		0	0
hsa-miR-7110-5p	NM_001042425	TFAP2A	TGGGGGTGTGGGGAGAGAGAG#CTCGACCTCCCCACCCGCTCCCAC#(((((((((((((((...(((#)))...))))))))..))))))).	1726	1750	1	-29.6	1	0.13357	0.324	3.14668	2.73301	-4.17062	18	24	8	3UTR		0	0
hsa-miR-4433b-3p	NM_001042425	TFAP2A	CAGGAGTGGGGGGTGGGACGT#GCGCCCACCCTCCGGCGGGTGACAGCTCCG#..(((((((((((((((.(((#)))))))))))))...........))))).	1557	1587	1	-30.5	1	1.46102e-06	0.265	0.276719	0.542831	-4.957	18	30	13	3UTR		0	0
hsa-miR-1273h-5p	NM_001042425	TFAP2A	CTGGGAGGTCAAGGCTGCAGT#GCAGCCTCTCCGACTCTGCACCCGCCTCGACCTCCCC#..((((((((.(((((((((.#.)))))...)))).)))))))).	1701	1738	1	-30	1	0.0869926	0.279	1.09105	2.13078	-7.78178	17	23	8	3UTR		0	0
hsa-miR-8056	NM_001042425	TFAP2A	CGTGGATTGTCTGGATGCAT#TGTATTCAGACAAATGACACA#.(((..(((((((((((((.#)))))))))))))....))).	3103	3124	1	-20.2	0	0.0188905	0.691	1.47826	2.79966	-9.81332	16	21	13	3UTR		0	0
hsa-miR-10398-3p	NM_001042425	TFAP2A	GCCCGGAGAGCTGGGAGCCAG#TTGGGTCCCCCCGAGTCTCCGGGA#.((((((((.((((((.((((#)))).))))....)))))))))).	1654	1678	1	-28.7	1	6.47118e-07	0.25	1.57716	0.803438	-5.03583	18	24	10	3UTR		0	1
hsa-miR-10400-3p	NM_001042425	TFAP2A	CTGGGCTCCCGGACGAGGCGGG#CCGCCGCCGCTGCCCTTGGGTCCCCCCGAGTCTCCGGGACTGCCCT#..(((((((((((.((..((((#.))))..)))))))))..)))).	1639	1685	1	-30.6	1	0.000157427	0.294	1.0869	0.739974	-5.81384	17	23	9	3UTR		0	0

## Sheet: mirDIP
Links	Gene Symbol	Uniprot	Pseudogene	microRNA	Integrated Score	Number of Sources	Score Class
GC UP	TFAP2A	P05549		hsa-miR-200c-3p	0.877994	16	Very High
GC UP	TFAP2A	P05549		hsa-miR-429	0.870805	15	Very High
GC UP	TFAP2A	P05549		hsa-miR-200b-3p	0.870015	16	Very High
GC UP	TFAP2A	P05549		hsa-miR-137-3p	0.849781	13	Very High
GC UP	TFAP2A	P05549		hsa-miR-141-3p	0.805614	14	Very High
GC UP	TFAP2A	P05549		hsa-miR-577	0.803507	14	Very High
GC UP	TFAP2A	P05549		hsa-miR-876-5p	0.757408	13	Very High
GC UP	TFAP2A	P05549		hsa-miR-383-5p	0.755516	16	Very High
GC UP	TFAP2A	P05549		hsa-miR-222-3p	0.735141	12	Very High
GC UP	TFAP2A	P05549		hsa-miR-221-3p	0.729351	12	Very High
GC UP	TFAP2A	P05549		hsa-miR-1285-3p	0.714296	14	Very High
GC UP	TFAP2A	P05549		hsa-miR-612	0.697049	14	Very High
GC UP	TFAP2A	P05549		hsa-miR-187-5p	0.668734	12	Very High
GC UP	TFAP2A	P05549		hsa-miR-4427	0.662809	9	Very High
GC UP	TFAP2A	P05549		hsa-miR-592	0.657604	12	Very High
GC UP	TFAP2A	P05549		hsa-miR-661	0.650832	14	Very High
GC UP	TFAP2A	P05549		hsa-miR-664a-3p	0.646393	12	Very High
GC UP	TFAP2A	P05549		hsa-miR-33a-3p	0.645252	11	Very High
GC UP	TFAP2A	P05549		hsa-miR-599	0.641482	10	Very High
GC UP	TFAP2A	P05549		hsa-miR-3938	0.639463	11	Very High
GC UP	TFAP2A	P05549		hsa-miR-4539	0.626387	11	Very High
GC UP	TFAP2A	P05549		hsa-miR-323a-5p	0.60829	14	Very High
GC UP	TFAP2A	P05549		hsa-miR-573	0.587934	12	Very High
GC UP	TFAP2A	P05549		hsa-miR-628-3p	0.583129	11	Very High
GC UP	TFAP2A	P05549		hsa-miR-3919	0.582831	13	Very High
GC UP	TFAP2A	P05549		hsa-miR-583	0.571257	11	Very High
GC UP	TFAP2A	P05549		hsa-miR-26b-3p	0.563084	12	Very High
GC UP	TFAP2A	P05549		hsa-miR-1321	0.552754	13	Very High
GC UP	TFAP2A	P05549		hsa-miR-466	0.552472	8	Very High
GC UP	TFAP2A	P05549		hsa-miR-4789-3p	0.544037	8	Very High
GC UP	TFAP2A	P05549		hsa-miR-4747-5p	0.530796	13	Very High
GC UP	TFAP2A	P05549		hsa-miR-3916	0.527045	12	Very High
GC UP	TFAP2A	P05549		hsa-miR-5189-5p	0.515019	11	Very High
GC UP	TFAP2A	P05549		hsa-miR-124-5p	0.510689	9	Very High
GC UP	TFAP2A	P05549		hsa-miR-16-2-3p	0.509053	10	Very High
GC UP	TFAP2A	P05549		hsa-miR-361-3p	0.508497	10	Very High
GC UP	TFAP2A	P05549		hsa-miR-196a-3p	0.508284	9	Very High
GC UP	TFAP2A	P05549		hsa-miR-5196-5p	0.504668	12	Very High
GC UP	TFAP2A	P05549		hsa-miR-3187-5p	0.50392	11	Very High
GC UP	TFAP2A	P05549		hsa-miR-1322	0.486694	8	Very High
GC UP	TFAP2A	P05549		hsa-miR-606	0.484228	7	Very High
GC UP	TFAP2A	P05549		hsa-miR-4301	0.483666	8	Very High
GC UP	TFAP2A	P05549		hsa-miR-2115-5p	0.482969	7	Very High
GC UP	TFAP2A	P05549		hsa-miR-664b-5p	0.473321	11	Very High
GC UP	TFAP2A	P05549		hsa-miR-921	0.46432	9	Very High
GC UP	TFAP2A	P05549		hsa-miR-518d-3p	0.454819	10	Very High
GC UP	TFAP2A	P05549		hsa-miR-2054	0.450759	10	Very High
GC UP	TFAP2A	P05549		hsa-miR-5010-3p	0.445503	9	Very High
GC UP	TFAP2A	P05549		hsa-miR-181a-2-3p	0.442048	10	Very High
GC UP	TFAP2A	P05549		hsa-miR-518a-3p	0.439559	9	Very High
GC UP	TFAP2A	P05549		hsa-miR-4252	0.437427	9	Very High
GC UP	TFAP2A	P05549		hsa-miR-4511	0.435394	9	Very High
GC UP	TFAP2A	P05549		hsa-miR-5192	0.43423	10	Very High
GC UP	TFAP2A	P05549		hsa-miR-2117	0.418413	10	Very High
GC UP	TFAP2A	P05549		hsa-miR-4435	0.414684	8	Very High
GC UP	TFAP2A	P05549		hsa-miR-5580-5p	0.404283	9	Very High
GC UP	TFAP2A	P05549		hsa-miR-1243	0.398229	7	Very High
GC UP	TFAP2A	P05549		hsa-miR-518b	0.395329	9	Very High
GC UP	TFAP2A	P05549		hsa-miR-2355-3p	0.394403	9	Very High
GC UP	TFAP2A	P05549		hsa-miR-4275	0.393512	7	Very High
GC UP	TFAP2A	P05549		hsa-miR-378c	0.393337	8	Very High
GC UP	TFAP2A	P05549		hsa-miR-518c-3p	0.381476	9	Very High
GC UP	TFAP2A	P05549		hsa-miR-518f-3p	0.37947	9	Very High
GC UP	TFAP2A	P05549		hsa-miR-3616-5p	0.377726	7	Very High
GC UP	TFAP2A	P05549		hsa-miR-377-5p	0.366274	10	Very High
GC UP	TFAP2A	P05549		hsa-miR-3167	0.364186	8	Very High
GC UP	TFAP2A	P05549		hsa-miR-3960	0.35435	11	Very High
GC UP	TFAP2A	P05549		hsa-miR-135a-3p	0.351856	10	Very High
GC UP	TFAP2A	P05549		hsa-miR-8060	0.35104	6	Very High
GC UP	TFAP2A	P05549		hsa-miR-4424	0.349981	6	Very High
GC UP	TFAP2A	P05549		hsa-miR-1234-3p	0.343824	8	Very High
GC UP	TFAP2A	P05549		hsa-miR-4759	0.343299	6	Very High
GC UP	TFAP2A	P05549		hsa-miR-4467	0.33809	12	Very High
GC UP	TFAP2A	P05549		hsa-miR-616-3p	0.330496	6	Very High
GC UP	TFAP2A	P05549		hsa-miR-1203	0.321346	10	Very High
GC UP	TFAP2A	P05549		hsa-miR-4506	0.312539	7	Very High
GC UP	TFAP2A	P05549		hsa-miR-6860	0.310385	7	Very High
GC UP	TFAP2A	P05549		hsa-miR-12113	0.306401	3	Very High
GC UP	TFAP2A	P05549		hsa-miR-6505-5p	0.293364	6	Very High
GC UP	TFAP2A	P05549		hsa-miR-6834-5p	0.285895	8	Very High
GC UP	TFAP2A	P05549		hsa-miR-1298-3p	0.279559	7	Very High
GC UP	TFAP2A	P05549		hsa-miR-8072	0.267067	9	Very High
GC UP	TFAP2A	P05549		hsa-miR-6506-3p	0.264469	5	Very High
GC UP	TFAP2A	P05549		hsa-miR-6511a-3p	0.262124	5	Very High
GC UP	TFAP2A	P05549		hsa-miR-6511b-3p	0.2589	5	Very High
GC UP	TFAP2A	P05549		hsa-miR-4281	0.257377	7	Very High
GC UP	TFAP2A	P05549		hsa-miR-3141	0.252904	9	Very High
GC UP	TFAP2A	P05549		hsa-miR-6892-5p	0.249916	8	Very High
GC UP	TFAP2A	P05549		hsa-miR-5091	0.246158	9	Very High
GC UP	TFAP2A	P05549		hsa-miR-6090	0.239245	9	Very High
GC UP	TFAP2A	P05549		hsa-miR-7706	0.238852	6	Very High
GC UP	TFAP2A	P05549		hsa-miR-9500	0.233487	6	Very High
GC UP	TFAP2A	P05549		hsa-miR-4790-5p	0.227107	7	Very High
GC UP	TFAP2A	P05549		hsa-miR-10400-5p	0.222053	7	Very High
GC UP	TFAP2A	P05549		hsa-miR-6861-5p	0.216639	5	Very High
GC UP	TFAP2A	P05549		hsa-miR-718	0.189173	6	Very High
GC UP	TFAP2A	P05549		hsa-miR-3648	0.188908	7	Very High
GC UP	TFAP2A	P05549		hsa-miR-190b-3p	0.160479	2	Very High
GC UP	TFAP2A	P05549		hsa-miR-10398-3p	0.159941	5	Very High
GC UP	TFAP2A	P05549		Hsa-Mir-935-v2_5p*	0.154556	4	Very High
GC UP	TFAP2A	P05549		Hsa-Mir-935-v1_5p*	0.153547	4	Very High
GC UP	TFAP2A	P05549		hsa-miR-10394-3p	0.122181	5	Very High
GC UP	TFAP2A	P05549		Hsa-Mir-154-P20-v1_5p*	0.113842	3	Very High

## Sheet: miRDB
Target Detail	Target Rank	Target Score	miRNA Name	Gene Symbol	Gene Description
Details	1	99	hsa-miR-3163	TFAP2A	transcription factor AP-2 alpha
Details	2	99	hsa-miR-4539	TFAP2A	transcription factor AP-2 alpha
Details	3	99	hsa-miR-12113	TFAP2A	transcription factor AP-2 alpha
Details	4	98	hsa-miR-190b-3p	TFAP2A	transcription factor AP-2 alpha
Details	5	98	hsa-miR-4427	TFAP2A	transcription factor AP-2 alpha
Details	6	98	hsa-miR-200c-3p	TFAP2A	transcription factor AP-2 alpha
Details	7	98	hsa-miR-429	TFAP2A	transcription factor AP-2 alpha
Details	8	98	hsa-miR-200b-3p	TFAP2A	transcription factor AP-2 alpha
Details	9	98	hsa-miR-577	TFAP2A	transcription factor AP-2 alpha
Details	10	97	hsa-miR-15b-5p	TFAP2A	transcription factor AP-2 alpha
Details	11	97	hsa-miR-16-5p	TFAP2A	transcription factor AP-2 alpha
Details	12	97	hsa-miR-15a-5p	TFAP2A	transcription factor AP-2 alpha
Details	13	97	hsa-miR-195-5p	TFAP2A	transcription factor AP-2 alpha
Details	14	96	hsa-miR-7706	TFAP2A	transcription factor AP-2 alpha
Details	15	95	hsa-miR-4755-5p	TFAP2A	transcription factor AP-2 alpha
Details	16	95	hsa-miR-137-3p	TFAP2A	transcription factor AP-2 alpha
Details	17	95	hsa-miR-497-5p	TFAP2A	transcription factor AP-2 alpha
Details	18	95	hsa-miR-6838-5p	TFAP2A	transcription factor AP-2 alpha
Details	19	95	hsa-miR-424-5p	TFAP2A	transcription factor AP-2 alpha
Details	20	95	hsa-miR-5006-3p	TFAP2A	transcription factor AP-2 alpha
Details	21	95	hsa-miR-33a-3p	TFAP2A	transcription factor AP-2 alpha
Details	22	94	hsa-miR-3938	TFAP2A	transcription factor AP-2 alpha
Details	23	93	hsa-miR-2115-5p	TFAP2A	transcription factor AP-2 alpha
Details	24	93	hsa-miR-592	TFAP2A	transcription factor AP-2 alpha
Details	25	93	hsa-miR-5582-3p	TFAP2A	transcription factor AP-2 alpha
Details	26	92	hsa-miR-8084	TFAP2A	transcription factor AP-2 alpha
Details	27	91	hsa-miR-4282	TFAP2A	transcription factor AP-2 alpha
Details	28	91	hsa-miR-5692a	TFAP2A	transcription factor AP-2 alpha
Details	29	91	hsa-miR-211-5p	TFAP2A	transcription factor AP-2 alpha
Details	30	91	hsa-miR-466	TFAP2A	transcription factor AP-2 alpha
Details	31	91	hsa-miR-204-5p	TFAP2A	transcription factor AP-2 alpha
Details	32	91	hsa-miR-187-5p	TFAP2A	transcription factor AP-2 alpha
Details	33	91	hsa-miR-4301	TFAP2A	transcription factor AP-2 alpha
Details	34	90	hsa-miR-9500	TFAP2A	transcription factor AP-2 alpha
Details	35	90	hsa-miR-4789-3p	TFAP2A	transcription factor AP-2 alpha
Details	36	90	hsa-miR-651-3p	TFAP2A	transcription factor AP-2 alpha
Details	37	89	hsa-miR-548c-3p	TFAP2A	transcription factor AP-2 alpha
Details	38	89	hsa-miR-6834-5p	TFAP2A	transcription factor AP-2 alpha
Details	39	88	hsa-miR-599	TFAP2A	transcription factor AP-2 alpha
Details	40	88	hsa-miR-629-3p	TFAP2A	transcription factor AP-2 alpha
Details	41	87	hsa-miR-623	TFAP2A	transcription factor AP-2 alpha
Details	42	87	hsa-miR-1297	TFAP2A	transcription factor AP-2 alpha
Details	43	87	hsa-miR-4281	TFAP2A	transcription factor AP-2 alpha
Details	44	87	hsa-miR-8060	TFAP2A	transcription factor AP-2 alpha
Details	45	86	hsa-miR-124-5p	TFAP2A	transcription factor AP-2 alpha
Details	46	86	hsa-miR-5580-5p	TFAP2A	transcription factor AP-2 alpha
Details	47	85	hsa-miR-7161-5p	TFAP2A	transcription factor AP-2 alpha
Details	48	85	hsa-miR-1285-3p	TFAP2A	transcription factor AP-2 alpha
Details	49	85	hsa-miR-513b-5p	TFAP2A	transcription factor AP-2 alpha
Details	50	85	hsa-miR-5189-5p	TFAP2A	transcription factor AP-2 alpha
Details	51	84	hsa-miR-548u	TFAP2A	transcription factor AP-2 alpha
Details	52	83	hsa-miR-6860	TFAP2A	transcription factor AP-2 alpha
Details	53	83	hsa-miR-516a-3p	TFAP2A	transcription factor AP-2 alpha
Details	54	83	hsa-miR-516b-3p	TFAP2A	transcription factor AP-2 alpha
Details	55	83	hsa-miR-612	TFAP2A	transcription factor AP-2 alpha
Details	56	83	hsa-miR-3187-5p	TFAP2A	transcription factor AP-2 alpha
Details	57	83	hsa-miR-7162-5p	TFAP2A	transcription factor AP-2 alpha
Details	58	82	hsa-miR-664b-5p	TFAP2A	transcription factor AP-2 alpha
Details	59	82	hsa-miR-26a-5p	TFAP2A	transcription factor AP-2 alpha
Details	60	82	hsa-miR-26b-5p	TFAP2A	transcription factor AP-2 alpha
Details	61	82	hsa-miR-3185	TFAP2A	transcription factor AP-2 alpha
Details	62	82	hsa-miR-10522-5p	TFAP2A	transcription factor AP-2 alpha
Details	63	81	hsa-miR-10398-3p	TFAP2A	transcription factor AP-2 alpha
Details	64	81	hsa-miR-6124	TFAP2A	transcription factor AP-2 alpha
Details	65	80	hsa-miR-6879-3p	TFAP2A	transcription factor AP-2 alpha
Details	66	80	hsa-miR-4275	TFAP2A	transcription factor AP-2 alpha
Details	67	79	hsa-miR-4672	TFAP2A	transcription factor AP-2 alpha
Details	68	79	hsa-miR-3941	TFAP2A	transcription factor AP-2 alpha
Details	69	79	hsa-miR-26b-3p	TFAP2A	transcription factor AP-2 alpha
Details	70	79	hsa-miR-2054	TFAP2A	transcription factor AP-2 alpha
Details	71	79	hsa-miR-3125	TFAP2A	transcription factor AP-2 alpha
Details	72	79	hsa-miR-3916	TFAP2A	transcription factor AP-2 alpha
Details	73	78	hsa-miR-6859-5p	TFAP2A	transcription factor AP-2 alpha
Details	74	78	hsa-miR-4252	TFAP2A	transcription factor AP-2 alpha
Details	75	77	hsa-miR-4465	TFAP2A	transcription factor AP-2 alpha
Details	76	75	hsa-miR-6839-3p	TFAP2A	transcription factor AP-2 alpha
Details	77	75	hsa-miR-3960	TFAP2A	transcription factor AP-2 alpha
Details	78	75	hsa-miR-145-3p	TFAP2A	transcription factor AP-2 alpha
Details	79	74	hsa-miR-3919	TFAP2A	transcription factor AP-2 alpha
Details	80	73	hsa-miR-1298-3p	TFAP2A	transcription factor AP-2 alpha
Details	81	73	hsa-miR-6867-3p	TFAP2A	transcription factor AP-2 alpha
Details	82	72	hsa-miR-548j-5p	TFAP2A	transcription factor AP-2 alpha
Details	83	72	hsa-miR-559	TFAP2A	transcription factor AP-2 alpha
Details	84	72	hsa-miR-548c-5p	TFAP2A	transcription factor AP-2 alpha
Details	85	72	hsa-miR-548b-5p	TFAP2A	transcription factor AP-2 alpha
Details	86	72	hsa-miR-548ad-5p	TFAP2A	transcription factor AP-2 alpha
Details	87	72	hsa-miR-548d-5p	TFAP2A	transcription factor AP-2 alpha
Details	88	72	hsa-miR-548h-5p	TFAP2A	transcription factor AP-2 alpha
Details	89	72	hsa-miR-548a-5p	TFAP2A	transcription factor AP-2 alpha
Details	90	72	hsa-miR-548i	TFAP2A	transcription factor AP-2 alpha
Details	91	72	hsa-miR-548as-5p	TFAP2A	transcription factor AP-2 alpha
Details	92	72	hsa-miR-664a-3p	TFAP2A	transcription factor AP-2 alpha
Details	93	72	hsa-miR-548w	TFAP2A	transcription factor AP-2 alpha
Details	94	72	hsa-miR-548ab	TFAP2A	transcription factor AP-2 alpha
Details	95	72	hsa-miR-302c-5p	TFAP2A	transcription factor AP-2 alpha
Details	96	72	hsa-miR-548ay-5p	TFAP2A	transcription factor AP-2 alpha
Details	97	72	hsa-miR-548o-5p	TFAP2A	transcription factor AP-2 alpha
Details	98	72	hsa-miR-548ap-5p	TFAP2A	transcription factor AP-2 alpha
Details	99	72	hsa-miR-548ar-5p	TFAP2A	transcription factor AP-2 alpha
Details	100	72	hsa-miR-548au-5p	TFAP2A	transcription factor AP-2 alpha
Details	101	72	hsa-miR-3167	TFAP2A	transcription factor AP-2 alpha
Details	102	72	hsa-miR-548y	TFAP2A	transcription factor AP-2 alpha
Details	103	72	hsa-miR-548ae-5p	TFAP2A	transcription factor AP-2 alpha
Details	104	72	hsa-miR-548am-5p	TFAP2A	transcription factor AP-2 alpha
Details	105	72	hsa-miR-548ak	TFAP2A	transcription factor AP-2 alpha
Details	106	72	hsa-miR-548bb-5p	TFAP2A	transcription factor AP-2 alpha
Details	107	71	hsa-miR-876-5p	TFAP2A	transcription factor AP-2 alpha
Details	108	70	hsa-miR-616-3p	TFAP2A	transcription factor AP-2 alpha
Details	109	70	hsa-miR-181a-2-3p	TFAP2A	transcription factor AP-2 alpha
Details	110	69	hsa-miR-7106-5p	TFAP2A	transcription factor AP-2 alpha
Details	111	69	hsa-miR-6825-5p	TFAP2A	transcription factor AP-2 alpha
Details	112	69	hsa-miR-3154	TFAP2A	transcription factor AP-2 alpha
Details	113	69	hsa-miR-10400-5p	TFAP2A	transcription factor AP-2 alpha
Details	114	68	hsa-miR-4311	TFAP2A	transcription factor AP-2 alpha
Details	115	68	hsa-miR-4467	TFAP2A	transcription factor AP-2 alpha
Details	116	68	hsa-miR-583	TFAP2A	transcription factor AP-2 alpha
Details	117	67	hsa-miR-6506-3p	TFAP2A	transcription factor AP-2 alpha
Details	118	67	hsa-miR-4435	TFAP2A	transcription factor AP-2 alpha
Details	119	66	hsa-miR-3616-3p	TFAP2A	transcription factor AP-2 alpha
Details	120	66	hsa-miR-744-3p	TFAP2A	transcription factor AP-2 alpha
Details	121	66	hsa-miR-548aq-5p	TFAP2A	transcription factor AP-2 alpha
Details	122	66	hsa-miR-8072	TFAP2A	transcription factor AP-2 alpha
Details	123	66	hsa-miR-1226-5p	TFAP2A	transcription factor AP-2 alpha
Details	124	65	hsa-miR-3119	TFAP2A	transcription factor AP-2 alpha
Details	125	65	hsa-miR-4739	TFAP2A	transcription factor AP-2 alpha
Details	126	65	hsa-miR-4756-5p	TFAP2A	transcription factor AP-2 alpha
Details	127	65	hsa-miR-5003-3p	TFAP2A	transcription factor AP-2 alpha
Details	128	65	hsa-miR-376c-3p	TFAP2A	transcription factor AP-2 alpha
Details	129	65	hsa-miR-1321	TFAP2A	transcription factor AP-2 alpha
Details	130	65	hsa-miR-12123	TFAP2A	transcription factor AP-2 alpha
Details	131	65	hsa-miR-1178-3p	TFAP2A	transcription factor AP-2 alpha
Details	132	65	hsa-miR-4643	TFAP2A	transcription factor AP-2 alpha
Details	133	64	hsa-miR-186-5p	TFAP2A	transcription factor AP-2 alpha
Details	134	64	hsa-miR-4775	TFAP2A	transcription factor AP-2 alpha
Details	135	64	hsa-miR-2052	TFAP2A	transcription factor AP-2 alpha
Details	136	63	hsa-miR-380-3p	TFAP2A	transcription factor AP-2 alpha
Details	137	63	hsa-miR-19b-2-5p	TFAP2A	transcription factor AP-2 alpha
Details	138	63	hsa-miR-4261	TFAP2A	transcription factor AP-2 alpha
Details	139	63	hsa-miR-19b-1-5p	TFAP2A	transcription factor AP-2 alpha
Details	140	63	hsa-miR-19a-5p	TFAP2A	transcription factor AP-2 alpha
Details	141	62	hsa-miR-5584-5p	TFAP2A	transcription factor AP-2 alpha
Details	142	62	hsa-miR-889-5p	TFAP2A	transcription factor AP-2 alpha
Details	143	62	hsa-miR-4802-3p	TFAP2A	transcription factor AP-2 alpha
Details	144	62	hsa-miR-135b-5p	TFAP2A	transcription factor AP-2 alpha
Details	145	62	hsa-miR-6844	TFAP2A	transcription factor AP-2 alpha
Details	146	62	hsa-miR-135a-5p	TFAP2A	transcription factor AP-2 alpha
Details	147	62	hsa-miR-488-3p	TFAP2A	transcription factor AP-2 alpha
Details	148	62	hsa-miR-4729	TFAP2A	transcription factor AP-2 alpha
Details	149	61	hsa-miR-6505-5p	TFAP2A	transcription factor AP-2 alpha
Details	150	61	hsa-miR-2117	TFAP2A	transcription factor AP-2 alpha
Details	151	61	hsa-miR-323a-5p	TFAP2A	transcription factor AP-2 alpha
Details	152	61	hsa-miR-628-3p	TFAP2A	transcription factor AP-2 alpha
Details	153	60	hsa-miR-1266-3p	TFAP2A	transcription factor AP-2 alpha
Details	154	60	hsa-miR-8085	TFAP2A	transcription factor AP-2 alpha
Details	155	60	hsa-miR-4511	TFAP2A	transcription factor AP-2 alpha
Details	156	60	hsa-miR-6856-5p	TFAP2A	transcription factor AP-2 alpha
Details	157	60	hsa-miR-6511b-3p	TFAP2A	transcription factor AP-2 alpha
Details	158	60	hsa-miR-6731-5p	TFAP2A	transcription factor AP-2 alpha
Details	159	60	hsa-miR-6511a-3p	TFAP2A	transcription factor AP-2 alpha
Details	160	60	hsa-miR-6758-5p	TFAP2A	transcription factor AP-2 alpha
Details	161	59	hsa-miR-576-5p	TFAP2A	transcription factor AP-2 alpha
Details	162	59	hsa-miR-518f-3p	TFAP2A	transcription factor AP-2 alpha
Details	163	59	hsa-miR-518b	TFAP2A	transcription factor AP-2 alpha
Details	164	59	hsa-miR-4263	TFAP2A	transcription factor AP-2 alpha
Details	165	59	hsa-miR-3617-5p	TFAP2A	transcription factor AP-2 alpha
Details	166	59	hsa-miR-3143	TFAP2A	transcription factor AP-2 alpha
Details	167	59	hsa-miR-3671	TFAP2A	transcription factor AP-2 alpha
Details	168	59	hsa-miR-641	TFAP2A	transcription factor AP-2 alpha
Details	169	59	hsa-miR-518d-3p	TFAP2A	transcription factor AP-2 alpha
Details	170	59	hsa-miR-518a-3p	TFAP2A	transcription factor AP-2 alpha
Details	171	59	hsa-miR-526a-3p	TFAP2A	transcription factor AP-2 alpha
Details	172	59	hsa-miR-518c-3p	TFAP2A	transcription factor AP-2 alpha
Details	173	58	hsa-let-7f-2-3p	TFAP2A	transcription factor AP-2 alpha
Details	174	58	hsa-miR-1185-1-3p	TFAP2A	transcription factor AP-2 alpha
Details	175	58	hsa-miR-4267	TFAP2A	transcription factor AP-2 alpha
Details	176	58	hsa-miR-1185-2-3p	TFAP2A	transcription factor AP-2 alpha
Details	177	58	hsa-miR-383-5p	TFAP2A	transcription factor AP-2 alpha
Details	178	57	hsa-miR-146a-3p	TFAP2A	transcription factor AP-2 alpha
Details	179	55	hsa-miR-1277-5p	TFAP2A	transcription factor AP-2 alpha
Details	180	55	hsa-miR-4424	TFAP2A	transcription factor AP-2 alpha
Details	181	55	hsa-miR-4724-3p	TFAP2A	transcription factor AP-2 alpha
Details	182	55	hsa-miR-10525-3p	TFAP2A	transcription factor AP-2 alpha
Details	183	54	hsa-miR-6805-3p	TFAP2A	transcription factor AP-2 alpha
Details	184	54	hsa-miR-6715b-3p	TFAP2A	transcription factor AP-2 alpha
Details	185	54	hsa-miR-5010-3p	TFAP2A	transcription factor AP-2 alpha
Details	186	54	hsa-miR-5583-5p	TFAP2A	transcription factor AP-2 alpha
Details	187	54	hsa-miR-5691	TFAP2A	transcription factor AP-2 alpha
Details	188	54	hsa-miR-3129-3p	TFAP2A	transcription factor AP-2 alpha
Details	189	54	hsa-miR-4316	TFAP2A	transcription factor AP-2 alpha
Details	190	53	hsa-miR-4759	TFAP2A	transcription factor AP-2 alpha
Details	191	53	hsa-miR-12120	TFAP2A	transcription factor AP-2 alpha
Details	192	53	hsa-miR-4710	TFAP2A	transcription factor AP-2 alpha
Details	193	52	hsa-miR-4799-5p	TFAP2A	transcription factor AP-2 alpha
Details	194	52	hsa-miR-4524a-5p	TFAP2A	transcription factor AP-2 alpha
Details	195	52	hsa-miR-1207-3p	TFAP2A	transcription factor AP-2 alpha
Details	196	52	hsa-miR-299-5p	TFAP2A	transcription factor AP-2 alpha
Details	197	52	hsa-miR-4747-5p	TFAP2A	transcription factor AP-2 alpha
Details	198	52	hsa-miR-661	TFAP2A	transcription factor AP-2 alpha
Details	199	52	hsa-miR-4524b-5p	TFAP2A	transcription factor AP-2 alpha
Details	200	52	hsa-miR-5196-5p	TFAP2A	transcription factor AP-2 alpha
Details	201	52	hsa-miR-5695	TFAP2A	transcription factor AP-2 alpha
Details	202	51	hsa-miR-6734-5p	TFAP2A	transcription factor AP-2 alpha
Details	203	51	hsa-miR-12132	TFAP2A	transcription factor AP-2 alpha
Details	204	51	hsa-miR-1202	TFAP2A	transcription factor AP-2 alpha
Details	205	51	hsa-miR-7856-5p	TFAP2A	transcription factor AP-2 alpha

## Sheet: Starbase
Supplementary Table 3. Potential miRNA targets of TFAP2A in four databases (mirDIP, miRDB, miRWalk and StarBase).
#please cite:
#Zhou KR, Liu S, Cai L, et al. ENCORI: The Encyclopedia of RNA Interactomes.
#2.Li JH, et al.starBase v2.0: decoding miRNA-ceRNA, miRNA-ncRNA and protein-RNA interaction networks from large-scale CLIP-Seq data , Nucleic Acids Res. 2014 Jan;42:D92-7.
miRNAid	miRNAname	geneID	geneName	geneType	chromosome	narrowStart	narrowEnd	broadStart	broadEnd	strand	clipExpNum	degraExpNum	RBP	PITA	RNA22	miRmap	microT	miRanda	PicTar	TargetScan	pancancerNum
MIMAT0000062	hsa-let-7a-5p	ENSG00000137203	TFAP2A	protein_coding	chr6	10397871	10397876	10397870	10397898	-	4	0	AGO1-4,AGO2	1	0	0	1	1	0	0	4
MIMAT0000062	hsa-let-7a-5p	ENSG00000137203	TFAP2A	protein_coding	chr6	10398721	10398749	10398721	10398749	-	8	0	AGO1-4,AGO2	0	0	0	1	0	0	0	4
MIMAT0000062	hsa-let-7a-5p	ENSG00000137203	TFAP2A	protein_coding	chr6	10410153	10410181	10410153	10410181	-	8	0	AGO1,AGO1-4,AGO2	0	0	0	1	0	0	0	4
MIMAT0000063	hsa-let-7b-5p	ENSG00000137203	TFAP2A	protein_coding	chr6	10397871	10397876	10397870	10397898	-	4	0	AGO1-4,AGO2	1	0	0	1	1	0	0	3
MIMAT0000063	hsa-let-7b-5p	ENSG00000137203	TFAP2A	protein_coding	chr6	10398721	10398749	10398721	10398749	-	8	0	AGO1-4,AGO2	0	0	0	1	0	0	0	3
MIMAT0000063	hsa-let-7b-5p	ENSG00000137203	TFAP2A	protein_coding	chr6	10410153	10410181	10410153	10410181	-	8	0	AGO1,AGO1-4,AGO2	0	0	0	1	0	0	0	3
MIMAT0000064	hsa-let-7c-5p	ENSG00000137203	TFAP2A	protein_coding	chr6	10397871	10397876	10397870	10397898	-	4	0	AGO1-4,AGO2	1	0	0	1	1	0	0	10
MIMAT0000064	hsa-let-7c-5p	ENSG00000137203	TFAP2A	protein_coding	chr6	10398721	10398749	10398721	10398749	-	8	0	AGO1-4,AGO2	0	0	0	1	0	0	0	10
MIMAT0000064	hsa-let-7c-5p	ENSG00000137203	TFAP2A	protein_coding	chr6	10410153	10410181	10410153	10410181	-	8	0	AGO1,AGO1-4,AGO2	0	0	0	1	0	0	0	10
MIMAT0000065	hsa-let-7d-5p	ENSG00000137203	TFAP2A	protein_coding	chr6	10397871	10397876	10397870	10397898	-	4	0	AGO1-4,AGO2	1	0	0	1	1	0	0	8
MIMAT0000065	hsa-let-7d-5p	ENSG00000137203	TFAP2A	protein_coding	chr6	10398721	10398749	10398721	10398749	-	8	0	AGO1-4,AGO2	0	0	0	1	0	0	0	8
MIMAT0000066	hsa-let-7e-5p	ENSG00000137203	TFAP2A	protein_coding	chr6	10397871	10397876	10397870	10397898	-	4	0	AGO1-4,AGO2	1	0	0	1	1	1	0	8
MIMAT0000066	hsa-let-7e-5p	ENSG00000137203	TFAP2A	protein_coding	chr6	10398721	10398749	10398721	10398749	-	8	0	AGO1-4,AGO2	0	0	0	1	0	0	0	8
MIMAT0000066	hsa-let-7e-5p	ENSG00000137203	TFAP2A	protein_coding	chr6	10410153	10410181	10410153	10410181	-	8	0	AGO1,AGO1-4,AGO2	0	0	0	1	0	0	0	8
MIMAT0000067	hsa-let-7f-5p	ENSG00000137203	TFAP2A	protein_coding	chr6	10397871	10397876	10397870	10397898	-	4	0	AGO1-4,AGO2	1	0	0	1	1	0	0	5
MIMAT0000067	hsa-let-7f-5p	ENSG00000137203	TFAP2A	protein_coding	chr6	10398721	10398749	10398721	10398749	-	8	0	AGO1-4,AGO2	0	0	0	1	0	0	0	5
MIMAT0000067	hsa-let-7f-5p	ENSG00000137203	TFAP2A	protein_coding	chr6	10410153	10410181	10410153	10410181	-	8	0	AGO1,AGO1-4,AGO2	0	0	0	1	0	0	0	5
MIMAT0000068	hsa-miR-15a-5p	ENSG00000137203	TFAP2A	protein_coding	chr6	10398538	10398538	10398532	10398544	-	12	0	AGO1,AGO1-4,AGO2,AGO3	3	0	3	0	0	0	0	7
MIMAT0000068	hsa-miR-15a-5p	ENSG00000137203	TFAP2A	protein_coding	chr6	10398550	10398553	10398547	10398556	-	12	0	AGO1,AGO1-4,AGO2,AGO3	2	0	2	0	0	0	0	7
MIMAT0000069	hsa-miR-16-5p	ENSG00000137203	TFAP2A	protein_coding	chr6	10398538	10398538	10398532	10398544	-	12	0	AGO1,AGO1-4,AGO2,AGO3	3	0	3	0	0	0	0	5
MIMAT0000069	hsa-miR-16-5p	ENSG00000137203	TFAP2A	protein_coding	chr6	10398550	10398553	10398547	10398556	-	12	0	AGO1,AGO1-4,AGO2,AGO3	2	0	2	0	0	0	0	5
MIMAT0000072	hsa-miR-18a-5p	ENSG00000137203	TFAP2A	protein_coding	chr6	10398199	10398204	10398199	10398204	-	8	0	AGO1,AGO1-4,AGO2	1	0	0	0	0	0	0	3
MIMAT0000077	hsa-miR-22-3p	ENSG00000137203	TFAP2A	protein_coding	chr6	10397145	10397150	10397145	10397150	-	1	0	AGO1-4	1	0	0	0	0	0	0	9
MIMAT0000081	hsa-miR-25-3p	ENSG00000137203	TFAP2A	protein_coding	chr6	10397153	10397158	10397152	10397158	-	2	0	AGO1-4,AGO2	1	0	0	0	0	1	1	6
MIMAT0000082	hsa-miR-26a-5p	ENSG00000137203	TFAP2A	protein_coding	chr6	10398023	10398028	10398022	10398050	-	11	0	AGO1-4,AGO2	1	0	0	1	0	1	1	7
MIMAT0000082	hsa-miR-26a-5p	ENSG00000137203	TFAP2A	protein_coding	chr6	10398100	10398105	10398099	10398127	-	12	0	AGO1-4,AGO2	1	0	0	1	1	1	1	7
MIMAT0000083	hsa-miR-26b-5p	ENSG00000137203	TFAP2A	protein_coding	chr6	10398023	10398028	10398022	10398050	-	11	0	AGO1-4,AGO2	1	0	1	1	0	1	1	8
MIMAT0000083	hsa-miR-26b-5p	ENSG00000137203	TFAP2A	protein_coding	chr6	10398100	10398105	10398099	10398127	-	12	0	AGO1-4,AGO2	1	0	1	1	1	1	1	8
MIMAT0000085	hsa-miR-28-5p	ENSG00000137203	TFAP2A	protein_coding	chr6	10397159	10397164	10397159	10397164	-	2	0	AGO1-4,AGO2	1	0	0	0	0	0	0	10
MIMAT0000087	hsa-miR-30a-5p	ENSG00000137203	TFAP2A	protein_coding	chr6	10397874	10397880	10397873	10397894	-	4	0	AGO1-4,AGO2	1	0	0	0	1	0	0	10
MIMAT0000090	hsa-miR-32-5p	ENSG00000137203	TFAP2A	protein_coding	chr6	10397153	10397158	10397152	10397158	-	2	0	AGO1-4,AGO2	1	0	0	0	0	1	1	8
MIMAT0000092	hsa-miR-92a-3p	ENSG00000137203	TFAP2A	protein_coding	chr6	10397153	10397158	10397152	10397158	-	2	0	AGO1-4,AGO2	1	0	0	0	0	1	1	5
MIMAT0000095	hsa-miR-96-5p	ENSG00000137203	TFAP2A	protein_coding	chr6	10398339	10398344	10398338	10398366	-	3	0	AGO1-4,AGO2	1	1	0	1	0	0	0	2
MIMAT0000095	hsa-miR-96-5p	ENSG00000137203	TFAP2A	protein_coding	chr6	10400761	10400789	10400761	10400789	-	2	0	AGO1-4	0	0	0	1	0	0	0	2
MIMAT0000096	hsa-miR-98-5p	ENSG00000137203	TFAP2A	protein_coding	chr6	10397871	10397876	10397870	10397898	-	4	0	AGO1-4,AGO2	1	0	0	1	1	0	0	11
MIMAT0000096	hsa-miR-98-5p	ENSG00000137203	TFAP2A	protein_coding	chr6	10398721	10398749	10398721	10398749	-	8	0	AGO1-4,AGO2	0	0	0	1	0	0	0	11
MIMAT0000096	hsa-miR-98-5p	ENSG00000137203	TFAP2A	protein_coding	chr6	10410153	10410181	10410153	10410181	-	8	0	AGO1,AGO1-4,AGO2	0	0	0	1	0	0	0	11
MIMAT0000101	hsa-miR-103a-3p	ENSG00000137203	TFAP2A	protein_coding	chr6	10398533	10398535	10398530	10398538	-	4	0	AGO1-4	2	0	0	0	0	0	0	8
MIMAT0000101	hsa-miR-103a-3p	ENSG00000137203	TFAP2A	protein_coding	chr6	10398539	10398541	10398536	10398544	-	12	0	AGO1,AGO1-4,AGO2,AGO3	2	0	0	0	0	0	0	8
MIMAT0000101	hsa-miR-103a-3p	ENSG00000137203	TFAP2A	protein_coding	chr6	10398551	10398553	10398548	10398556	-	12	0	AGO1,AGO1-4,AGO2,AGO3	2	0	0	0	0	0	0	8
MIMAT0000102	hsa-miR-105-5p	ENSG00000137203	TFAP2A	protein_coding	chr6	10397425	10397430	10397425	10397430	-	5	0	AGO1,AGO1-4,AGO2	1	0	0	0	0	0	0	3
MIMAT0000104	hsa-miR-107	ENSG00000137203	TFAP2A	protein_coding	chr6	10398533	10398535	10398530	10398538	-	4	0	AGO1-4	2	0	0	0	0	0	0	8
MIMAT0000104	hsa-miR-107	ENSG00000137203	TFAP2A	protein_coding	chr6	10398539	10398541	10398536	10398544	-	12	0	AGO1,AGO1-4,AGO2,AGO3	2	0	0	0	0	0	0	8
MIMAT0000104	hsa-miR-107	ENSG00000137203	TFAP2A	protein_coding	chr6	10398551	10398553	10398548	10398556	-	12	0	AGO1,AGO1-4,AGO2,AGO3	2	0	0	0	0	0	0	8
MIMAT0000226	hsa-miR-196a-5p	ENSG00000137203	TFAP2A	protein_coding	chr6	10393433	10393439	10393433	10393439	-	1	0	AGO1-4	0	0	1	0	0	0	0	5
MIMAT0000227	hsa-miR-197-3p	ENSG00000137203	TFAP2A	protein_coding	chr6	10397919	10397924	10397918	10397946	-	8	0	AGO1-4,AGO2	1	0	0	1	1	0	0	6
MIMAT0000227	hsa-miR-197-3p	ENSG00000137203	TFAP2A	protein_coding	chr6	10404888	10404916	10404888	10404916	-	6	0	AGO1,AGO1-4,AGO2	0	0	0	1	0	0	0	6
MIMAT0000231	hsa-miR-199a-5p	ENSG00000137203	TFAP2A	protein_coding	chr6	10397395	10397400	10397395	10397400	-	6	0	AGO1-4,AGO2	1	0	0	0	0	0	0	7
MIMAT0000242	hsa-miR-129-5p	ENSG00000137203	TFAP2A	protein_coding	chr6	10398274	10398279	10398274	10398279	-	1	0	AGO2	1	0	0	0	0	0	0	12
MIMAT0000244	hsa-miR-30c-5p	ENSG00000137203	TFAP2A	protein_coding	chr6	10397874	10397880	10397873	10397895	-	4	0	AGO1-4,AGO2	1	0	0	0	1	0	0	9
MIMAT0000245	hsa-miR-30d-5p	ENSG00000137203	TFAP2A	protein_coding	chr6	10397874	10397880	10397873	10397894	-	4	0	AGO1-4,AGO2	1	0	0	0	1	0	0	10
MIMAT0000251	hsa-miR-147a	ENSG00000137203	TFAP2A	protein_coding	chr6	10412145	10412160	10412145	10412160	-	2	0	AGO2	0	1	0	0	0	0	0	1
MIMAT0000252	hsa-miR-7-5p	ENSG00000137203	TFAP2A	protein_coding	chr6	10397846	10397851	10397846	10397851	-	3	0	AGO1-4	1	0	0	0	0	0	0	8
MIMAT0000255	hsa-miR-34a-5p	ENSG00000137203	TFAP2A	protein_coding	chr6	10398478	10398483	10398478	10398483	-	3	0	AGO1-4	1	0	0	0	0	0	0	9
MIMAT0000259	hsa-miR-182-5p	ENSG00000137203	TFAP2A	protein_coding	chr6	10398339	10398344	10398338	10398366	-	3	0	AGO1-4,AGO2	1	0	0	1	0	0	0	1
MIMAT0000259	hsa-miR-182-5p	ENSG00000137203	TFAP2A	protein_coding	chr6	10400761	10400789	10400761	10400789	-	2	0	AGO1-4	0	0	0	1	0	0	0	1
MIMAT0000263	hsa-miR-199b-5p	ENSG00000137203	TFAP2A	protein_coding	chr6	10397395	10397400	10397395	10397400	-	6	0	AGO1-4,AGO2	1	0	0	0	0	0	0	7
MIMAT0000265	hsa-miR-204-5p	ENSG00000137203	TFAP2A	protein_coding	chr6	10397985	10397990	10397984	10398012	-	14	0	AGO1,AGO1-4,AGO2,AGO3	1	0	0	1	1	1	1	12
MIMAT0000268	hsa-miR-211-5p	ENSG00000137203	TFAP2A	protein_coding	chr6	10397985	10397990	10397984	10398012	-	14	0	AGO1,AGO1-4,AGO2,AGO3	1	0	0	1	1	1	1	7
MIMAT0000271	hsa-miR-214-3p	ENSG00000137203	TFAP2A	protein_coding	chr6	10398536	10398536	10398530	10398564	-	12	1	AGO1,AGO1-4,AGO2,AGO3	2	0	2	3	0	0	0	4
MIMAT0000271	hsa-miR-214-3p	ENSG00000137203	TFAP2A	protein_coding	chr6	10398540	10398542	10398537	10398567	-	12	1	AGO1,AGO1-4,AGO2,AGO3	2	0	2	1	0	0	0	4
MIMAT0000271	hsa-miR-214-3p	ENSG00000137203	TFAP2A	protein_coding	chr6	10398552	10398554	10398548	10398579	-	12	1	AGO1,AGO1-4,AGO2,AGO3	2	0	2	2	0	0	0	4
MIMAT0000271	hsa-miR-214-3p	ENSG00000137203	TFAP2A	protein_coding	chr6	10398907	10398935	10398907	10398935	-	3	0	AGO1-4	0	0	0	1	0	0	0	4
MIMAT0000271	hsa-miR-214-3p	ENSG00000137203	TFAP2A	protein_coding	chr6	10404757	10404785	10404757	10404785	-	1	0	AGO1-4	0	0	0	1	0	0	0	4
MIMAT0000275	hsa-miR-218-5p	ENSG00000137203	TFAP2A	protein_coding	chr6	10398657	10398677	10398657	10398677	-	4	0	AGO1-4	0	0	0	0	1	0	0	14
MIMAT0000278	hsa-miR-221-3p	ENSG00000137203	TFAP2A	protein_coding	chr6	10397750	10397755	10397749	10397755	-	9	0	AGO1,AGO1-4,AGO2,AGO3	1	0	1	0	0	0	1	4
MIMAT0000278	hsa-miR-221-3p	ENSG00000137203	TFAP2A	protein_coding	chr6	10398170	10398175	10398170	10398175	-	7	0	AGO1-4,AGO2	1	0	1	0	0	0	0	4
MIMAT0000279	hsa-miR-222-3p	ENSG00000137203	TFAP2A	protein_coding	chr6	10397750	10397755	10397749	10397755	-	9	0	AGO1,AGO1-4,AGO2,AGO3	1	0	1	0	0	0	1	2
MIMAT0000279	hsa-miR-222-3p	ENSG00000137203	TFAP2A	protein_coding	chr6	10398170	10398175	10398169	10398188	-	9	0	AGO1,AGO1-4,AGO2	1	0	1	0	1	0	0	2
MIMAT0000318	hsa-miR-200b-3p	ENSG00000137203	TFAP2A	protein_coding	chr6	10397215	10397221	10397214	10397234	-	2	0	AGO1-4	1	0	1	0	1	0	1	6
MIMAT0000318	hsa-miR-200b-3p	ENSG00000137203	TFAP2A	protein_coding	chr6	10397679	10397707	10397679	10397707	-	1	0	AGO1-4	0	0	0	1	0	0	0	6
MIMAT0000318	hsa-miR-200b-3p	ENSG00000137203	TFAP2A	protein_coding	chr6	10398114	10398120	10398113	10398141	-	12	0	AGO1-4,AGO2	1	0	1	1	1	0	1	6
MIMAT0000414	hsa-let-7g-5p	ENSG00000137203	TFAP2A	protein_coding	chr6	10397871	10397876	10397870	10397898	-	4	0	AGO1-4,AGO2	1	0	0	1	1	0	0	10
MIMAT0000414	hsa-let-7g-5p	ENSG00000137203	TFAP2A	protein_coding	chr6	10398721	10398749	10398721	10398749	-	8	0	AGO1-4,AGO2	0	0	0	1	0	0	0	10
MIMAT0000414	hsa-let-7g-5p	ENSG00000137203	TFAP2A	protein_coding	chr6	10410153	10410181	10410153	10410181	-	8	0	AGO1,AGO1-4,AGO2	0	0	0	1	0	0	0	10
MIMAT0000415	hsa-let-7i-5p	ENSG00000137203	TFAP2A	protein_coding	chr6	10397871	10397876	10397870	10397898	-	4	0	AGO1-4,AGO2	1	0	0	1	1	0	0	4
MIMAT0000415	hsa-let-7i-5p	ENSG00000137203	TFAP2A	protein_coding	chr6	10398721	10398749	10398721	10398749	-	8	0	AGO1-4,AGO2	0	0	0	1	0	0	0	4
MIMAT0000415	hsa-let-7i-5p	ENSG00000137203	TFAP2A	protein_coding	chr6	10410153	10410181	10410153	10410181	-	8	0	AGO1,AGO1-4,AGO2	0	0	0	1	0	0	0	4
MIMAT0000417	hsa-miR-15b-5p	ENSG00000137203	TFAP2A	protein_coding	chr6	10398538	10398538	10398532	10398544	-	12	0	AGO1,AGO1-4,AGO2,AGO3	3	0	3	0	0	0	0	4
MIMAT0000417	hsa-miR-15b-5p	ENSG00000137203	TFAP2A	protein_coding	chr6	10398550	10398553	10398547	10398556	-	12	0	AGO1,AGO1-4,AGO2,AGO3	2	0	2	0	0	0	0	4
MIMAT0000420	hsa-miR-30b-5p	ENSG00000137203	TFAP2A	protein_coding	chr6	10397874	10397880	10397873	10397894	-	4	0	AGO1-4,AGO2	1	0	0	0	1	0	0	8
MIMAT0000427	hsa-miR-133a-3p	ENSG00000137203	TFAP2A	protein_coding	chr6	10398028	10398033	10398028	10398033	-	11	0	AGO1-4,AGO2	1	0	0	0	0	0	0	8
MIMAT0000428	hsa-miR-135a-5p	ENSG00000137203	TFAP2A	protein_coding	chr6	10398167	10398172	10398166	10398194	-	9	0	AGO1,AGO1-4,AGO2	1	0	0	1	1	1	1	13
MIMAT0000429	hsa-miR-137	ENSG00000137203	TFAP2A	protein_coding	chr6	10397152	10397157	10397151	10397157	-	2	0	AGO1-4,AGO2	1	0	0	0	0	1	1	3
MIMAT0000429	hsa-miR-137	ENSG00000137203	TFAP2A	protein_coding	chr6	10397516	10397522	10397515	10397536	-	1	0	AGO1-4	1	0	0	0	1	0	1	3
MIMAT0000430	hsa-miR-138-5p	ENSG00000137203	TFAP2A	protein_coding	chr6	10398611	10398617	10398610	10398634	-	5	0	AGO1-4,AGO2	1	1	0	0	0	0	0	6
MIMAT0000432	hsa-miR-141-3p	ENSG00000137203	TFAP2A	protein_coding	chr6	10397797	10397803	10397796	10397824	-	6	0	AGO1,AGO1-4,AGO2	1	0	1	1	1	0	0	1
MIMAT0000432	hsa-miR-141-3p	ENSG00000137203	TFAP2A	protein_coding	chr6	10397976	10397982	10397975	10398003	-	10	0	AGO1,AGO1-4,AGO2,AGO3	1	0	1	1	1	1	1	1
MIMAT0000433	hsa-miR-142-5p	ENSG00000137203	TFAP2A	protein_coding	chr6	10397277	10397282	10397277	10397282	-	2	0	AGO1-4	1	0	0	0	0	0	0	6
MIMAT0000435	hsa-miR-143-3p	ENSG00000137203	TFAP2A	protein_coding	chr6	10398815	10398833	10398815	10398843	-	9	0	AGO1,AGO1-4,AGO2,AGO3	0	0	0	1	1	0	0	10
MIMAT0000436	hsa-miR-144-3p	ENSG00000137203	TFAP2A	protein_coding	chr6	10396972	10396991	10396972	10396991	-	2	0	AGO2	0	0	0	0	1	0	0	7
MIMAT0000447	hsa-miR-134-5p	ENSG00000137203	TFAP2A	protein_coding	chr6	10398205	10398210	10398205	10398210	-	8	0	AGO1,AGO1-4,AGO2	1	0	0	0	0	0	0	4
MIMAT0000450	hsa-miR-149-5p	ENSG00000137203	TFAP2A	protein_coding	chr6	10398358	10398363	10398357	10398380	-	2	0	AGO1-4	1	1	0	0	0	0	0	5
MIMAT0000455	hsa-miR-185-5p	ENSG00000137203	TFAP2A	protein_coding	chr6	10397175	10397180	10397174	10397197	-	2	0	AGO1-4,AGO2	1	0	1	0	1	0	0	9
MIMAT0000455	hsa-miR-185-5p	ENSG00000137203	TFAP2A	protein_coding	chr6	10397458	10397458	10397452	10397479	-	3	4	AGO1-4,AGO2	1	1	0	0	1	0	0	9
MIMAT0000455	hsa-miR-185-5p	ENSG00000137203	TFAP2A	protein_coding	chr6	10397461	10397465	10397459	10397467	-	2	3	AGO1-4	2	0	1	0	0	0	0	9
MIMAT0000455	hsa-miR-185-5p	ENSG00000137203	TFAP2A	protein_coding	chr6	10398449	10398454	10398449	10398454	-	3	0	AGO1,AGO1-4	1	0	1	0	0	0	0	9
MIMAT0000461	hsa-miR-195-5p	ENSG00000137203	TFAP2A	protein_coding	chr6	10398538	10398538	10398532	10398544	-	12	0	AGO1,AGO1-4,AGO2,AGO3	3	0	3	0	0	0	0	10
MIMAT0000461	hsa-miR-195-5p	ENSG00000137203	TFAP2A	protein_coding	chr6	10398550	10398553	10398547	10398556	-	12	0	AGO1,AGO1-4,AGO2,AGO3	2	0	2	0	0	0	0	10
MIMAT0000617	hsa-miR-200c-3p	ENSG00000137203	TFAP2A	protein_coding	chr6	10397215	10397221	10397214	10397235	-	2	0	AGO1-4	1	0	1	0	1	1	1	2
MIMAT0000617	hsa-miR-200c-3p	ENSG00000137203	TFAP2A	protein_coding	chr6	10397679	10397707	10397679	10397707	-	1	0	AGO1-4	0	0	0	1	0	0	0	2
MIMAT0000617	hsa-miR-200c-3p	ENSG00000137203	TFAP2A	protein_coding	chr6	10398114	10398120	10398113	10398141	-	12	0	AGO1-4,AGO2	1	0	1	1	1	1	1	2
MIMAT0000682	hsa-miR-200a-3p	ENSG00000137203	TFAP2A	protein_coding	chr6	10397797	10397803	10397796	10397824	-	6	0	AGO1,AGO1-4,AGO2	1	0	1	1	1	0	0	7
MIMAT0000682	hsa-miR-200a-3p	ENSG00000137203	TFAP2A	protein_coding	chr6	10397976	10397982	10397975	10398003	-	10	0	AGO1,AGO1-4,AGO2,AGO3	1	0	1	1	1	1	1	7
MIMAT0000686	hsa-miR-34c-5p	ENSG00000137203	TFAP2A	protein_coding	chr6	10398478	10398483	10398478	10398483	-	3	0	AGO1-4	1	0	0	0	0	0	0	2
MIMAT0000692	hsa-miR-30e-5p	ENSG00000137203	TFAP2A	protein_coding	chr6	10397874	10397880	10397873	10397894	-	4	0	AGO1-4,AGO2	1	0	0	0	1	0	0	10
MIMAT0000707	hsa-miR-363-3p	ENSG00000137203	TFAP2A	protein_coding	chr6	10397153	10397158	10397152	10397158	-	2	0	AGO1-4,AGO2	1	0	0	0	0	1	1	7
MIMAT0000719	hsa-miR-367-3p	ENSG00000137203	TFAP2A	protein_coding	chr6	10397153	10397158	10397152	10397158	-	2	0	AGO1-4,AGO2	1	0	0	0	0	1	1	1
MIMAT0000720	hsa-miR-376c-3p	ENSG00000137203	TFAP2A	protein_coding	chr6	10397585	10397591	10397584	10397604	-	1	0	AGO2	1	0	0	0	1	0	0	6
MIMAT0000727	hsa-miR-374a-5p	ENSG00000137203	TFAP2A	protein_coding	chr6	10398228	10398233	10398228	10398233	-	5	0	AGO1,AGO1-4,AGO2	1	0	0	0	0	0	0	13
MIMAT0000735	hsa-miR-380-3p	ENSG00000137203	TFAP2A	protein_coding	chr6	10398190	10398195	10398189	10398217	-	9	0	AGO1,AGO1-4,AGO2	1	0	0	1	0	0	0	5
MIMAT0000736	hsa-miR-381-3p	ENSG00000137203	TFAP2A	protein_coding	chr6	10397363	10397368	10397363	10397368	-	7	0	AGO1-4,AGO2	1	0	0	0	0	0	0	7
MIMAT0000737	hsa-miR-382-5p	ENSG00000137203	TFAP2A	protein_coding	chr6	10398025	10398030	10398025	10398030	-	11	0	AGO1-4,AGO2	1	0	0	0	0	0	0	6
MIMAT0000738	hsa-miR-383-5p	ENSG00000137203	TFAP2A	protein_coding	chr6	10397882	10397888	10397881	10397909	-	4	0	AGO1-4,AGO2	1	0	1	1	1	0	0	7
MIMAT0000758	hsa-miR-135b-5p	ENSG00000137203	TFAP2A	protein_coding	chr6	10398167	10398172	10398166	10398188	-	9	0	AGO1,AGO1-4,AGO2	1	0	0	0	1	0	1	2
MIMAT0000762	hsa-miR-324-3p	ENSG00000137203	TFAP2A	protein_coding	chr6	10398456	10398462	10398456	10398463	-	4	0	AGO1,AGO1-4	1	0	1	0	0	0	0	6
MIMAT0000763	hsa-miR-338-3p	ENSG00000137203	TFAP2A	protein_coding	chr6	10397350	10397355	10397350	10397355	-	6	0	AGO1-4,AGO2	1	0	0	0	0	0	0	8
MIMAT0000765	hsa-miR-335-5p	ENSG00000137203	TFAP2A	protein_coding	chr6	10397867	10397888	10397867	10397888	-	4	0	AGO1-4,AGO2	0	0	0	0	1	0	0	11
MIMAT0000770	hsa-miR-133b	ENSG00000137203	TFAP2A	protein_coding	chr6	10398028	10398033	10398028	10398033	-	11	0	AGO1-4,AGO2	1	0	0	0	0	0	0	6
MIMAT0001080	hsa-miR-196b-5p	ENSG00000137203	TFAP2A	protein_coding	chr6	10393433	10393439	10393433	10393439	-	1	0	AGO1-4	0	0	1	0	0	0	0	8
MIMAT0001341	hsa-miR-424-5p	ENSG00000137203	TFAP2A	protein_coding	chr6	10398538	10398538	10398531	10398565	-	12	1	AGO1,AGO1-4,AGO2,AGO3	3	0	3	3	0	0	0	7
MIMAT0001341	hsa-miR-424-5p	ENSG00000137203	TFAP2A	protein_coding	chr6	10398550	10398553	10398540	10398577	-	12	1	AGO1,AGO1-4,AGO2,AGO3	2	0	2	3	0	0	0	7
MIMAT0001341	hsa-miR-424-5p	ENSG00000137203	TFAP2A	protein_coding	chr6	10398837	10398865	10398837	10398865	-	4	0	AGO1-4,AGO2	0	0	0	1	0	0	0	7
MIMAT0001341	hsa-miR-424-5p	ENSG00000137203	TFAP2A	protein_coding	chr6	10404758	10404786	10404758	10404786	-	1	0	AGO1-4	0	0	0	1	0	0	0	7
MIMAT0001412	hsa-miR-18b-5p	ENSG00000137203	TFAP2A	protein_coding	chr6	10398199	10398204	10398199	10398204	-	8	0	AGO1,AGO1-4,AGO2	1	0	0	0	0	0	0	1
MIMAT0001536	hsa-miR-429	ENSG00000137203	TFAP2A	protein_coding	chr6	10397215	10397221	10397214	10397235	-	2	0	AGO1-4	1	0	1	0	1	1	1	3
MIMAT0001536	hsa-miR-429	ENSG00000137203	TFAP2A	protein_coding	chr6	10397679	10397707	10397679	10397707	-	1	0	AGO1-4	0	0	0	1	0	0	0	3
MIMAT0001536	hsa-miR-429	ENSG00000137203	TFAP2A	protein_coding	chr6	10398114	10398120	10398113	10398141	-	12	0	AGO1-4,AGO2	1	0	1	1	1	1	1	3
MIMAT0001541	hsa-miR-449a	ENSG00000137203	TFAP2A	protein_coding	chr6	10398478	10398483	10398478	10398483	-	3	0	AGO1-4	1	0	0	0	0	0	0	4
MIMAT0001627	hsa-miR-433-3p	ENSG00000137203	TFAP2A	protein_coding	chr6	10397768	10397773	10397768	10397773	-	10	0	AGO1,AGO1-4,AGO2,AGO3	1	0	0	0	0	0	0	6
MIMAT0001639	hsa-miR-409-3p	ENSG00000137203	TFAP2A	protein_coding	chr6	10397427	10397432	10397427	10397432	-	5	0	AGO1,AGO1-4,AGO2	1	0	0	0	0	0	0	7
MIMAT0001639	hsa-miR-409-3p	ENSG00000137203	TFAP2A	protein_coding	chr6	10398126	10398132	10398125	10398153	-	12	0	AGO1-4,AGO2	1	0	1	1	0	0	0	7
MIMAT0001639	hsa-miR-409-3p	ENSG00000137203	TFAP2A	protein_coding	chr6	10400729	10400757	10400729	10400757	-	5	0	AGO1-4,AGO2	0	0	0	1	0	0	0	7
MIMAT0002171	hsa-miR-410-3p	ENSG00000137203	TFAP2A	protein_coding	chr6	10397991	10397997	10397990	10398018	-	14	0	AGO1,AGO1-4,AGO2,AGO3	1	0	0	1	1	0	0	10
MIMAT0002171	hsa-miR-410-3p	ENSG00000137203	TFAP2A	protein_coding	chr6	10398227	10398232	10398226	10398254	-	5	0	AGO1,AGO1-4,AGO2	1	0	0	1	0	0	0	10
MIMAT0002175	hsa-miR-485-5p	ENSG00000137203	TFAP2A	protein_coding	chr6	10398452	10398458	10398452	10398458	-	3	0	AGO1,AGO1-4	1	0	0	0	0	0	0	3
MIMAT0002805	hsa-miR-489-3p	ENSG00000137203	TFAP2A	protein_coding	chr6	10398074	10398079	10398074	10398079	-	7	0	AGO1-4,AGO2	1	0	0	0	0	0	0	1
MIMAT0002807	hsa-miR-491-5p	ENSG00000137203	TFAP2A	protein_coding	chr6	10398421	10398427	10398421	10398427	-	2	0	AGO1-4	1	0	0	0	0	0	0	10
MIMAT0002816	hsa-miR-494-3p	ENSG00000137203	TFAP2A	protein_coding	chr6	10397131	10397136	10397131	10397136	-	1	0	AGO1-4	1	0	0	0	0	0	0	4
MIMAT0002817	hsa-miR-495-3p	ENSG00000137203	TFAP2A	protein_coding	chr6	10397227	10397232	10397227	10397232	-	2	0	AGO1-4	1	0	0	0	0	0	0	8
MIMAT0002817	hsa-miR-495-3p	ENSG00000137203	TFAP2A	protein_coding	chr6	10397309	10397314	10397309	10397314	-	5	0	AGO1-4,AGO2	1	0	0	0	0	0	0	8
MIMAT0002820	hsa-miR-497-5p	ENSG00000137203	TFAP2A	protein_coding	chr6	10398538	10398538	10398531	10398565	-	12	1	AGO1,AGO1-4,AGO2,AGO3	3	0	3	3	0	0	0	9
MIMAT0002820	hsa-miR-497-5p	ENSG00000137203	TFAP2A	protein_coding	chr6	10398550	10398553	10398540	10398577	-	12	1	AGO1,AGO1-4,AGO2,AGO3	2	0	2	3	0	0	0	9
MIMAT0002820	hsa-miR-497-5p	ENSG00000137203	TFAP2A	protein_coding	chr6	10398837	10398865	10398837	10398865	-	4	0	AGO1-4,AGO2	0	0	0	1	0	0	0	9
MIMAT0002820	hsa-miR-497-5p	ENSG00000137203	TFAP2A	protein_coding	chr6	10404758	10404786	10404758	10404786	-	1	0	AGO1-4	0	0	0	1	0	0	0	9
MIMAT0002824	hsa-miR-498	ENSG00000137203	TFAP2A	protein_coding	chr6	10398022	10398027	10398022	10398027	-	11	0	AGO1-4,AGO2	1	0	0	0	0	0	0	6
MIMAT0002824	hsa-miR-498	ENSG00000137203	TFAP2A	protein_coding	chr6	10398099	10398104	10398099	10398104	-	10	0	AGO1-4,AGO2	1	0	0	0	0	0	0	6
MIMAT0002842	hsa-miR-518f-3p	ENSG00000137203	TFAP2A	protein_coding	chr6	10397279	10397284	10397279	10397284	-	2	0	AGO1-4	1	0	0	0	0	0	0	5
MIMAT0002844	hsa-miR-518b	ENSG00000137203	TFAP2A	protein_coding	chr6	10397279	10397284	10397279	10397284	-	2	0	AGO1-4	1	0	0	0	0	0	0	3
MIMAT0002848	hsa-miR-518c-3p	ENSG00000137203	TFAP2A	protein_coding	chr6	10397279	10397284	10397279	10397284	-	2	0	AGO1-4	1	0	0	0	0	0	0	4
MIMAT0002849	hsa-miR-524-5p	ENSG00000137203	TFAP2A	protein_coding	chr6	10396996	10397001	10396996	10397001	-	2	0	AGO2	1	0	0	0	0	0	0	4
MIMAT0002855	hsa-miR-520d-5p	ENSG00000137203	TFAP2A	protein_coding	chr6	10396996	10397001	10396996	10397001	-	2	0	AGO2	1	0	0	0	0	0	0	5
MIMAT0002863	hsa-miR-518a-3p	ENSG00000137203	TFAP2A	protein_coding	chr6	10397279	10397284	10397279	10397284	-	2	0	AGO1-4	1	0	0	0	0	0	0	3
MIMAT0002864	hsa-miR-518d-3p	ENSG00000137203	TFAP2A	protein_coding	chr6	10397279	10397284	10397279	10397284	-	2	0	AGO1-4	1	0	0	0	0	0	0	3
MIMAT0002874	hsa-miR-503-5p	ENSG00000137203	TFAP2A	protein_coding	chr6	10398538	10398539	10398532	10398545	-	12	0	AGO1,AGO1-4,AGO2,AGO3	3	0	0	0	0	0	0	9
MIMAT0002874	hsa-miR-503-5p	ENSG00000137203	TFAP2A	protein_coding	chr6	10398550	10398554	10398547	10398557	-	12	0	AGO1,AGO1-4,AGO2,AGO3	2	0	0	0	0	0	0	9
MIMAT0002882	hsa-miR-510-5p	ENSG00000137203	TFAP2A	protein_coding	chr6	10393429	10393435	10393429	10393435	-	1	0	AGO1-4	0	0	1	0	0	0	0	1
MIMAT0002882	hsa-miR-510-5p	ENSG00000137203	TFAP2A	protein_coding	chr6	10398208	10398213	10398208	10398213	-	7	0	AGO1,AGO1-4,AGO2	1	0	0	0	0	0	0	1
MIMAT0002883	hsa-miR-514a-3p	ENSG00000137203	TFAP2A	protein_coding	chr6	10397328	10397333	10397328	10397333	-	5	0	AGO1-4,AGO2	1	0	0	0	0	0	0	7
MIMAT0002890	hsa-miR-299-5p	ENSG00000137203	TFAP2A	protein_coding	chr6	10397495	10397500	10397495	10397500	-	2	0	AGO1-4	1	0	0	0	0	0	0	4
MIMAT0003161	hsa-miR-493-3p	ENSG00000137203	TFAP2A	protein_coding	chr6	10398198	10398203	10398198	10398203	-	8	0	AGO1,AGO1-4,AGO2	1	0	0	0	0	0	0	5
MIMAT0003218	hsa-miR-92b-3p	ENSG00000137203	TFAP2A	protein_coding	chr6	10397153	10397158	10397152	10397158	-	2	0	AGO1-4,AGO2	1	0	0	0	0	1	1	6
MIMAT0003241	hsa-miR-576-5p	ENSG00000137203	TFAP2A	protein_coding	chr6	10397807	10397812	10397807	10397812	-	4	0	AGO1-4,AGO2	1	0	0	0	0	0	0	4
MIMAT0003242	hsa-miR-577	ENSG00000137203	TFAP2A	protein_coding	chr6	10397691	10397719	10397691	10397719	-	1	0	AGO1-4	0	0	0	1	0	0	0	7
MIMAT0003242	hsa-miR-577	ENSG00000137203	TFAP2A	protein_coding	chr6	10397886	10397892	10397885	10397913	-	4	0	AGO1-4,AGO2	1	0	1	1	0	0	0	7
MIMAT0003244	hsa-miR-579-3p	ENSG00000137203	TFAP2A	protein_coding	chr6	10397511	10397516	10397511	10397516	-	1	0	AGO1-4	1	0	0	0	0	0	0	2
MIMAT0003245	hsa-miR-580-3p	ENSG00000137203	TFAP2A	protein_coding	chr6	10400741	10400769	10400741	10400769	-	4	0	AGO1-4,AGO2	0	0	0	1	0	0	0	5
MIMAT0003255	hsa-miR-588	ENSG00000137203	TFAP2A	protein_coding	chr6	10397392	10397397	10397392	10397397	-	6	0	AGO1-4,AGO2	1	0	0	0	0	0	0	0
MIMAT0003267	hsa-miR-599	ENSG00000137203	TFAP2A	protein_coding	chr6	10398094	10398099	10398093	10398115	-	12	0	AGO1-4,AGO2	1	0	1	0	1	1	0	7
MIMAT0003281	hsa-miR-613	ENSG00000137203	TFAP2A	protein_coding	chr6	10400727	10400755	10400727	10400755	-	5	0	AGO1-4,AGO2	0	0	0	1	0	0	0	0
MIMAT0003293	hsa-miR-624-5p	ENSG00000137203	TFAP2A	protein_coding	chr6	10397816	10397822	10397816	10397822	-	4	0	AGO1-4,AGO2	0	0	1	0	0	0	0	5
MIMAT0003294	hsa-miR-625-5p	ENSG00000137203	TFAP2A	protein_coding	chr6	10398496	10398501	10398496	10398501	-	4	0	AGO1-4	1	0	0	0	0	0	0	8
MIMAT0003311	hsa-miR-641	ENSG00000137203	TFAP2A	protein_coding	chr6	10397247	10397252	10397247	10397252	-	2	0	AGO1-4	1	0	1	0	0	0	0	2
MIMAT0003311	hsa-miR-641	ENSG00000137203	TFAP2A	protein_coding	chr6	10397501	10397506	10397501	10397506	-	2	0	AGO1-4	1	0	1	0	0	0	0	2
MIMAT0003311	hsa-miR-641	ENSG00000137203	TFAP2A	protein_coding	chr6	10398068	10398074	10398068	10398074	-	7	0	AGO1-4,AGO2	1	0	1	0	0	0	0	2
MIMAT0003326	hsa-miR-663a	ENSG00000137203	TFAP2A	protein_coding	chr6	10398434	10398439	10398434	10398439	-	2	0	AGO1-4	1	0	0	0	0	0	0	0
MIMAT0003326	hsa-miR-663a	ENSG00000137203	TFAP2A	protein_coding	chr6	10398624	10398640	10398618	10398645	-	5	0	AGO1-4,AGO2	0	2	0	0	0	0	0	0
MIMAT0003327	hsa-miR-449b-5p	ENSG00000137203	TFAP2A	protein_coding	chr6	10398478	10398483	10398478	10398483	-	3	0	AGO1-4	1	0	0	0	0	0	0	3
MIMAT0003330	hsa-miR-654-5p	ENSG00000137203	TFAP2A	protein_coding	chr6	10398420	10398425	10398420	10398425	-	2	0	AGO1-4	1	0	1	0	0	0	0	5
MIMAT0003330	hsa-miR-654-5p	ENSG00000137203	TFAP2A	protein_coding	chr6	10398595	10398601	10398594	10398618	-	4	0	AGO1-4,AGO2	1	1	1	0	0	0	0	5
MIMAT0003393	hsa-miR-425-5p	ENSG00000137203	TFAP2A	protein_coding	chr6	10398073	10398078	10398073	10398078	-	7	0	AGO1-4,AGO2	1	0	0	0	0	0	0	8
MIMAT0003881	hsa-miR-668-3p	ENSG00000137203	TFAP2A	protein_coding	chr6	10398673	10398701	10398673	10398701	-	4	0	AGO1-4	0	0	0	1	0	0	0	7
MIMAT0003881	hsa-miR-668-3p	ENSG00000137203	TFAP2A	protein_coding	chr6	10400707	10400735	10400707	10400735	-	6	0	AGO1-4,AGO2	0	0	0	1	0	0	0	7
MIMAT0004502	hsa-miR-28-3p	ENSG00000137203	TFAP2A	protein_coding	chr6	10397373	10397378	10397373	10397378	-	7	0	AGO1-4,AGO2	1	0	0	0	0	0	0	7
MIMAT0004597	hsa-miR-140-3p	ENSG00000137203	TFAP2A	protein_coding	chr6	10397826	10397831	10397826	10397831	-	4	0	AGO1-4,AGO2	1	0	0	0	0	0	0	13
MIMAT0004679	hsa-miR-296-3p	ENSG00000137203	TFAP2A	protein_coding	chr6	10397592	10397597	10397592	10397597	-	1	0	AGO2	1	0	1	0	0	0	0	2
MIMAT0004679	hsa-miR-296-3p	ENSG00000137203	TFAP2A	protein_coding	chr6	10398326	10398331	10398325	10398346	-	3	0	AGO1-4,AGO2	1	0	1	0	1	0	0	2
MIMAT0004679	hsa-miR-296-3p	ENSG00000137203	TFAP2A	protein_coding	chr6	10398560	10398566	10398560	10398566	-	11	0	AGO1,AGO1-4,AGO2,AGO3	1	0	1	0	0	0	0	2
MIMAT0004682	hsa-miR-361-3p	ENSG00000137203	TFAP2A	protein_coding	chr6	10397791	10397796	10397790	10397818	-	10	0	AGO1,AGO1-4,AGO2,AGO3	1	0	0	1	0	0	0	9
MIMAT0004687	hsa-miR-371a-5p	ENSG00000137203	TFAP2A	protein_coding	chr6	10397521	10397526	10397521	10397526	-	1	0	AGO1-4	1	0	0	0	0	0	0	4
MIMAT0004748	hsa-miR-423-5p	ENSG00000137203	TFAP2A	protein_coding	chr6	10398626	10398632	10398625	10398645	-	5	0	AGO1-4,AGO2	1	1	1	0	0	0	0	6
MIMAT0004763	hsa-miR-488-3p	ENSG00000137203	TFAP2A	protein_coding	chr6	10397102	10397122	10397102	10397122	-	1	0	AGO1-4	0	0	0	0	1	0	0	9
MIMAT0004784	hsa-miR-455-3p	ENSG00000137203	TFAP2A	protein_coding	chr6	10398211	10398216	10398210	10398216	-	6	0	AGO1,AGO1-4,AGO2	1	0	0	0	0	0	1	5
MIMAT0004784	hsa-miR-455-3p	ENSG00000137203	TFAP2A	protein_coding	chr6	10398480	10398485	10398480	10398485	-	3	0	AGO1-4	1	0	0	0	0	0	0	5
MIMAT0004805	hsa-miR-616-3p	ENSG00000137203	TFAP2A	protein_coding	chr6	10396980	10396985	10396980	10396985	-	2	0	AGO2	1	0	1	0	0	0	0	5
MIMAT0004809	hsa-miR-628-5p	ENSG00000137203	TFAP2A	protein_coding	chr6	10398565	10398570	10398565	10398570	-	11	0	AGO1,AGO1-4,AGO2,AGO3	1	0	0	0	0	0	0	11
MIMAT0004903	hsa-miR-300	ENSG00000137203	TFAP2A	protein_coding	chr6	10397363	10397368	10397363	10397368	-	7	0	AGO1-4,AGO2	1	0	0	0	0	0	0	0
MIMAT0004916	hsa-miR-888-5p	ENSG00000137203	TFAP2A	protein_coding	chr6	10397185	10397190	10397185	10397190	-	2	0	AGO1-4,AGO2	1	0	0	0	0	0	0	3
MIMAT0004916	hsa-miR-888-5p	ENSG00000137203	TFAP2A	protein_coding	chr6	10397358	10397363	10397358	10397363	-	7	0	AGO1-4,AGO2	1	0	0	0	0	0	0	3
MIMAT0004920	hsa-miR-541-3p	ENSG00000137203	TFAP2A	protein_coding	chr6	10398420	10398425	10398420	10398425	-	2	0	AGO1-4	1	0	0	0	0	0	0	2
MIMAT0004920	hsa-miR-541-3p	ENSG00000137203	TFAP2A	protein_coding	chr6	10398595	10398601	10398594	10398618	-	4	0	AGO1-4,AGO2	1	1	0	0	0	0	0	2
MIMAT0004924	hsa-miR-876-5p	ENSG00000137203	TFAP2A	protein_coding	chr6	10397803	10397809	10397802	10397830	-	4	0	AGO1-4,AGO2	1	0	0	1	1	0	1	3
MIMAT0004926	hsa-miR-708-5p	ENSG00000137203	TFAP2A	protein_coding	chr6	10397159	10397164	10397159	10397164	-	2	0	AGO1-4,AGO2	1	0	0	0	0	0	0	7
MIMAT0004945	hsa-miR-744-5p	ENSG00000137203	TFAP2A	protein_coding	chr6	10398604	10398609	10398604	10398609	-	4	0	AGO1-4,AGO2	1	0	0	0	0	0	0	9
MIMAT0004945	hsa-miR-744-5p	ENSG00000137203	TFAP2A	protein_coding	chr6	10398630	10398649	10398630	10398649	-	4	0	AGO1-4	0	1	0	0	0	0	0	9
MIMAT0004947	hsa-miR-885-5p	ENSG00000137203	TFAP2A	protein_coding	chr6	10397937	10397942	10397937	10397942	-	7	0	AGO1-4,AGO2	1	0	0	0	0	0	0	12
MIMAT0004953	hsa-miR-873-5p	ENSG00000137203	TFAP2A	protein_coding	chr6	10398555	10398560	10398555	10398560	-	11	1	AGO1,AGO1-4,AGO2,AGO3	1	0	0	0	0	0	0	4
MIMAT0004955	hsa-miR-374b-5p	ENSG00000137203	TFAP2A	protein_coding	chr6	10398228	10398233	10398228	10398233	-	5	0	AGO1,AGO1-4,AGO2	1	0	0	0	0	0	0	11
MIMAT0004987	hsa-miR-944	ENSG00000137203	TFAP2A	protein_coding	chr6	10397685	10397713	10397685	10397713	-	1	0	AGO1-4	0	0	0	1	0	0	0	1
MIMAT0005788	hsa-miR-513b-5p	ENSG00000137203	TFAP2A	protein_coding	chr6	10393479	10393485	10393479	10393485	-	1	0	AGO1-4	0	0	1	0	0	0	0	3
MIMAT0005788	hsa-miR-513b-5p	ENSG00000137203	TFAP2A	protein_coding	chr6	10398110	10398115	10398109	10398137	-	12	0	AGO1-4,AGO2	1	0	0	1	0	1	0	3
MIMAT0005788	hsa-miR-513b-5p	ENSG00000137203	TFAP2A	protein_coding	chr6	10398331	10398336	10398330	10398358	-	3	0	AGO1-4,AGO2	1	0	0	1	0	1	0	3
MIMAT0005795	hsa-miR-1323	ENSG00000137203	TFAP2A	protein_coding	chr6	10397854	10397859	10397854	10397859	-	4	0	AGO1-4,AGO2	1	0	0	0	0	0	0	3
MIMAT0005796	hsa-miR-1271-5p	ENSG00000137203	TFAP2A	protein_coding	chr6	10398339	10398344	10398338	10398366	-	3	0	AGO1-4,AGO2	1	0	0	1	0	0	0	10
MIMAT0005796	hsa-miR-1271-5p	ENSG00000137203	TFAP2A	protein_coding	chr6	10400761	10400789	10400761	10400789	-	2	0	AGO1-4	0	0	0	1	0	0	0	10
MIMAT0005800	hsa-miR-1298-5p	ENSG00000137203	TFAP2A	protein_coding	chr6	10396981	10396986	10396981	10396986	-	2	0	AGO2	1	0	0	0	0	0	0	5
MIMAT0005877	hsa-miR-1286	ENSG00000137203	TFAP2A	protein_coding	chr6	10398554	10398559	10398554	10398559	-	12	1	AGO1,AGO1-4,AGO2,AGO3	1	0	0	0	0	0	0	3
MIMAT0005884	hsa-miR-1294	ENSG00000137203	TFAP2A	protein_coding	chr6	10398615	10398620	10398615	10398620	-	4	0	AGO1-4,AGO2	1	0	0	0	0	0	0	2
MIMAT0005886	hsa-miR-1297	ENSG00000137203	TFAP2A	protein_coding	chr6	10398023	10398028	10398022	10398050	-	11	0	AGO1-4,AGO2	1	0	0	1	0	1	1	0
MIMAT0005886	hsa-miR-1297	ENSG00000137203	TFAP2A	protein_coding	chr6	10398100	10398105	10398099	10398127	-	12	0	AGO1-4,AGO2	1	0	0	1	1	1	1	0
MIMAT0005919	hsa-miR-548o-3p	ENSG00000137203	TFAP2A	protein_coding	chr6	10397854	10397859	10397854	10397859	-	4	0	AGO1-4,AGO2	1	0	0	0	0	0	0	6
MIMAT0005930	hsa-miR-1276	ENSG00000137203	TFAP2A	protein_coding	chr6	10397450	10397455	10397450	10397455	-	3	2	AGO1-4,AGO2	1	0	0	0	0	0	0	2
MIMAT0005930	hsa-miR-1276	ENSG00000137203	TFAP2A	protein_coding	chr6	10398044	10398049	10398044	10398049	-	8	0	AGO1-4,AGO2	1	0	0	0	0	0	0	2
MIMAT0005952	hsa-miR-1321	ENSG00000137203	TFAP2A	protein_coding	chr6	10397173	10397178	10397173	10397178	-	2	0	AGO1-4,AGO2	1	0	1	0	0	0	0	0
MIMAT0005952	hsa-miR-1321	ENSG00000137203	TFAP2A	protein_coding	chr6	10397538	10397544	10397538	10397544	-	1	0	AGO1	1	0	1	0	0	0	0	0
MIMAT0005955	hsa-miR-1197	ENSG00000137203	TFAP2A	protein_coding	chr6	10397542	10397547	10397542	10397547	-	1	0	AGO1	1	0	0	0	0	0	0	4
MIMAT0007888	hsa-miR-1913	ENSG00000137203	TFAP2A	protein_coding	chr6	10398456	10398462	10398456	10398462	-	4	0	AGO1,AGO1-4	0	0	1	0	0	0	0	4
MIMAT0010364	hsa-miR-761	ENSG00000137203	TFAP2A	protein_coding	chr6	10398536	10398536	10398530	10398564	-	12	1	AGO1,AGO1-4,AGO2,AGO3	0	0	2	3	0	0	0	0
MIMAT0010364	hsa-miR-761	ENSG00000137203	TFAP2A	protein_coding	chr6	10398540	10398542	10398537	10398567	-	12	1	AGO1,AGO1-4,AGO2,AGO3	0	0	2	1	0	0	0	0
MIMAT0010364	hsa-miR-761	ENSG00000137203	TFAP2A	protein_coding	chr6	10398552	10398554	10398548	10398579	-	12	1	AGO1,AGO1-4,AGO2,AGO3	0	0	2	2	0	0	0	0
MIMAT0010364	hsa-miR-761	ENSG00000137203	TFAP2A	protein_coding	chr6	10398907	10398935	10398907	10398935	-	3	0	AGO1-4	0	0	0	1	0	0	0	0
MIMAT0010364	hsa-miR-761	ENSG00000137203	TFAP2A	protein_coding	chr6	10404757	10404785	10404757	10404785	-	1	0	AGO1-4	0	0	0	1	0	0	0	0
MIMAT0014989	hsa-miR-3126-5p	ENSG00000137203	TFAP2A	protein_coding	chr6	10397126	10397132	10397126	10397132	-	1	0	AGO1-4	0	0	0	0	0	1	0	0
MIMAT0015008	hsa-miR-3140-3p	ENSG00000137203	TFAP2A	protein_coding	chr6	10398145	10398173	10398145	10398173	-	8	0	AGO1-4,AGO2	0	0	0	1	0	0	0	1
MIMAT0015008	hsa-miR-3140-3p	ENSG00000137203	TFAP2A	protein_coding	chr6	10398679	10398707	10398679	10398707	-	4	0	AGO1-4	0	0	0	1	0	0	0	1
MIMAT0015037	hsa-miR-3163	ENSG00000137203	TFAP2A	protein_coding	chr6	10397261	10397266	10397261	10397266	-	2	0	AGO1-4	0	0	1	0	0	0	0	1
MIMAT0015037	hsa-miR-3163	ENSG00000137203	TFAP2A	protein_coding	chr6	10397553	10397559	10397553	10397559	-	1	0	AGO1	0	0	1	0	0	0	0	1
MIMAT0015037	hsa-miR-3163	ENSG00000137203	TFAP2A	protein_coding	chr6	10397892	10397897	10397892	10397897	-	4	0	AGO1-4,AGO2	0	0	1	0	0	0	0	1
MIMAT0015037	hsa-miR-3163	ENSG00000137203	TFAP2A	protein_coding	chr6	10398121	10398126	10398121	10398126	-	12	0	AGO1-4,AGO2	0	0	1	0	0	0	0	1
MIMAT0015042	hsa-miR-3167	ENSG00000137203	TFAP2A	protein_coding	chr6	10397802	10397809	10397802	10397830	-	4	0	AGO1-4,AGO2	0	0	0	1	0	0	1	2
MIMAT0015056	hsa-miR-3179	ENSG00000137203	TFAP2A	protein_coding	chr6	10397590	10397595	10397590	10397595	-	1	0	AGO2	0	0	1	0	0	0	0	0
MIMAT0015056	hsa-miR-3179	ENSG00000137203	TFAP2A	protein_coding	chr6	10398558	10398563	10398558	10398563	-	11	1	AGO1,AGO1-4,AGO2,AGO3	0	0	1	0	0	0	0	0
MIMAT0015058	hsa-miR-3180-3p	ENSG00000137203	TFAP2A	protein_coding	chr6	10398628	10398634	10398627	10398649	-	5	0	AGO1-4,AGO2	0	1	1	0	0	0	0	0
MIMAT0015064	hsa-miR-3184-5p	ENSG00000137203	TFAP2A	protein_coding	chr6	10398626	10398632	10398626	10398632	-	4	0	AGO1-4,AGO2	0	0	1	0	0	0	0	1
MIMAT0015080	hsa-miR-3196	ENSG00000137203	TFAP2A	protein_coding	chr6	10398632	10398634	10398616	10398649	-	5	0	AGO1-4,AGO2	0	2	1	0	0	0	0	0
MIMAT0016858	hsa-miR-4306	ENSG00000137203	TFAP2A	protein_coding	chr6	10397175	10397180	10397175	10397180	-	2	0	AGO1-4,AGO2	0	0	1	0	0	0	0	0
MIMAT0016858	hsa-miR-4306	ENSG00000137203	TFAP2A	protein_coding	chr6	10397459	10397465	10397458	10397474	-	2	3	AGO1-4	0	1	1	0	0	0	0	0
MIMAT0016858	hsa-miR-4306	ENSG00000137203	TFAP2A	protein_coding	chr6	10398449	10398454	10398449	10398454	-	3	0	AGO1,AGO1-4	0	0	1	0	0	0	0	0
MIMAT0016895	hsa-miR-2355-5p	ENSG00000137203	TFAP2A	protein_coding	chr6	10398882	10398910	10398882	10398910	-	3	1	AGO1-4	0	0	0	1	0	0	0	6
MIMAT0017352	hsa-miR-2277-5p	ENSG00000137203	TFAP2A	protein_coding	chr6	10398602	10398608	10398602	10398608	-	4	0	AGO1-4,AGO2	0	0	1	0	0	0	0	2
MIMAT0017950	hsa-miR-2355-3p	ENSG00000137203	TFAP2A	protein_coding	chr6	10397721	10397749	10397721	10397749	-	8	0	AGO1,AGO1-4,AGO2,AGO3	0	0	0	1	0	0	0	4
MIMAT0017950	hsa-miR-2355-3p	ENSG00000137203	TFAP2A	protein_coding	chr6	10398692	10398720	10398692	10398720	-	8	0	AGO1-4,AGO2	0	0	0	1	0	0	0	4
MIMAT0017950	hsa-miR-2355-3p	ENSG00000137203	TFAP2A	protein_coding	chr6	10398731	10398759	10398731	10398759	-	8	0	AGO1-4,AGO2	0	0	0	1	0	0	0	4
MIMAT0017950	hsa-miR-2355-3p	ENSG00000137203	TFAP2A	protein_coding	chr6	10404908	10404936	10404908	10404936	-	6	0	AGO1,AGO1-4,AGO2	0	0	0	1	0	0	0	4
MIMAT0017997	hsa-miR-3617-5p	ENSG00000137203	TFAP2A	protein_coding	chr6	10397247	10397252	10397247	10397252	-	2	0	AGO1-4	0	0	1	0	0	0	0	4
MIMAT0017997	hsa-miR-3617-5p	ENSG00000137203	TFAP2A	protein_coding	chr6	10397501	10397506	10397501	10397506	-	2	0	AGO1-4	0	0	1	0	0	0	0	4
MIMAT0017997	hsa-miR-3617-5p	ENSG00000137203	TFAP2A	protein_coding	chr6	10398068	10398074	10398068	10398074	-	7	0	AGO1-4,AGO2	0	0	1	0	0	0	0	4
MIMAT0017999	hsa-miR-3619-5p	ENSG00000137203	TFAP2A	protein_coding	chr6	10398536	10398536	10398530	10398564	-	12	1	AGO1,AGO1-4,AGO2,AGO3	0	0	2	3	0	0	0	1
MIMAT0017999	hsa-miR-3619-5p	ENSG00000137203	TFAP2A	protein_coding	chr6	10398540	10398542	10398537	10398567	-	12	1	AGO1,AGO1-4,AGO2,AGO3	0	0	2	1	0	0	0	1
MIMAT0017999	hsa-miR-3619-5p	ENSG00000137203	TFAP2A	protein_coding	chr6	10398552	10398554	10398548	10398579	-	12	1	AGO1,AGO1-4,AGO2,AGO3	0	0	2	2	0	0	0	1
MIMAT0017999	hsa-miR-3619-5p	ENSG00000137203	TFAP2A	protein_coding	chr6	10398907	10398935	10398907	10398935	-	3	0	AGO1-4	0	0	0	1	0	0	0	1
MIMAT0017999	hsa-miR-3619-5p	ENSG00000137203	TFAP2A	protein_coding	chr6	10404757	10404785	10404757	10404785	-	1	0	AGO1-4	0	0	0	1	0	0	0	1
MIMAT0018005	hsa-miR-3622b-5p	ENSG00000137203	TFAP2A	protein_coding	chr6	10397334	10397340	10397334	10397340	-	5	0	AGO1-4,AGO2	0	0	1	0	0	0	0	0
MIMAT0018108	hsa-miR-3681-5p	ENSG00000137203	TFAP2A	protein_coding	chr6	10397547	10397552	10397547	10397552	-	1	0	AGO1	0	0	1	0	0	0	0	4
MIMAT0018178	hsa-miR-3180	ENSG00000137203	TFAP2A	protein_coding	chr6	10398628	10398634	10398627	10398645	-	5	0	AGO1-4,AGO2	0	1	1	0	0	0	0	1
MIMAT0018192	hsa-miR-3918	ENSG00000137203	TFAP2A	protein_coding	chr6	10397756	10397784	10397756	10397784	-	11	0	AGO1,AGO1-4,AGO2,AGO3	0	0	0	1	0	0	0	2
MIMAT0018192	hsa-miR-3918	ENSG00000137203	TFAP2A	protein_coding	chr6	10398769	10398797	10398769	10398797	-	5	0	AGO1-4,AGO2	0	0	0	1	0	0	0	2
MIMAT0018194	hsa-miR-3150b-3p	ENSG00000137203	TFAP2A	protein_coding	chr6	10397457	10397463	10397456	10397477	-	2	3	AGO1-4	0	1	1	0	0	0	0	1
MIMAT0018980	hsa-miR-4458	ENSG00000137203	TFAP2A	protein_coding	chr6	10397870	10397898	10397870	10397898	-	4	0	AGO1-4,AGO2	0	0	0	1	0	0	0	1
MIMAT0018980	hsa-miR-4458	ENSG00000137203	TFAP2A	protein_coding	chr6	10398721	10398749	10398721	10398749	-	8	0	AGO1-4,AGO2	0	0	0	1	0	0	0	1
MIMAT0018992	hsa-miR-4465	ENSG00000137203	TFAP2A	protein_coding	chr6	10398023	10398028	10398022	10398050	-	11	0	AGO1-4,AGO2	0	0	1	1	0	0	1	2
MIMAT0018992	hsa-miR-4465	ENSG00000137203	TFAP2A	protein_coding	chr6	10398100	10398105	10398099	10398127	-	12	0	AGO1-4,AGO2	0	0	1	1	0	1	1	2
MIMAT0019036	hsa-miR-4500	ENSG00000137203	TFAP2A	protein_coding	chr6	10397870	10397898	10397870	10397898	-	4	0	AGO1-4,AGO2	0	0	0	1	0	0	0	0
MIMAT0019036	hsa-miR-4500	ENSG00000137203	TFAP2A	protein_coding	chr6	10398721	10398749	10398721	10398749	-	8	0	AGO1-4,AGO2	0	0	0	1	0	0	0	0
MIMAT0019036	hsa-miR-4500	ENSG00000137203	TFAP2A	protein_coding	chr6	10410153	10410181	10410153	10410181	-	8	0	AGO1,AGO1-4,AGO2	0	0	0	1	0	0	0	0
MIMAT0019062	hsa-miR-4524a-5p	ENSG00000137203	TFAP2A	protein_coding	chr6	10396990	10396995	10396990	10396995	-	2	0	AGO2	0	0	1	0	0	0	0	3
MIMAT0019062	hsa-miR-4524a-5p	ENSG00000137203	TFAP2A	protein_coding	chr6	10398546	10398552	10398546	10398552	-	12	0	AGO1,AGO1-4,AGO2,AGO3	0	0	1	0	0	0	0	3
MIMAT0019704	hsa-miR-4644	ENSG00000137203	TFAP2A	protein_coding	chr6	10397175	10397180	10397175	10397180	-	2	0	AGO1-4,AGO2	0	0	1	0	0	0	0	0
MIMAT0019704	hsa-miR-4644	ENSG00000137203	TFAP2A	protein_coding	chr6	10397459	10397465	10397458	10397480	-	2	3	AGO1-4	0	1	1	0	0	0	0	0
MIMAT0019704	hsa-miR-4644	ENSG00000137203	TFAP2A	protein_coding	chr6	10398449	10398454	10398449	10398454	-	3	0	AGO1,AGO1-4	0	0	1	0	0	0	0	0
MIMAT0019864	hsa-miR-3064-5p	ENSG00000137203	TFAP2A	protein_coding	chr6	10398357	10398376	10398357	10398376	-	2	0	AGO1-4	0	1	0	0	0	0	0	1
MIMAT0019868	hsa-miR-4739	ENSG00000137203	TFAP2A	protein_coding	chr6	10397173	10397178	10397173	10397178	-	2	0	AGO1-4,AGO2	0	0	1	0	0	0	0	6
MIMAT0019868	hsa-miR-4739	ENSG00000137203	TFAP2A	protein_coding	chr6	10397538	10397544	10397538	10397544	-	1	0	AGO1	0	0	1	0	0	0	0	6
MIMAT0019899	hsa-miR-4756-5p	ENSG00000137203	TFAP2A	protein_coding	chr6	10397173	10397178	10397173	10397178	-	2	0	AGO1-4,AGO2	0	0	1	0	0	0	0	1
MIMAT0019899	hsa-miR-4756-5p	ENSG00000137203	TFAP2A	protein_coding	chr6	10397538	10397544	10397538	10397544	-	1	0	AGO1	0	0	1	0	0	0	0	1
MIMAT0019924	hsa-miR-4770	ENSG00000137203	TFAP2A	protein_coding	chr6	10398815	10398843	10398815	10398843	-	9	0	AGO1,AGO1-4,AGO2,AGO3	0	0	0	1	0	0	0	2
MIMAT0019948	hsa-miR-4784	ENSG00000137203	TFAP2A	protein_coding	chr6	10397457	10397463	10397456	10397475	-	2	3	AGO1-4	0	1	1	0	0	0	0	1
MIMAT0019953	hsa-miR-2467-3p	ENSG00000137203	TFAP2A	protein_coding	chr6	10393518	10393524	10393518	10393524	-	1	0	AGO1-4	0	0	1	0	0	0	0	0
MIMAT0021125	hsa-miR-5194	ENSG00000137203	TFAP2A	protein_coding	chr6	10398625	10398643	10398625	10398643	-	5	0	AGO1-4,AGO2	0	1	0	0	0	0	0	1
MIMAT0022255	hsa-miR-4524b-5p	ENSG00000137203	TFAP2A	protein_coding	chr6	10396990	10396995	10396990	10396995	-	2	0	AGO2	0	0	1	0	0	0	0	0
MIMAT0022255	hsa-miR-4524b-5p	ENSG00000137203	TFAP2A	protein_coding	chr6	10398546	10398552	10398546	10398552	-	12	0	AGO1,AGO1-4,AGO2,AGO3	0	0	1	0	0	0	0	0
MIMAT0022724	hsa-miR-1277-5p	ENSG00000137203	TFAP2A	protein_coding	chr6	10397957	10397985	10397957	10397985	-	9	0	AGO1,AGO1-4,AGO2,AGO3	0	0	0	1	0	0	0	0
